# Supplementary material for: Cyclo[4]pyrrole with α–β direct linkages
Source: Royal Society of Chemistry journal article supplement (doi:10.1039/d4sc06670g), 2024-01-01
Supplement: d4sc06670g1.pdf [file d4sc06670g1.pdf]

*Electronic Supplementary Information*

## **Cyclo[4]pyrrole with $\alpha$ - $\beta$ direct linkages**

Yuhua Sun,<sup>a</sup> Riku Kitahara,<sup>b</sup> Tomoya Ichino,<sup>c</sup> Yuki Ide,<sup>c</sup> Hisanori Senboku,<sup>a</sup> Soji Shimizu,<sup>b</sup>  
Takayuki Tanaka\*<sup>d</sup> and Yasuhide Inokuma\*<sup>a,c</sup>

<sup>a</sup> Division of Applied Chemistry, Faculty of Engineering, Hokkaido University, Kita 13, Nishi 8, Kita-ku, Sapporo, Hokkaido 060-8628, Japan.

<sup>b</sup> Department of Applied Chemistry, Graduate School of Engineering and Centre for Molecular Systems (CMS), Kyushu University, Fukuoka 819-0395, Japan.

<sup>c</sup> Institute for Chemical Reaction Design and Discovery (WPI-ICReDD), Hokkaido University, Kita 21, Nishi 10, Kita-ku, Sapporo, Hokkaido 001-0021, Japan.

<sup>d</sup> Department of Molecular Engineering, Graduate School of Engineering, Kyoto University, Nishikyo-ku, Kyoto 615-8510, Japan.

Correspondence to: [tanaka@moleng.kyoto-u.ac.jp](mailto:tanaka@moleng.kyoto-u.ac.jp); [inokuma@eng.hokudai.ac.jp](mailto:inokuma@eng.hokudai.ac.jp)

### **Table of Contents**

|                                                           |             |
|-----------------------------------------------------------|-------------|
| <b>1. General Information</b>                             | <b>S-2</b>  |
| <b>2. Synthetic Procedures</b>                            | <b>S-3</b>  |
| <b>3. Single Crystal X-ray Diffraction Analysis</b>       | <b>S-12</b> |
| <b>4. StrainViz Analysis</b>                              | <b>S-14</b> |
| <b>5. UV-Vis Absorption Spectra</b>                       | <b>S-19</b> |
| <b>6. Fluorescence Lifetime Measurement</b>               | <b>S-21</b> |
| <b>7. Electrochemical Measurement</b>                     | <b>S-22</b> |
| <b>8. DFT Calculations</b>                                | <b>S-24</b> |
| <b>9. Chemical Oxidation</b>                              | <b>S-32</b> |
| <b>10. NMR Spectra</b>                                    | <b>S-35</b> |
| <b>11. Cartesian Coordinates for Optimized Structures</b> | <b>S-56</b> |
| <b>12. References</b>                                     | <b>S-71</b> |

## 1. General Information

Solvents and reagents were purchased from Fujifilm WAKO Pure Chemical Industries Ltd., TCI Co., Ltd., Kanto Chemical Co., Inc., or Sigma-Aldrich Co., and used without further purification unless otherwise mentioned. Tetraacetylene was synthesized according to the reported procedure<sup>S1</sup>. All <sup>1</sup>H and <sup>13</sup>C NMR spectra were recorded using JEOL JNM-ECS400 spectrometers, and chemical shifts were reported in parts per million (ppm) relative to an internal standard tetramethylsilane ( $\delta = 0.00$  ppm for <sup>1</sup>H NMR in CDCl<sub>3</sub>) or a solvent residual peak ( $\delta = 77.16$  ppm for <sup>13</sup>C NMR in CDCl<sub>3</sub>,  $\delta = 2.50$  ppm for <sup>1</sup>H NMR in DMSO-*d*<sub>6</sub>, 39.52 ppm for <sup>13</sup>C NMR in DMSO-*d*<sub>6</sub>, and  $\delta = 2.05$  ppm for <sup>1</sup>H NMR in Acetone-*d*<sub>6</sub>). Infrared spectra were measured using a JASCO Co. FT/IR-4600. ESI-TOF-MS spectra were recorded on a Thermo Scientific Executive spectrometer. Elemental analyses were carried out using an Exceter Analytical, Inc. CE440. Melting points were recorded using Yanaco MP-S3. Thin layer chromatography (TLC) was performed on silica gel sheets, MERCK silica gel 60 F<sub>254</sub>. Preparative scale separations were performed by means of gravity column chromatography over silica gel (Cica-Reagent, 60N, 63-210  $\mu$ m). UV-vis absorption spectra were recorded on a Shimadzu UV-1800 spectrophotometer. Fluorescence emission spectra were recorded on a JASCO FP-8550 spectrophotometer. Fluorescence lifetime was recorded on EDINBURGH INSTRUMENTS FLS1000 photoluminescence spectrometer. Quantum yields were measured using a HAMAMATSU Quantaurus-QY Absolute PL quantum yield spectrometer: C11347-01. Analytical HPLC chromatograms were recorded using a JASCO MD-2018 photodiode array detector equipped with a JASCO PU-2089 pump, JASCO AS-2059 sampler, JASCO CO-2060 column thermostat. Recycling HPLC LaboACE LC-5060 equipped with two JAIGEL-2HR columns. Cyclic voltammograms were recorded by ALS Model660E electrochemical analyzer with an electrochemical system utilizing the three-electrode configuration consisting of platinum (working electrode), platinum wire (counter electrode) and Ag/AgNO<sub>3</sub> (reference electrode) in dichloromethane containing 0.1 M tetra-*n*-butylammonium hexafluorophosphate (TBAPF<sub>6</sub>) as a supporting electrolyte. Spectroelectrochemical measurements were conducted on a JASCO V-770 spectrophotometer using a CH Instrument Model 700E (ALS) in dichloromethane solutions with 0.3 M tetra-*n*-butylammonium hexafluorophosphate as a supporting electrolyte. Measurements were made with an optically transparent thin-layer electrode cell containing a degassed sample solution using a Pt mini-grid as a working electrode, a Pt wire as a counter electrode, and an Ag/AgCl wire as a reference electrode. Single crystal X-ray diffraction data were obtained using Rigaku XtaLAB P200 diffractometer equipped with a PILATUS200K detector, which uses a multilayer mirror (MoK $\alpha$  radiation  $\lambda = 0.71073$  Å). All structures were solved using a dual-space algorithm (SHELXT<sup>S2</sup>) and refined using full-matrix least-squares method (SHELXL<sup>S3</sup>).

## 2. Synthetic Procedures

### 2-1 Synthesis of 3,4-diacetyl-1-butyl-2,5-dimethylpyrrole (**6**)

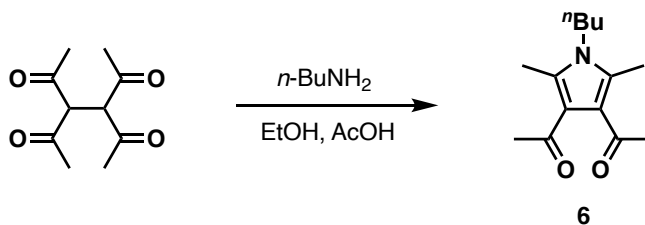

Tetraacetylene<sup>S1</sup> (7.93 g, 40.0 mmol) was dissolved in a 1:1 (v/v) mixture (200 mL) of EtOH and AcOH in a 500 mL round bottom flask equipped with a reflux condenser. To the solution, *n*-butylamine (4.00 mL, 40.0 mol) was added, and the mixture was refluxed overnight. After cooling the reaction mixture to room temperature, the solvent was removed with a rotary evaporator. 200 mL of saturated aqueous NaHCO<sub>3</sub> solution was added to the residue, and the products were extracted by washing with dichloromethane (50 mL × 3). The combined organic layer was dried over Na<sub>2</sub>SO<sub>4</sub> followed by rotary evaporation to dryness. The residue was chromatographed on a silica gel column (diameter: 6 cm, height: 15 cm, eluent: ethyl acetate/hexane = 1:1) to give compound **6** (7.56 g, 32.1 mmol) in 80% yield as a colorless solid.

$R_f$  = 0.30 (silica gel, ethyl acetate/hexane = 1:1), m.p.: 45-48 °C; <sup>1</sup>H NMR (400 MHz, DMSO-*d*<sub>6</sub>, 298 K):  $\delta$  = 3.83 (t,  $J$  = 7.6 Hz, 2H, methylene), 2.29 (s, 6H, methyl), 2.26 (s, 6H, methyl), 1.52 (m, 2H, methylene), 1.33 (sext,  $J$  = 7.6 Hz, 2H, methylene), 0.92 ppm (t,  $J$  = 7.2 Hz, 3H, methyl); <sup>13</sup>C{<sup>1</sup>H} NMR (100 MHz, DMSO-*d*<sub>6</sub>, 298 K):  $\delta$  = 196.4, 131.5, 122.5, 42.8, 31.9, 30.8, 19.4, 13.5, 10.9 ppm; IR(ATR, neat) 2956, 2933, 2864, 1664, 1639, 1415, 1384, 1365, 1342, 1155, 593 cm<sup>-1</sup>; HRMS(ESI):  $m/z$  calcd for C<sub>14</sub>H<sub>21</sub>NO<sub>2</sub>Na<sup>+</sup>: 258.1465 [ $M$ +Na]<sup>+</sup>; found: 258.1459; elemental analysis calcd (%) for C<sub>14</sub>H<sub>21</sub>NO<sub>2</sub>: C, 71.44; H, 9.00; N, 5.95; found: C, 71.38; H, 9.04; N, 5.93.

## 2-2 Synthesis of 3-acetyl-1-butyl-2,5-dimethylpyrrole (7)

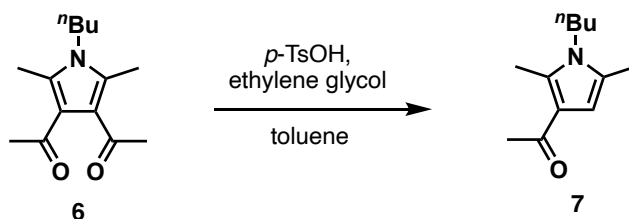

In a 300 mL round bottom flask equipped with a refluxing condenser, compound **6** (4.71 g, 20.0 mmol), ethylene glycol (1.12 mL, 20.0 mmol), *p*-toluenesulfonic acid monohydrate (0.38 g, 2.0 mmol) were dissolved in 100 mL of toluene. After refluxing the mixture for 1 h, the reaction solution was cooled to room temperature. The reaction solution was poured into a saturated aqueous NaHCO<sub>3</sub> solution (100 mL), and the organic layer was then separated. The aqueous layer was extracted with dichloromethane (50 mL × 2), and the combined organic layer was dried over anhydrous Na<sub>2</sub>SO<sub>4</sub>. After the removal of the solvent by rotary evaporator, the crude product was chromatographed on a silica gel column (diameter: 5.5 cm, height: 11 cm, eluent: ethyl acetate/hexane = 1:2) to give compound **7** (3.23 g, 16.7 mmol) in 84% yield as a pale yellow solid.

$R_f = 0.46$  (silica gel: ethyl acetate/hexane = 1:2), m.p.: 46-48 °C; <sup>1</sup>H NMR (400 MHz, DMSO-*d*<sub>6</sub>, 298 K):  $\delta = 6.20$  (s, 1H, pyrrole), 3.77 (t,  $J = 7.2$  Hz, 2H, methylene), 2.44 (s, 3H, methyl), 2.22 (s, 3H, methyl), 2.17 (s, 3H, methyl), 1.51 (quint,  $J = 7.5$  Hz, 2H, methylene), 1.30 (sext,  $J = 7.4$  Hz, 2H, methylene), 0.90 ppm (t,  $J = 7.2$  Hz, 3H, methyl); <sup>13</sup>C{<sup>1</sup>H} NMR (100 MHz, DMSO-*d*<sub>6</sub>, 298 K):  $\delta = 193.3, 133.5, 127.0, 119.3, 108.0, 42.5, 32.0, 28.3, 19.5, 13.6, 11.8, 11.4$  ppm; IR(ATR, neat) 2961, 2954, 2871, 1643, 1518, 1417, 1362, 1343, 1232, 1214, 1184, 945, 923, 774, 623 cm<sup>-1</sup>; HRMS(ESI):  $m/z$  calcd for C<sub>12</sub>H<sub>19</sub>NONa<sup>+</sup>: 216.1359 [ $M$ +Na]<sup>+</sup>; found: 216.1356; elemental analysis calcd (%) for C<sub>12</sub>H<sub>19</sub>NO: C, 74.57; H, 9.91; N, 7.25; found: C, 74.62; H, 9.95; N, 7.23.



## 2-3 Synthesis of compound 8

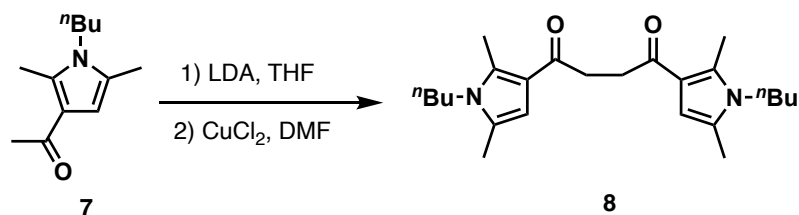

Compound **7** (1.74 g, 9.00 mmol) was added into a dropping funnel that equipped on a 200 mL three-neck flask. After the flask was cooled to  $-78^{\circ}\text{C}$  with  $\text{N}_2$  atmosphere, lithium diisopropylamide (LDA) solution (2M, 5.80 mL, 11.7 mmol) was added. Then anhydrous THF (15 mL) was added into the dropping funnel and the result solution of **7** was slowly added into flask over 15 min. After stirring for 15 min, a solution of  $\text{CuCl}_2$  (2.42 g, 18.0 mmol) in anhydrous DMF (40 mL) was added all at once. The reaction mixture was stirred for 1.5 h while kept the temperature at  $-78^{\circ}\text{C}$ . The mixture was quenched by saturated  $\text{NH}_4\text{Cl}$  aqueous solution (90 mL) after warming to room temperature and extracted by ether (90 mL  $\times$  3). The combined ether layer was washed by water (90 mL) and dried over  $\text{Na}_2\text{SO}_4$ , then concentrated by rotary evaporation to provide the residue. The crude was chromatographed by a silica gel column (diameter: 4 cm, height: 15 cm, eluent: ethyl acetate/hexane = 1:3) to give compound **8** (0.67 g, 1.7 mmol) in 39% as pale yellow solid.

$R_f = 0.29$  (silica gel: ethyl acetate/hexane = 1:3), m.p.:  $136\text{--}139^{\circ}\text{C}$ ;  $^1\text{H NMR}$  (400 MHz,  $\text{CDCl}_3$ , 298 K):  $\delta = 6.31$  (s, 2H, pyrrole), 3.74 (t,  $J = 7.6$  Hz, 4H, methylene), 3.11 (s, 4H, ethylene), 2.54 (s, 6H, methyl), 2.20 (s, 6H, methyl), 1.36 (sext,  $J = 7.5$  Hz, 4H, methylene), 0.96 ppm (t,  $J = 7.2$  Hz, 6H, methyl), one methylene peak was overlapped with water peak;  $^1\text{H NMR}$  (400 MHz,  $\text{DMSO-}d_6$ , 298 K):  $\delta = 6.26$  (s, 2H, pyrrole), 3.78 (t,  $J = 7.8$  Hz, 4H, methylene), 2.90 (s, 4H, ethylene), 2.44 (s, 6H, methyl), 2.18 (s, 6H, methyl), 1.52 (m, 4H, methylene), 1.31 (sext,  $J = 7.4$  Hz, 4H, methylene), 0.91 ppm (t,  $J = 7.4$  Hz, 6H, methyl);  $^{13}\text{C}\{^1\text{H}\}$  NMR (100 MHz,  $\text{CDCl}_3$ , 298 K):  $\delta = 196.3, 134.7, 127.3, 119.6, 107.9, 43.3, 34.8, 32.7, 20.2, 13.9, 12.4, 12.0$  ppm; IR(ATR, neat) 2967, 2918, 2872, 2856, 1635, 1519, 1417, 1361, 774, 418  $\text{cm}^{-1}$ ; HRMS(ESI):  $m/z$  calcd for  $\text{C}_{24}\text{H}_{36}\text{N}_2\text{O}_2\text{Na}^+$ : 407.2669  $[\text{M}+\text{Na}]^+$ ; found: 407.2657; elemental analysis calcd (%) for  $\text{C}_{24}\text{H}_{36}\text{N}_2\text{O}_2$ : C, 74.96; H, 9.44; N, 7.28; found: C, 75.12; H, 9.48; N, 7.24; UV-Vis (MeCN):  $\lambda_{\text{max}}$  ( $\epsilon$ ) = 212 ( $3.0 \times 10^4$ ), 250 ( $2.1 \times 10^4$ ), 285 nm ( $1.6 \times 10^4$   $\text{L mol}^{-1} \text{cm}^{-1}$ ).

## 2-4 Synthesis of compound 9

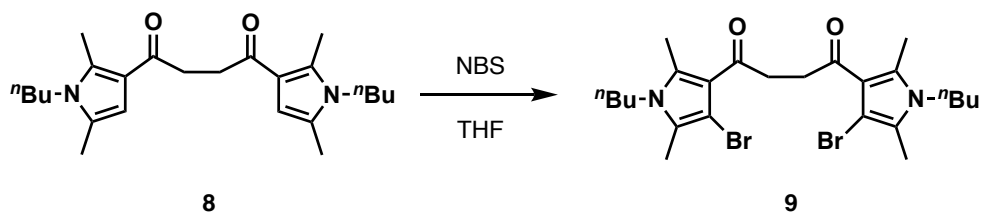

Compound **8** (461 mg, 1.20 mmol) was added to a 50 mL round bottom flask and dissolved in 12 mL THF (with 0.03% stabilizer). Then, a solution of 428 mg N-bromosuccinimide (NBS) (2.40 mmol) in 12 mL THF (with 0.03% stabilizer) was added dropwise. After keeping stirring 15 min, the solvent was removed by rotary evaporation. The residue was ultrasonic dispersed in EtOH (2.4 mL) and filtered. The result solid was washed by EtOH (1 mL) and water (10 mL) to provide compound **9** as pale solid (569 mg, 1.05 mmol) in 88%.

$^1\text{H}$  NMR (400 MHz,  $\text{CDCl}_3$ , 298 K):  $\delta$  = 3.78 (t,  $J$  = 7.8 Hz, 4H, methylene), 3.38 (s, 4H, ethylene), 2.48 (s, 6H, methyl), 2.23 (s, 6H, methyl), 1.36 (sext,  $J$  = 7.5 Hz, 4H, methylene), 0.96 ppm (t,  $J$  = 7.2 Hz, 6H, methyl), one methylene peak was overlapped with water peak;  $^1\text{H}$  NMR (400 MHz, acetone- $d_6$ , 298 K):  $\delta$  = 3.92 (t,  $J$  = 7.8 Hz, 4H, methylene), 3.27 (s, 4H, ethylene), 2.44 (s, 6H, methyl), 2.25 (s, 6H, methyl), 1.62 (m, 4H, methylene), 1.39 (sext,  $J$  = 7.4 Hz, 4H, methylene), 0.95 ppm (t,  $J$  = 7.2 Hz, 6H, methyl);  $^{13}\text{C}\{^1\text{H}\}$  NMR (100 MHz,  $\text{CDCl}_3$ , 298 K):  $\delta$  = 196.2, 134.9, 126.4, 119.9, 94.8, 44.3, 37.2, 32.7, 20.1, 13.9, 12.5, 11.3 ppm; IR(ATR, neat) 2953, 2931, 2863, 1638, 1499, 1412, 1392, 1193, 968, 424  $\text{cm}^{-1}$ ; HRMS(ESI):  $m/z$  calcd for  $\text{C}_{24}\text{H}_{34}\text{Br}_2\text{N}_2\text{O}_2\text{Na}^+$ : 565.0859 [ $M+\text{Na}$ ] $^+$ ; found: 565.0850; elemental analysis calcd (%) for  $\text{C}_{24}\text{H}_{34}\text{Br}_2\text{N}_2\text{O}_2$ : C, 53.15; H, 6.32; N, 5.17; found: C, 53.17; H, 6.30; N, 5.04; UV-Vis (MeCN):  $\lambda_{\text{max}}$  ( $\epsilon$ ) = 212 ( $2.5 \times 10^4$ ), 254 ( $1.8 \times 10^4$ ), 279 nm ( $1.2 \times 10^4 \text{ L mol}^{-1} \text{ cm}^{-1}$ ).

## 2-5 Synthesis of compounds 10 and 12

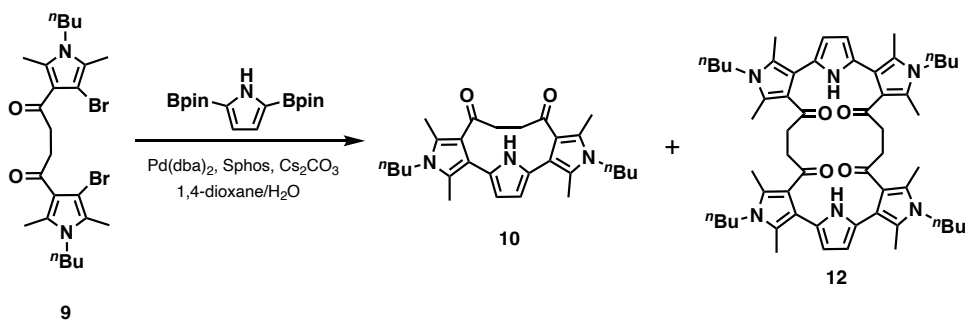

To a 50 mL 2-necked flask equipped with a reflux condenser, compound **9** (245 mg, 0.450 mmol), 2,5-bis(4,4,5,5-tetramethyl-1,3,2-dioxaborolan-2-yl)-1H-pyrrole<sup>S4</sup> (156 mg, 0.490 mmol), bis(dibenzylideneacetone)palladium(0) (Pd(dba)<sub>2</sub>) (26 mg, 0.045 mmol), dicyclohexyl(2',6'-dimethoxy[1,1'-biphenyl]-2-yl)phosphane (Sphos) (37 mg, 0.090 mmol), Cs<sub>2</sub>CO<sub>3</sub> (880 mg, 2.70 mmol) were added. Fill the flask with N<sub>2</sub> atmosphere then added degassed 1,4-dioxane (1.5 mL) and water (75 μL). The mixture was heated to 100 °C for 1 h, then remove the solvent under reduced pressure. Added 10 mL water into the flask and extracted by dichloromethane (10 mL × 3). The combined dichloromethane layer provided the crude after drying by Na<sub>2</sub>SO<sub>4</sub> and rotary evaporation. The crude was chromatographed on a silica gel column (diameter: 3 cm, height: 15 cm, eluent: ethyl acetate/hexane = 2:3) to provide the two fractions (*R<sub>f</sub>* = 0.21 and *R<sub>f</sub>* = 0.35). Fraction (*R<sub>f</sub>* = 0.21) provided 97 mg mixture containing compound **10** and pure compound **10** (48 mg, 0.107 mmol, 24%) as grey powder was obtained by recrystallization in MeOH (7.5 mL). Fraction (*R<sub>f</sub>* = 0.35) required further GPC-HPLC separation followed a short silica gel column purification to provide small amount of compound **12** (c.a. 1 mg).

### Compound 10

*R<sub>f</sub>* = 0.21 (silica gel: ethyl acetate/hexane = 2:3); <sup>1</sup>H NMR (400 MHz, CDCl<sub>3</sub>, 298 K): δ = 8.15 (br, 1H, pyrrole), 6.09 (d, *J* = 2.8 Hz, 2H, pyrrole), 3.79 (t, *J* = 8.0 Hz, 4H, methylene), 2.40 (s, 6H, methyl), 2.35 (s, 4H, ethylene), 2.34 (s, 6H, methyl), 1.41 (sext, *J* = 7.4Hz, 4H, methylene), 0.98 ppm (t, *J* = 7.4Hz, 6H, methyl), one methylene peak was overlapped with water peak; <sup>1</sup>H NMR (400 MHz, acetone-*d*<sub>6</sub>, 328 K): δ = 9.81 (br, 1H, pyrrole), 6.00 (d, *J* = 2.0 Hz, 2H, pyrrole), 3.91 (t, *J* = 7.8 Hz, 4H, methylene), 2.39 (s, 6H, methyl), 2.34 (s, 6H, methyl), 2.25 (s, 4H, ethylene), 1.68 (m, 4H, methylene), 1.45 (sext, *J* = 7.4Hz, 4H, methylene), 1.00 ppm (t, *J* = 7.4Hz, 6H, methyl); <sup>13</sup>C{<sup>1</sup>H} NMR (100 MHz, CDCl<sub>3</sub>, 298 K): δ = 199.8, 134.4, 125.4, 125.3, 123.4, 112.5, 110.8, 43.8, 40.1, 32.8, 20.3, 13.9, 11.7, 10.6 ppm; IR(ATR, neat) 3338, 2957, 2929, 2869, 1646, 1606, 1508, 1407, 784, 769 cm<sup>-1</sup>; HRMS(ESI): *m/z* calcd for C<sub>28</sub>H<sub>37</sub>N<sub>3</sub>O<sub>2</sub>Na<sup>+</sup>: 470.2778 [*M*+Na]<sup>+</sup>; found: 470.2768; elemental analysis calcd (%) for C<sub>28</sub>H<sub>37</sub>N<sub>3</sub>O<sub>2</sub>: C, 75.13; H, 8.33; N, 9.39; found: C, 74.96; H, 8.39; N, 9.30; UV-Vis (MeCN): λ<sub>max</sub> (ε) = 241 nm (2.6 × 10<sup>4</sup> L mol<sup>-1</sup> cm<sup>-1</sup>).

### Compound 12

$R_f = 0.35$  (silica gel: ethyl acetate/hexane = 2:3);  $^1\text{H}$  NMR (400 MHz,  $\text{CDCl}_3$ , 298 K):  $\delta = 10.16$  (br, 2H, pyrrole), 6.09 (d,  $J = 2.4$  Hz, 4H, pyrrole), 3.76 (t,  $J = 7.6$  Hz, 8H, methylene), 2.61 (s, 8H, methylene), 2.35 (s, 12H, methyl), 2.22 (s, 12H, methyl), 1.38 (sext,  $J = 7.4$  Hz, 8H, methylene), 0.96 ppm (t,  $J = 7.2$  Hz, 12H, methyl), one methylene peak overlap with water peak;  $^{13}\text{C}\{^1\text{H}\}$  NMR (100 MHz,  $\text{CDCl}_3$ , 298 K):  $\delta = 198.4, 133.8, 126.9, 125.6, 120.7, 113.8, 109.0, 43.6, 36.1, 32.9, 20.3, 13.9, 12.2, 11.1$  ppm; HRMS(ESI):  $m/z$  calcd for  $\text{C}_{56}\text{H}_{74}\text{N}_6\text{O}_4\text{Na}^+$ : 917.5664  $[M+\text{Na}]^+$ ; found: 917.5654.

## 2-6 Synthesis of compound 11

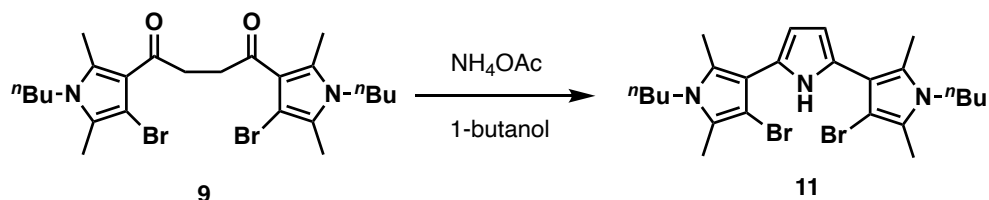

To a 100 mL Schlenk flask with flat stopper, compound **9** (864 mg, 1.60 mmol),  $\text{NH}_4\text{OAc}$  (2.47g, 32.0 mmol) and 1-butanol (27 mL) were added. Heating the flask to 105 °C then closed the switch and kept 90 min. The solution was cooled to room temperature and washed by 120 mL saturated  $\text{NaHCO}_3$  aqueous solution. The organic layer was separated and extracted the aqueous layer by dichloromethane (40 mL  $\times$  2). The combined organic layer was dried over  $\text{Na}_2\text{SO}_4$  and followed by rotary evaporation to obtain the concentrated residue. After a silica gel column chromatograph (diameter: 3 cm, height: 10 cm, eluent: dichloromethane/hexane = 1:2), compound **11** (500 mg, 0.955 mmol) in 60% yield as a colorless solid.

$R_f = 0.35$  (silica gel: dichloromethane/hexane = 1:2);  $^1\text{H NMR}$  (400 MHz,  $\text{CDCl}_3$ , 298 K):  $\delta = 8.88$  (br, 1H, pyrrole), 6.19 (d,  $J = 2.0$  Hz, 2H, pyrrole), 3.79 (t,  $J = 7.8$  Hz, 4H, methylene), 2.36 (s, 6H, methyl), 2.25 (s, 6H, methyl), 1.61 (m, 4H, methylene), 1.38 (sext,  $J = 7.4$  Hz, 4H, methylene), 0.97 ppm (t,  $J = 7.4$  Hz, 6H, methyl);  $^{13}\text{C}\{^1\text{H}\}$  NMR (100 MHz,  $\text{CDCl}_3$ , 298 K):  $\delta = 125.00, 124.98, 124.5, 112.6, 107.4, 93.8, 44.7, 33.2, 20.2, 14.0, 11.6, 11.1$  ppm; IR(ATR, neat) 3442, 2956, 2926, 2861, 1337, 1046, 762, 527  $\text{cm}^{-1}$ ; HRMS(ESI):  $m/z$  calcd for  $\text{C}_{24}\text{H}_{32}\text{Br}_2\text{N}_3^-$ : 522.0948 [ $M-H$ ] $^-$ ; found: 522.0960; elemental analysis calcd (%) for  $\text{C}_{24}\text{H}_{33}\text{Br}_2\text{N}_3$ : C, 55.08; H, 6.36; N, 8.03; found: C, 55.02; H, 6.35; N, 7.89; UV-Vis (MeCN):  $\lambda_{\text{max}}$  ( $\epsilon$ ) = 278 nm ( $1.8 \times 10^4$  L  $\text{mol}^{-1}$   $\text{cm}^{-1}$ ).

## 2-7 Synthesis of compound 3

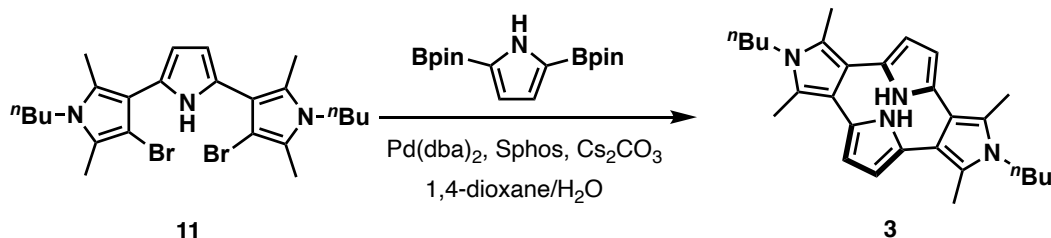

To a 50 mL 2-necked flask equipped with a reflux condenser, compound **11** (418 mg, 0.80 mmol), 2,5-bis(4,4,5,5-tetramethyl-1,3,2-dioxaborolan-2-yl)-1H-pyrrole<sup>S4</sup> (281 mg, 0.88 mmol), bis(dibenzylideneacetone)palladium(0) (Pd(dba)<sub>2</sub>) (46 mg, 0.080 mmol), dicyclohexyl(2',6'-dimethoxy[1,1'-biphenyl]-2-yl)phosphane (Sphos) (66 mg, 0.16 mmol), 1.56 g Cs<sub>2</sub>CO<sub>3</sub> (4.80 mmol) were added. Fill the flask with N<sub>2</sub> then added degassed 1,4-dioxane (2.67 mL) and water (130 μL) into the flask by syringe. The mixture was heated to 100 °C for 90 min then remove the solvent under reduced pressure. Added 25 mL water into the flask and extracted the aqueous layer by dichloromethane (20 mL × 3). The combined dichloromethane layer was dried over Na<sub>2</sub>SO<sub>4</sub> followed rotary evaporation to provide the crude. The crude was chromatographed on a silica gel column (diameter: 3 cm, height: 19 cm, eluent: dichloromethane/hexane = 2:1) to give compound **3** (87 mg, 0.20 mmol) in 25% yield as colorless solid.

$R_f = 0.70$  (silica gel: dichloromethane/hexane = 2:1); <sup>1</sup>H NMR (400 MHz, CDCl<sub>3</sub>, 298 K):  $\delta = 6.34$  (br, 2H, pyrrole), 6.21 (d,  $J = 2.0$  Hz, 4H, pyrrole), 3.77 (m, 4H, methylene), 2.40 (s, 12H, methyl), 1.69 (quint,  $J = 7.5$  Hz, 4H, methylene), 1.44 (sext,  $J = 7.4$  Hz, 4H, methylene), 1.00 ppm (t,  $J = 7.4$  Hz, 6H, methyl); <sup>13</sup>C {<sup>1</sup>H} NMR (100 MHz, CDCl<sub>3</sub>, 298 K):  $\delta = 130.1, 122.9, 116.5, 113.5, 44.0, 33.4, 20.4, 14.0, 10.9$  ppm; IR(ATR, neat) 3422, 2950, 2925, 2864, 1595, 1473, 1403, 1031, 762 cm<sup>-1</sup>; HRMS(ESI):  $m/z$  calcd for C<sub>28</sub>H<sub>36</sub>N<sub>4</sub>Na<sup>+</sup>: 451.2833 [ $M$ +Na]<sup>+</sup>; found: 451.2822; UV-Vis (MeCN):  $\lambda_{max}$  ( $\epsilon$ ) = 276 nm ( $4.3 \times 10^4$  L mol<sup>-1</sup> cm<sup>-1</sup>).

## 2-8 Paal-Knorr condition for compound 10

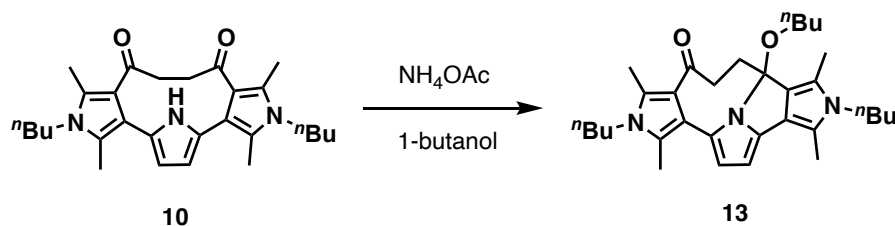

In a 10 mL Schlenk flask with flat stopper, compound **10** (48.0 mg, 0.100 mmol),  $\text{NH}_4\text{OAc}$  (154 mg, 2.00 mmol) and 1-butanol (1.70 mL) were added. Heating the flask to 115 °C then closed the switch and kept 6 h. The solution was cooled to room temperature and washed by 100 mL saturated  $\text{NaHCO}_3$  aqueous solution. The organic layer was separated and extracted the aqueous layer by dichloromethane (5 mL  $\times$  3). The combined organic layer was dried over  $\text{Na}_2\text{SO}_4$  and followed by rotary evaporation to obtain the concentrated residue. After a silica gel column chromatograph (diameter: 2 cm, height: 13 cm, eluent: ethyl acetate/hexane = 2:3), compound **13** (13.0 mg, 0.0258 mmol, 26%) was obtained as yellow oil.

### Characterization data for compound 13

$R_f=0.61$  (silica gel: ethyl acetate/hexane = 2:3);  $^1\text{H NMR}$  (400 MHz,  $\text{CDCl}_3$ , 298 K):  $\delta$  = 6.14 (d,  $J$  = 3.2 Hz, 1H, pyrrole), 6.00 (d,  $J$  = 3.6 Hz, 1H, pyrrole), 3.86-3.75 (m, 2H, methylene), 3.67 (t,  $J$  = 7.4 Hz, 2H, methylene), 3.18-3.10 (m, 1H, ethylene), 3.07-3.02 (m, 1H, ethylene), 2.89-2.81 (m, 1H, ethylene), 2.67-2.61 (m, 1H, ethylene), 2.59 (s, 3H, methyl), 2.30 (s, 6H, methyl), 2.21-2.16 (m, 2H, methylene), 2.14 (s, 3H, methyl), 1.45-1.31 (m, 6H, methylene), 0.99-0.92 (m, 6H, methyl), 0.59 ppm (t,  $J$  = 7.0 Hz, 3H, methyl), one methylene peak overlap with water peak;  $^{13}\text{C}\{^1\text{H}\}$  NMR (100 MHz,  $\text{CDCl}_3$ , 298 K):  $\delta$  = 199.0, 133.8, 132.5, 127.8, 125.4, 124.9, 120.1, 119.7, 115.8, 115.7, 113.6, 112.0, 95.9, 95.2, 63.6, 43.5, 41.8, 37.6, 33.3, 32.9, 31.5, 20.3, 20.2, 19.0, 14.0, 13.94, 13.92, 11.9, 11.8, 11.4, 10.4 ppm, one pyrrolic carbon peak may overlapped; HRMS(ESI):  $m/z$  calcd for  $\text{C}_{32}\text{H}_{45}\text{N}_3\text{O}_2\text{Na}^+$ : 526.3404 [ $M+\text{Na}$ ] $^+$ ; found: 526.3394.

### 3. Single Crystal X-ray Diffraction Analysis

#### 3-1 Crystallographic data for compound 10

Single crystals suitable for X-ray diffraction analysis were grown by vapor diffusion of hexane into a chloroform solution of compound 10.

$C_{28}H_{37}N_3O_2$ ,  $M = 447.60$ , crystal size:  $0.68 \times 0.35 \times 0.22 \text{ mm}^3$ , monoclinic, space group  $P2_1/n$ ,  $a = 12.8130(5)$ ,  $b = 13.3344(5)$ ,  $c = 14.2787(6) \text{ \AA}$ ,  $\alpha = 90$ ,  $\beta = 91.632(4)$ ,  $\gamma = 90^\circ$ ,  $V = 2438.58(17) \text{ \AA}^3$ ,  $Z = 4$ ,  $T = 123(2) \text{ K}$ ,  $\mu = 0.077 \text{ mm}^{-1}$ ,  $D_{\text{calc}} = 1.219 \text{ g/cm}^3$ ,  $2.090 \leq \theta \leq 27.498$ , 4750 unique reflections out of 5478 with  $I > 2\sigma(I)$ ,  $\text{GOF} = 1.004$ ,  $R_1 = 0.0419$  and  $wR_2 = 0.1063$  for all data, CCDC deposit number: 2382890.

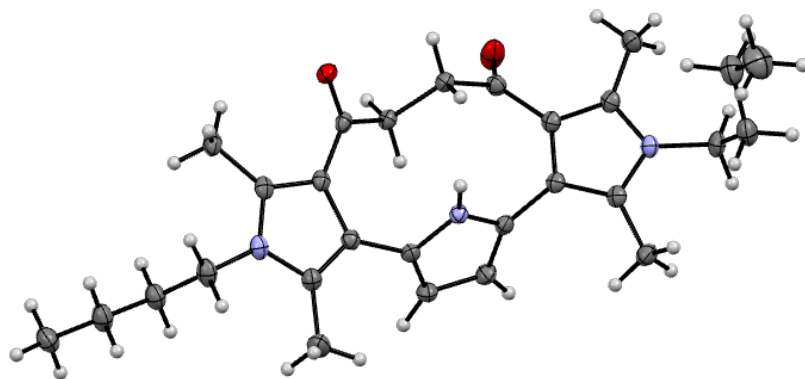

**Fig. S1** ORTEP drawing of crystal structure of compound 10 at the 50% thermal probability level.



### 3-2 Crystallographic data for compound 3

Single crystals suitable for X-ray diffraction analysis were grown by vapor diffusion of hexane into a dichloromethane solution of compound 3.

$C_{28}H_{36}N_4$ ,  $M = 428.61$ , crystal size:  $0.50 \times 0.15 \times 0.04 \text{ mm}^3$ , triclinic, space group  $P-1$ ,  $a = 9.0906(8)$ ,  $b = 9.1054(5)$ ,  $c = 9.2735(5) \text{ \AA}$ ,  $\alpha = 62.149(6)$ ,  $\beta = 61.589(7)$ ,  $\gamma = 65.472(7)^\circ$ ,  $V = 578.30(9) \text{ \AA}^3$ ,  $Z = 1$ ,  $T = 123(2) \text{ K}$ ,  $\mu = 0.073 \text{ mm}^{-1}$ ,  $D_{\text{calc}} = 1.231 \text{ g/cm}^3$ ,  $2.612 \leq \theta \leq 26.999^\circ$ , 2268 unique reflections out of 2469 with  $I > 2\sigma(I)$ , GOF = 1.039,  $R_1 = 0.0407$  and  $wR_2 = 0.1035$  for all data. CCDC deposit number: 2382889.

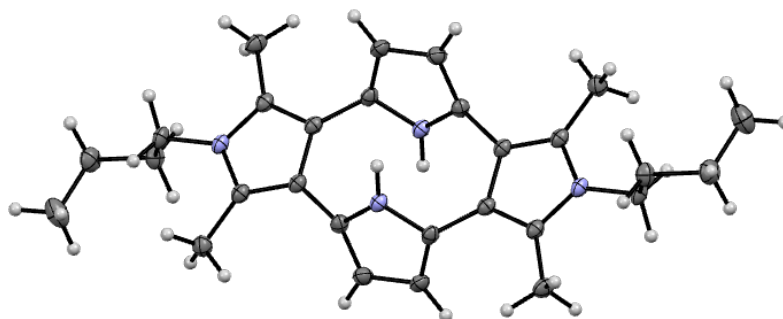

**Fig. S2** ORTEP drawing of crystal structure of compound 3 at the 50% thermal probability level.

## 4. StrainViz Analysis

### 4-1 Computational details

Geometry optimization and vibration analysis of the three compounds (**3**, **4**, and **10**) were performed by the global reaction route mapping (GRRM) program.<sup>S5</sup> The initial structures were prepared from the crystal structures determined in the present work for **3** and **10** and that<sup>S6</sup> determined by Morimoto et al. for **4**. The vibrational frequencies were computed to confirm whether the optimized geometry corresponded to stationary or saddle points on potential energy surface. The density functional theory (DFT) calculations were carried out at the M06-2X<sup>S7</sup>/6-311+G(2d,p) level of theory implemented in the Gaussian 16 program.<sup>S8</sup>

Strains of each macrocycle were computed by the StrainViz program<sup>S9</sup> at the same DFT level of theory as the geometry optimization calculations. The DFT structure was divided into four fragments with same manner to evaluate four types of strain (total, bond, angle, and dihedral). The strain representation was visualized by the visual molecular dynamics (VMD) software.<sup>S10</sup> For **3** and **4**, the StrainViz analyses at the B3LYP+D3<sup>S11-15</sup>/6-311+G(2d,p) level of theory were additionally examined to confirm influences of the adopted functionals.

Structural and energy changes of the four fragments used in the StrainViz analysis are supplementary summarized in Fig. S3.

**(a) Compound 3**

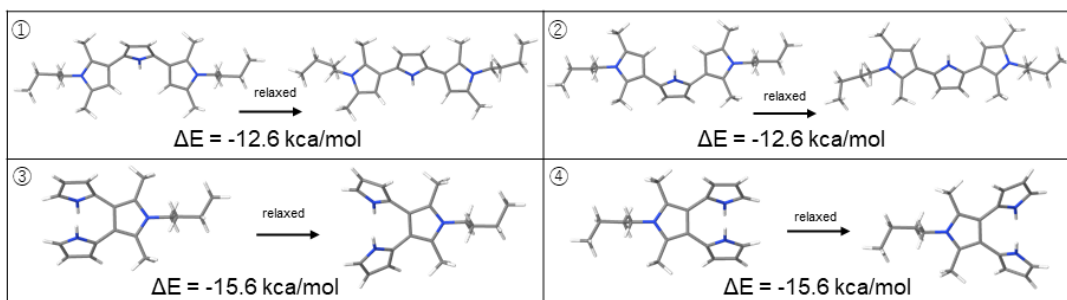

**(b) Compound 4**

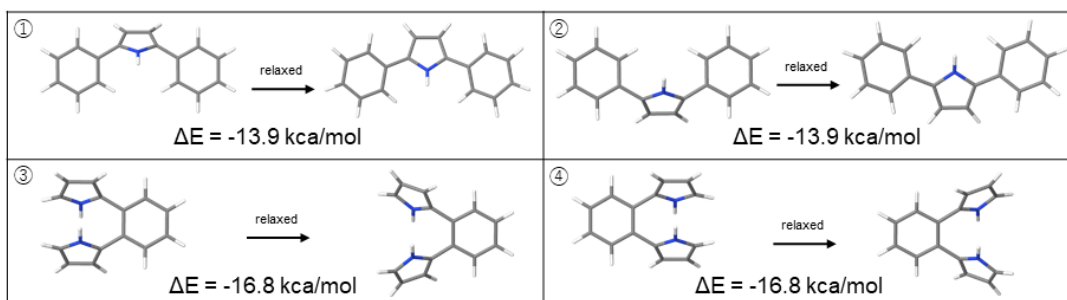

**(c) Compound 10**

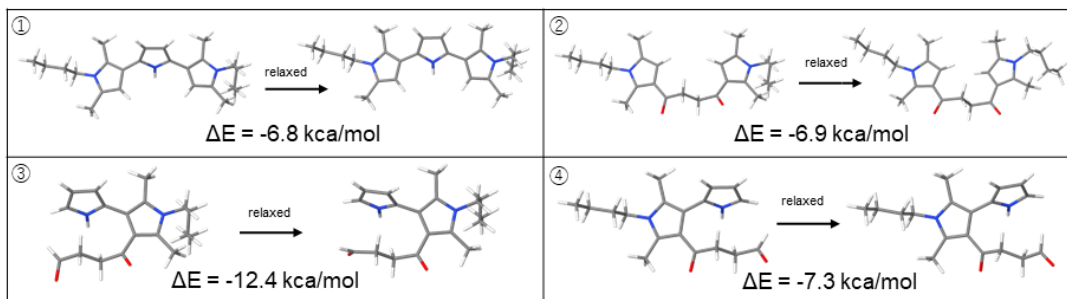

**Fig. S3** Fragmentation manner of each macrocycle. Structural and energy changes of the four fragments through strain release are also shown. Atom colors are assigned as follows: white (hydrogen), gray (carbon), blue (nitrogen), and red (oxygen).

## 4-2 Major contribution of total strain

From Fig. 3d in the main text, it is found that the dihedral strain is a major contribution of the total strain. Fig. S4 (b and c) show visualized comparison of dihedral and total strains. For each macrocycle, the distribution pattern of dihedral strain is similar to that of total one. Particularly, the larger strains are likely to appear at the C–C bonds linking the subrings.

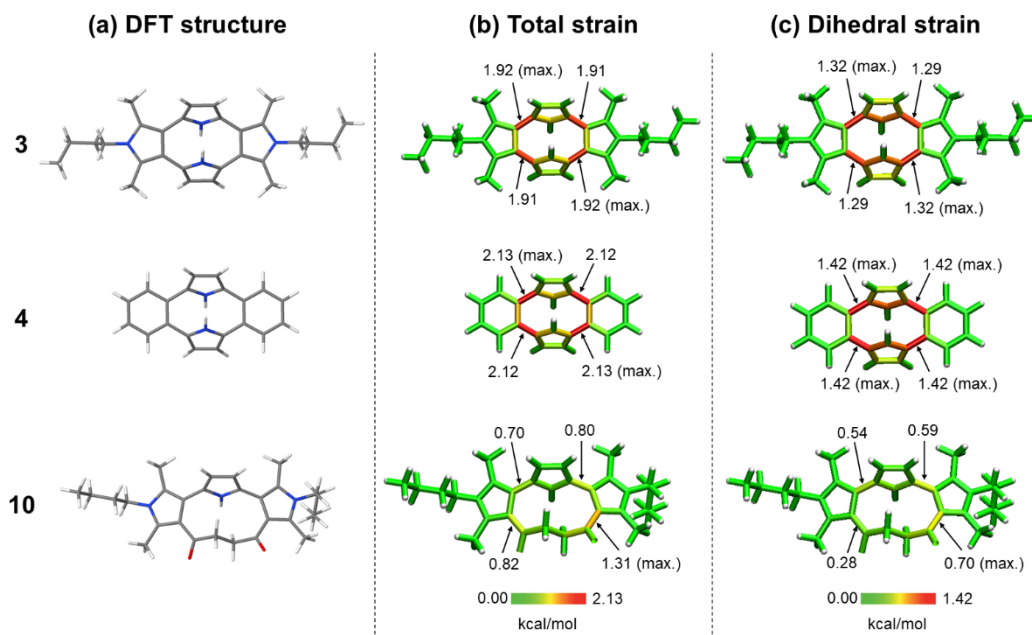

**Fig. S4** Visualized comparison of dihedral and total strains. (a) DFT structure, (b) total strain, and (c) dihedral strain. In (a), atom colors are assigned as follows: white (hydrogen), gray (carbon), blue (nitrogen), and red (oxygen).

### 4-3 Rationalization for difference of total/dihedral strain between 3 and 4

The total strain of **3** is slightly smaller than that of **4**. The individual fragment shown in Fig. S3 also exhibits larger strains at the C-C bonds between two aromatic rings. Especially, dihedral strains of the fragment 1 (or 2) are identified as major contributions at the strained C-C bonds. Fig. S5a shows relative energy changes for the structural relaxation of fragment 1. For **3**, the steric effect between methyl groups and pyrrole might affect the strain energy and torsional motion, which resulted in less strain.

Fig. S5b shows selected geometrical parameters for the macrocycles of **3** and **4**. Judging from the parameters, **4** has the narrower cavity than that of **3**, which resulted in a larger total strain.

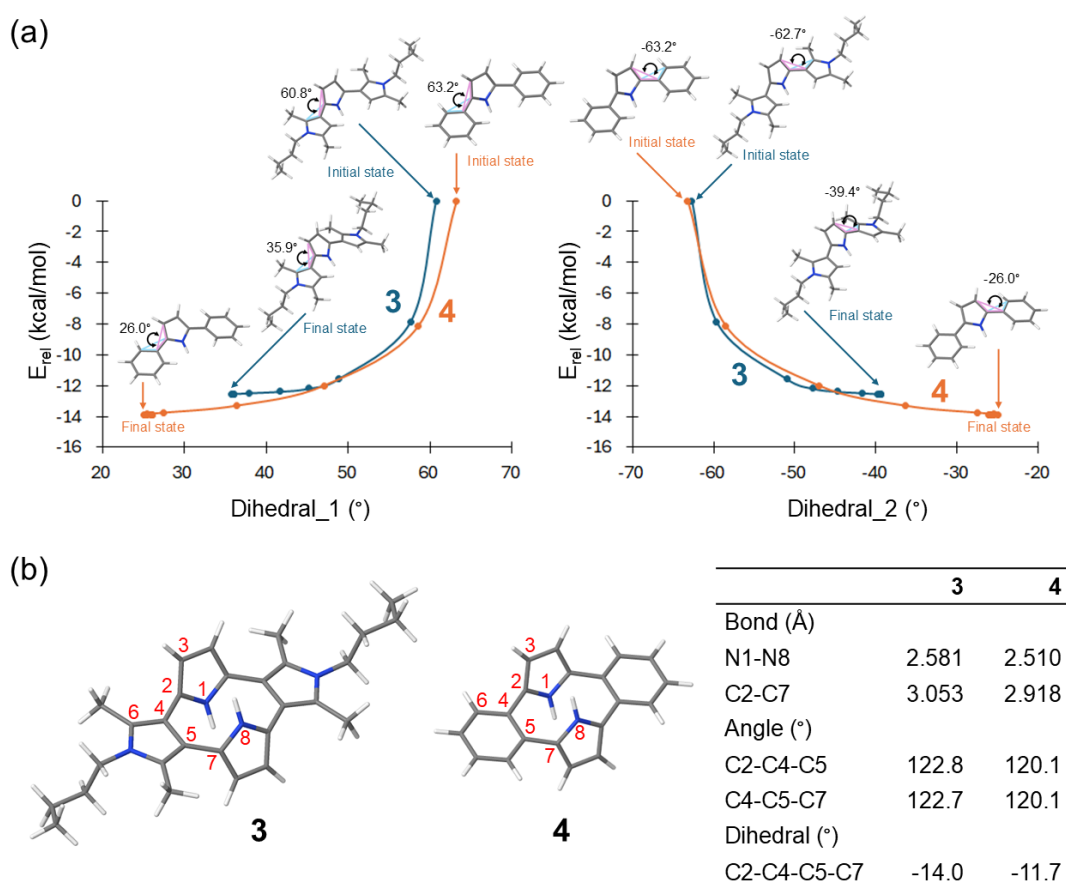

**Fig. S5** Differences in geometrical and energy changes between **3** and **4**. (a) relative energy changes as a function of dihedral angle through the structural relaxation of fragment 1. (b) selected geometrical parameters of macrocycles.

#### 4-4 DFT dependency of computed strains

In Fig. S6, computed strains by the B3LYP+D3 method are compared to those by the M06-2X method. In (a), the strain distribution and maximum values of each macrocycle are found to be the similar manner between the two evaluations. In (b), although the computed values by the B3LYP+D3 method are slightly larger than those by the M06-2X method, there is no change for the order of total strains between **3** and **4** and the contribution of individual strain. Therefore, the selection of functionals does not influence the present evaluation.

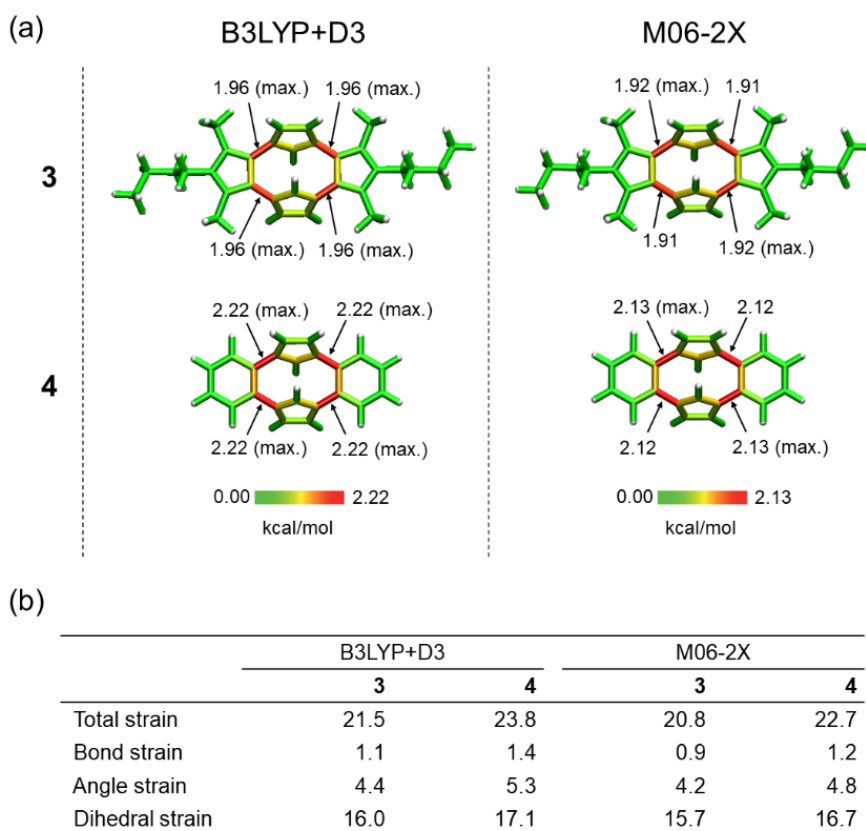

**Fig. S6** Comparison of StrainViz analyses computed at two different DFT methods. (a) Visualization of the total strain of **3** and **4**. (b) Calculated total, bond, angle, and dihedral strain energies (in kcal/mol) of **3** and **4**.

## 5. UV-Vis Absorption Spectra

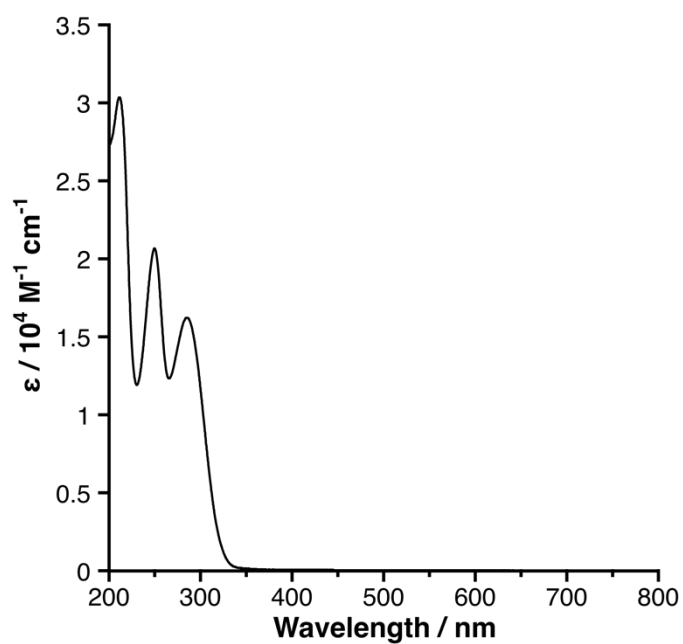

**Fig. S7** UV-Vis absorption spectrum of compound **8** in MeCN ( $\lambda_{\text{max}} = 212, 250, 285 \text{ nm}$ ).

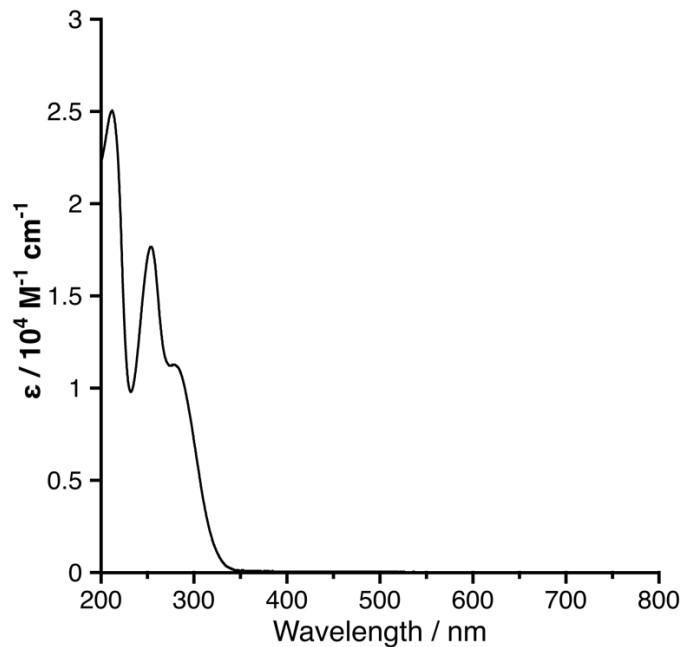

**Fig. S8** UV-Vis absorption spectrum of compound **9** in MeCN ( $\lambda_{\text{max}} = 212, 254, 279 \text{ nm}$ ).

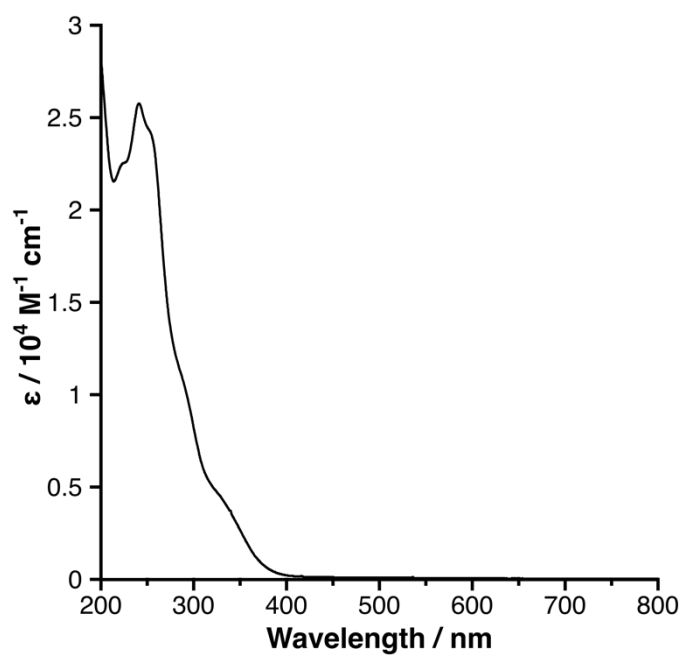

**Fig. S9** UV-Vis absorption spectrum of compound **10** in MeCN ( $\lambda_{\text{max}} = 241 \text{ nm}$ ).

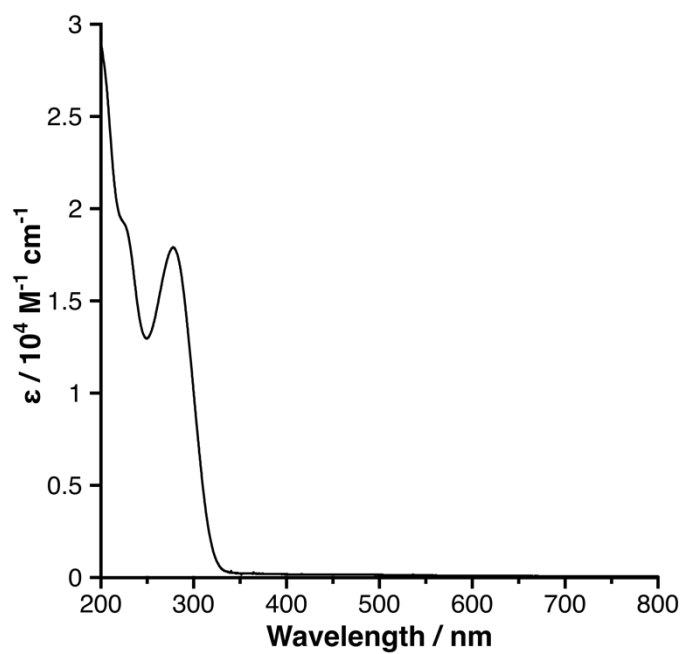

**Fig. S10** UV-Vis absorption spectrum (solid line) of compound **11** in MeCN ( $\lambda_{\text{max}} = 278 \text{ nm}$ ).



## 6. Fluorescence Lifetime Measurement

a)

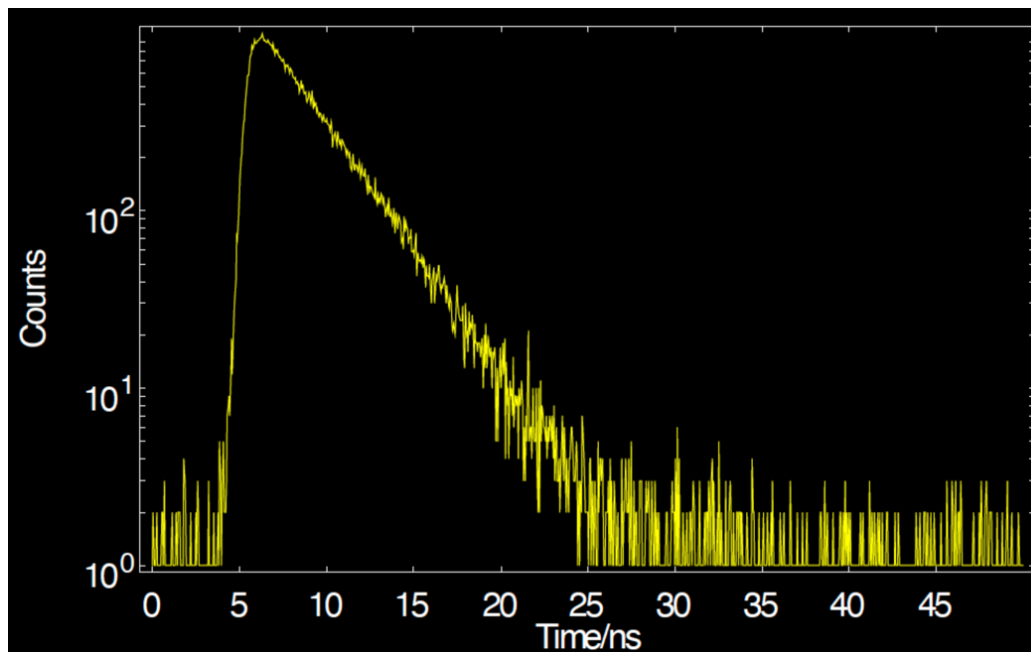

b)

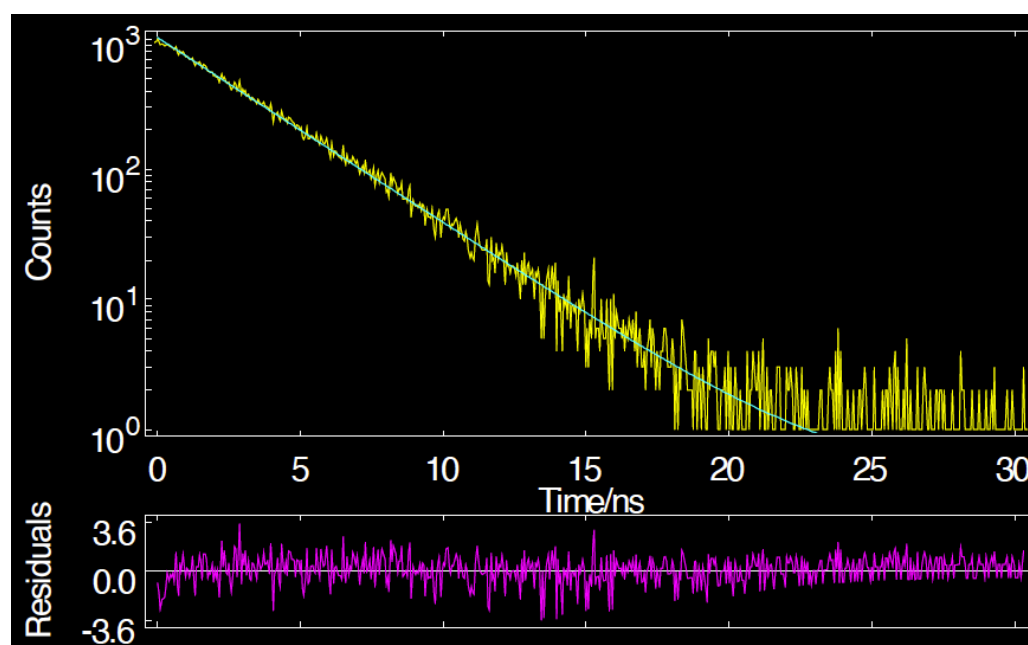

**Fig. S11** (a) Emission decay and (b) fitting analysis of compound **3** in CH<sub>3</sub>CN ( $\tau = 3.05$  ns,  $\chi^2 = 1.004$ ,  $\lambda_{\text{ex}}$ : 270 nm,  $\lambda_{\text{obs}}$ : 435 nm).

## 7. Electrochemical Measurement

### 7-1 Cyclic voltammetry

Three-electrode system; solvent: CH<sub>2</sub>Cl<sub>2</sub>; electrolyte: 0.1 M *n*-Bu<sub>4</sub>NPF<sub>6</sub>; working electrode: Pt; counter electrode: Pt wire; reference electrode: Ag/AgNO<sub>3</sub>; scan rate: 0.05 V/s; The three-electrode system was purged with N<sub>2</sub>. Ferrocene (Fc) was used as external standards.

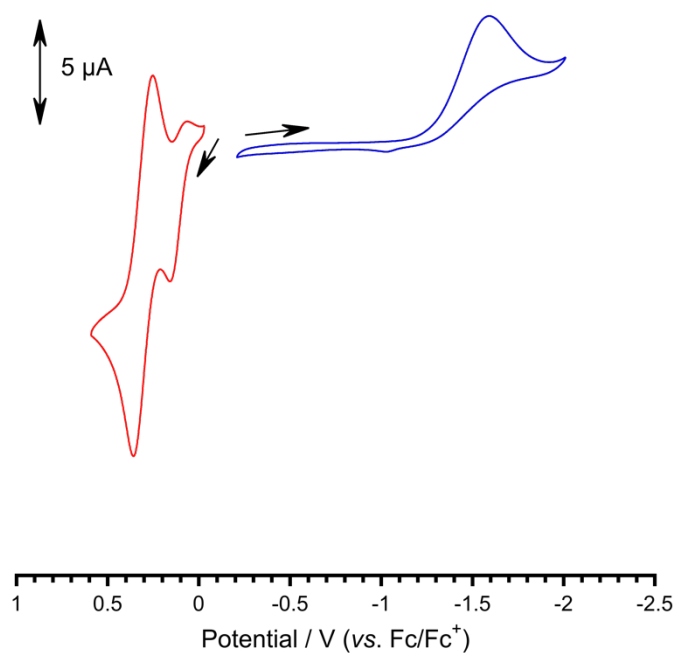

**Fig. S12** Cyclic voltammetry curves of compound **10** (red: oxidation; blue: reduction).

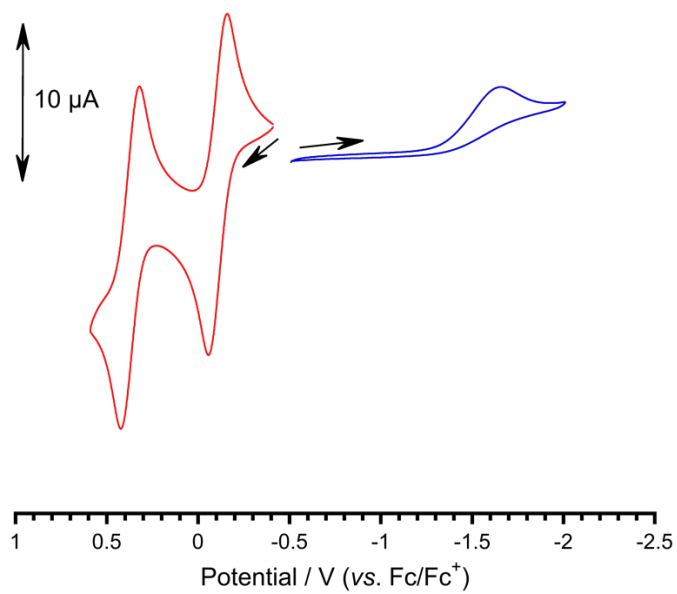

**Fig. S13** Cyclic voltammetry curves of compound **11** (red: oxidation; blue: reduction).

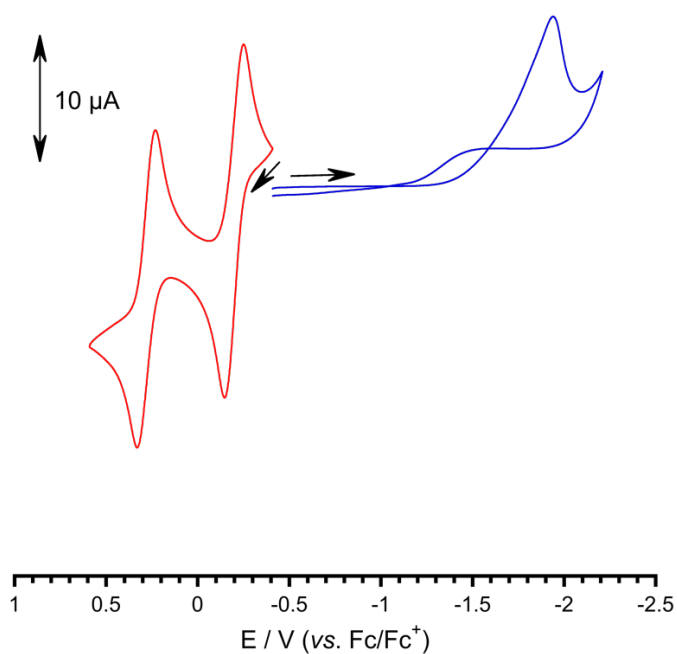

**Fig. S14** Cyclic voltammetry curves of compound **3** (red: oxidation; blue: reduction).

## 8. DFT Calculation

### 8-1 Computational details

All calculations were carried out using the *Gaussian 16* program.<sup>S8</sup> The calculations were performed by the density functional theory (DFT) method with the indicated functional (B3LYP,  $\omega$ B97XD, or CAM-B3LYP), employing a basis set 6-311G(d) for C, H, and N. SMD solvation model with CH<sub>2</sub>Cl<sub>2</sub> as a continuum description of the solvent was applied for the relative energy comparison and simulation of the UV/Vis spectra via time-dependent DFT method. All structures were fully optimized without any symmetry restriction. Calculated frequencies were used to verify the nature of all stationary points as minima (no imaginary frequencies). The NICS values were obtained with the GIAO method. The ring centers for the NICS values were designated at the nonweighted means of the carbon and nitrogen coordinates.<sup>S15,S16</sup> The anisotropy of the induced current density (ACID) calculation was conducted with the CSGT method, in which the external magnetic field was applied in the direction from the back of the paper to the surface.<sup>S17,S18</sup>

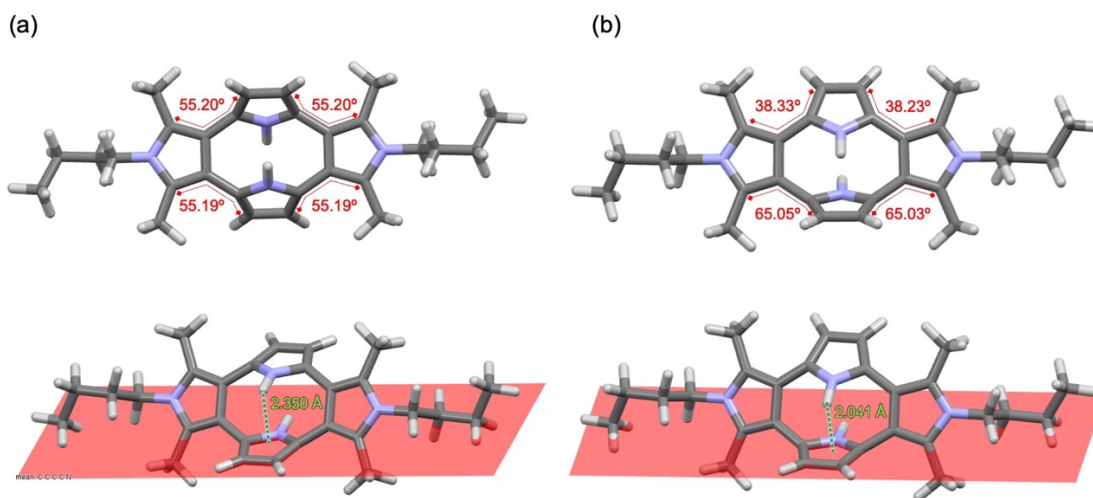

**Fig. S15** Optimized structures and structural details of (a) **3** and (b) **3\*+** at (U)B3LYP/6-311G(d,p) level.

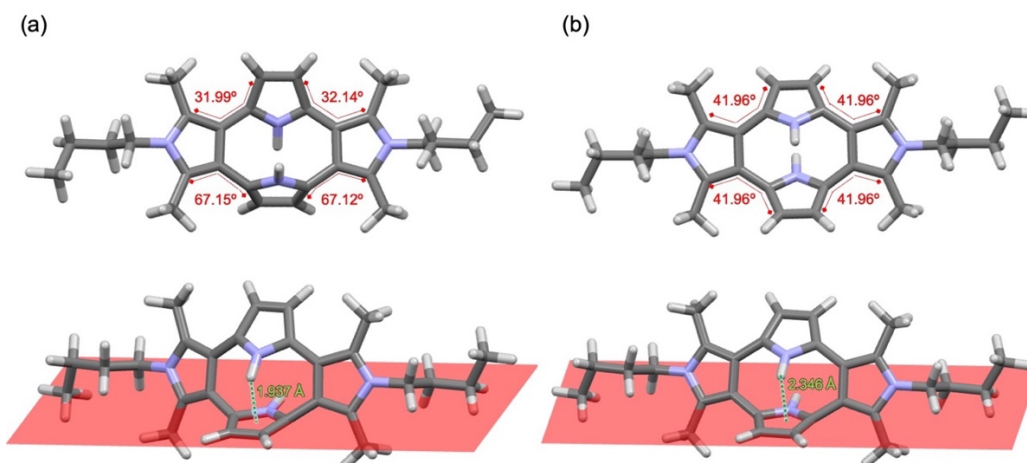

**Fig. S16** Optimized structures and structural details of  $3^{2+}$ . (a) Closed-shell singlet with (R)B3LYP/6-311G(d,p) level and (b) open-shell triplet with (U)B3LYP/6-311G(d,p) level.

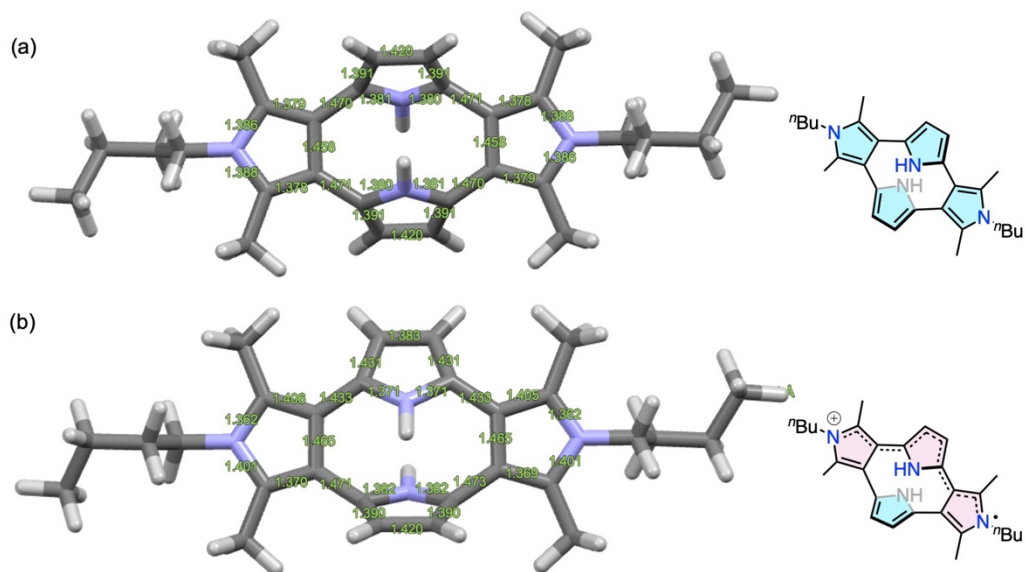

**Fig. S17** Selected bond lengths (in Å) of the optimized structures of (a) **3** and (b) **3<sup>2+</sup>**.

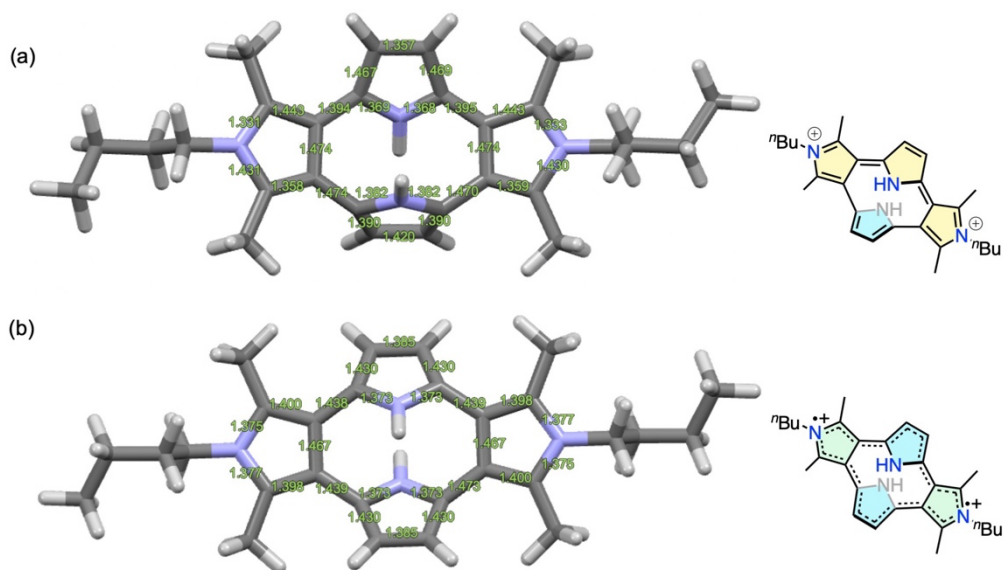

**Fig. S18** Selected bond lengths (in Å) of the optimized structures of **3<sup>2+</sup>**. (a) Closed-shell singlet with (R)B3LYP/6-311G(d,p) level and (b) open-shell triplet with (U)B3LYP/6-311G(d,p) level.

**Table S1.** Comparison of the total energy (sum of electronic and zero-point energies) of  $3^{2+}$  with various functional. The basis set was set at 6-311G(d,p) level.

| Relative energy | (R/U)B3LYP     | (R/U) $\omega$ B97XD | (R/U)CAM-B3LYP |
|-----------------|----------------|----------------------|----------------|
| CS, singlet     | +0.50 kcal/mol | +0.33 kcal/mol       | +0.31 kcal/mol |
| OS, singlet     | +1.64 kcal/mol | +1.64 kcal/mol       | +1.73 kcal/mol |
| OS, triplet     | 0 kcal/mol     | 0 kcal/mol           | 0 kcal/mol     |

**Table S2.** Comparison of the total energy (sum of electronic and zero-point energies) of  $3^{2+}$  with various functional with SMD continuum solvation model ( $\text{CH}_2\text{Cl}_2$ ). The basis set was set at 6-311G(d,p) level.

| Relative energy | (R/U)B3LYP     | (R/U) $\omega$ B97XD | (R/U)CAM-B3LYP |
|-----------------|----------------|----------------------|----------------|
| CS, singlet     | +1.14 kcal/mol | 0 kcal/mol           | +0.46 kcal/mol |
| OS, singlet     | +1.39 kcal/mol | +1.32 kcal/mol       | +1.30 kcal/mol |
| OS, triplet     | 0 kcal/mol     | +0.12 kcal/mol       | 0 kcal/mol     |

## 8-2 TD-DFT Calculations

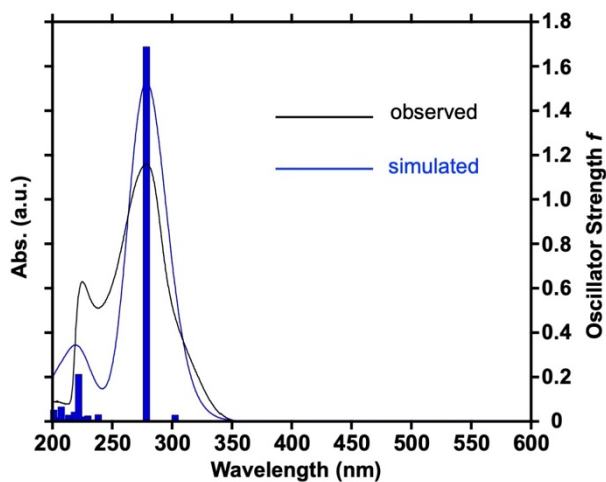

**Fig. S19** Calculated UV/Vis absorption spectra of **3** at (R)B3LYP/6-311G(d,p) level. SMD solvation model (CH<sub>2</sub>Cl<sub>2</sub>) was applied.

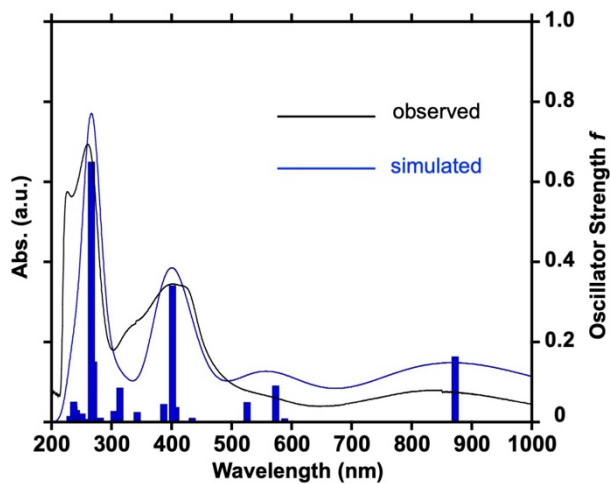

**Fig. S20** Calculated UV/Vis absorption spectra of **3<sup>+</sup>** at (U)B3LYP/6-311G(d,p) level. SMD solvation model (CH<sub>2</sub>Cl<sub>2</sub>) was applied.



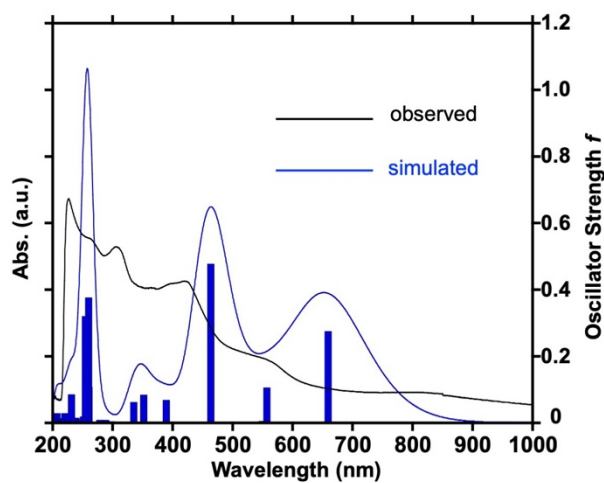

**Fig. S21** Calculated UV/Vis absorption spectra of  $3^{2+}$  (closed-shell) at (R)B3LYP/6-311G(d,p) level. SMD solvation model ( $\text{CH}_2\text{Cl}_2$ ) was applied.

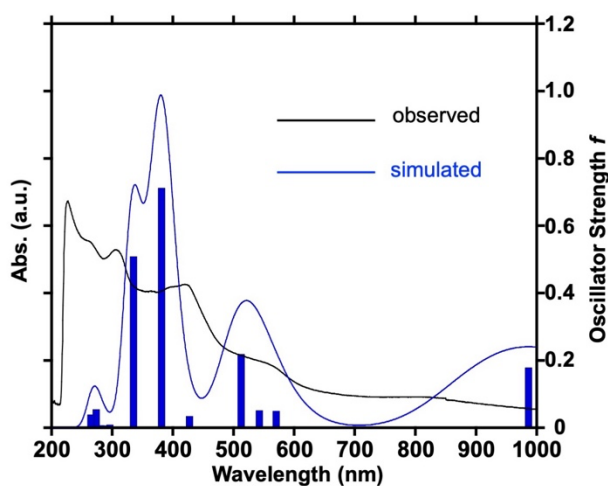

**Fig. S22** Calculated UV/Vis absorption spectra of  $3^{2+}$  (open-shell, triplet) at (U)B3LYP/6-311G(d,p) level. SMD solvation model ( $\text{CH}_2\text{Cl}_2$ ) was applied.

### 8-3 ACID Isosurface

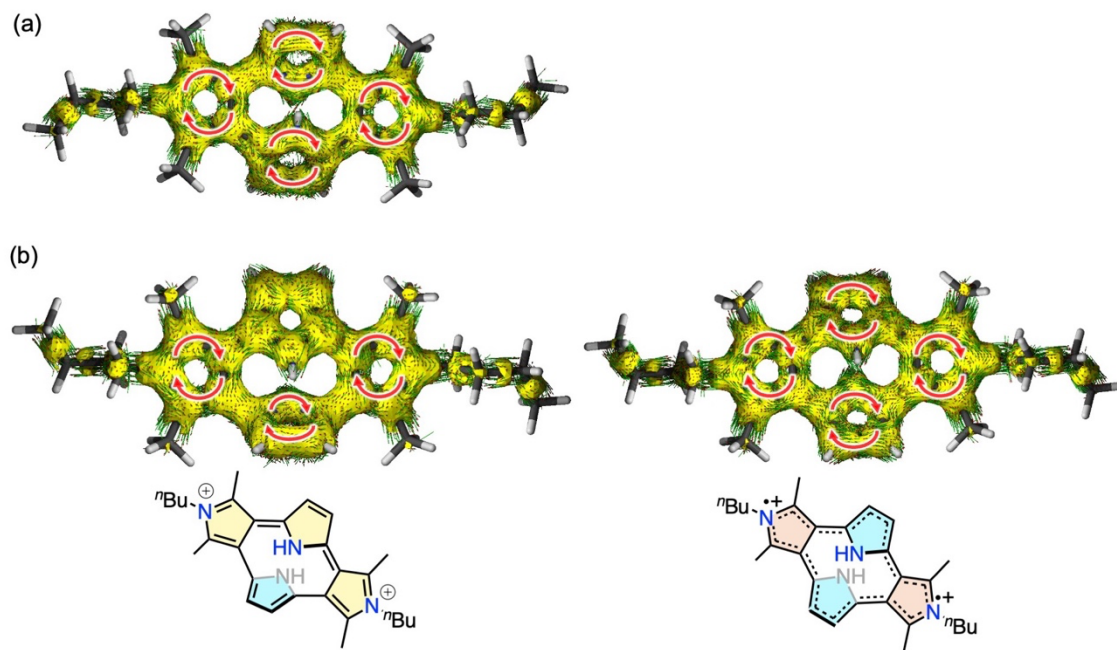

**Fig. S23** ACID isosurfaces for (a) **3** and (b) **3<sup>2+</sup>** (left: closed-shell, right: open-shell triplet). Isosurface value: 0.05.

## 8-4 NICS Calculations

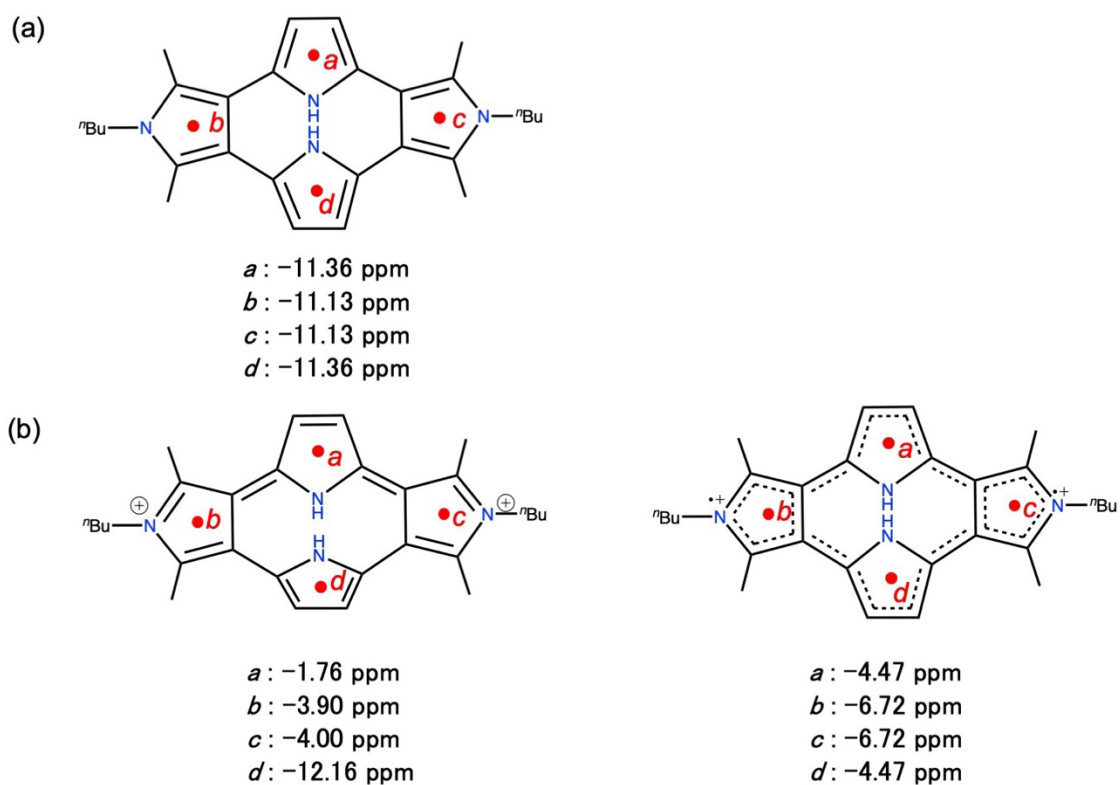

**Fig. S24** NICS(0) values for (a) **3** and (b) **3<sup>2+</sup>** (left: closed-shell, right: open-shell triplet).

## 9. Chemical Oxidation

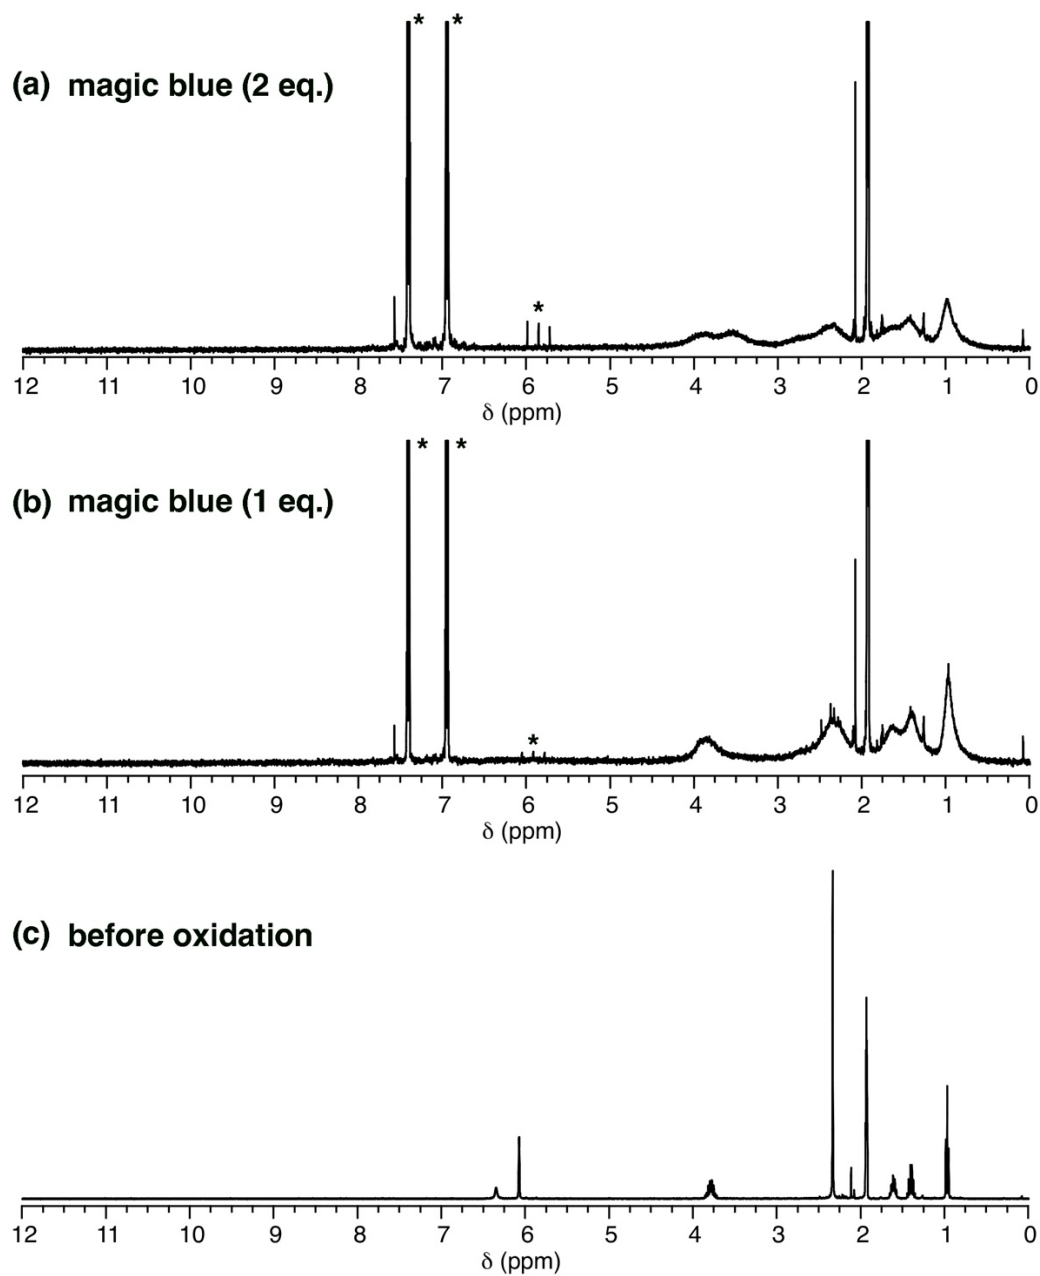

**Fig. S25** <sup>1</sup>H NMR spectra of cyclo[4]pyrrole **3** with (a) 2, (b) 1, and (c) 0 equivalent(s) of magic blue recorded in CD<sub>3</sub>CN (400 MHz at 25 °C). Asterisks (\*) indicate impurities derived from magic blue.

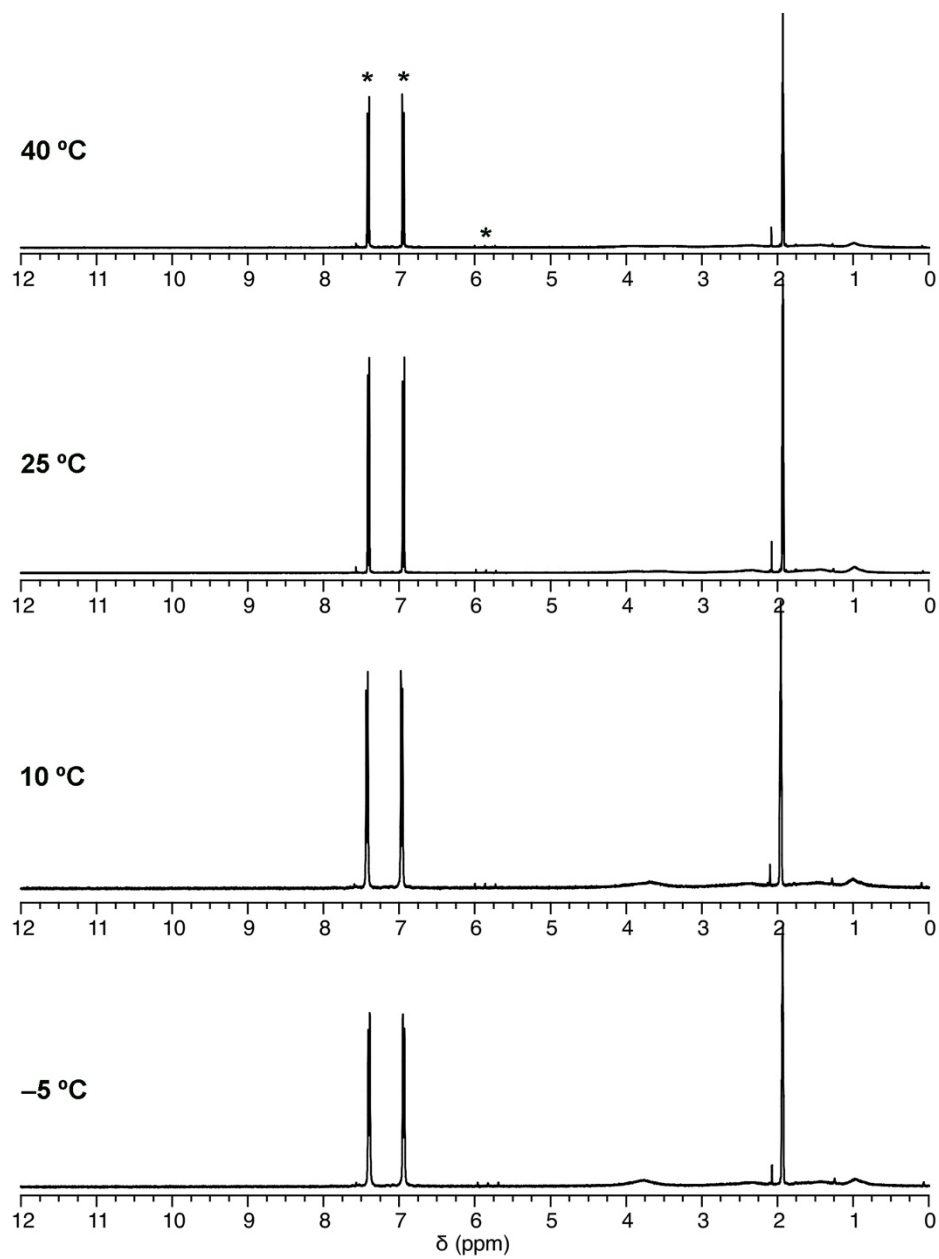

**Fig. S26** Variable temperature 400 MHz <sup>1</sup>H NMR spectra of cyclo[4]pyrrole **3** after addition of 2 equivalent of magic blue in CD<sub>3</sub>CN. Asterisks (\*) indicate impurities derived from magic blue.

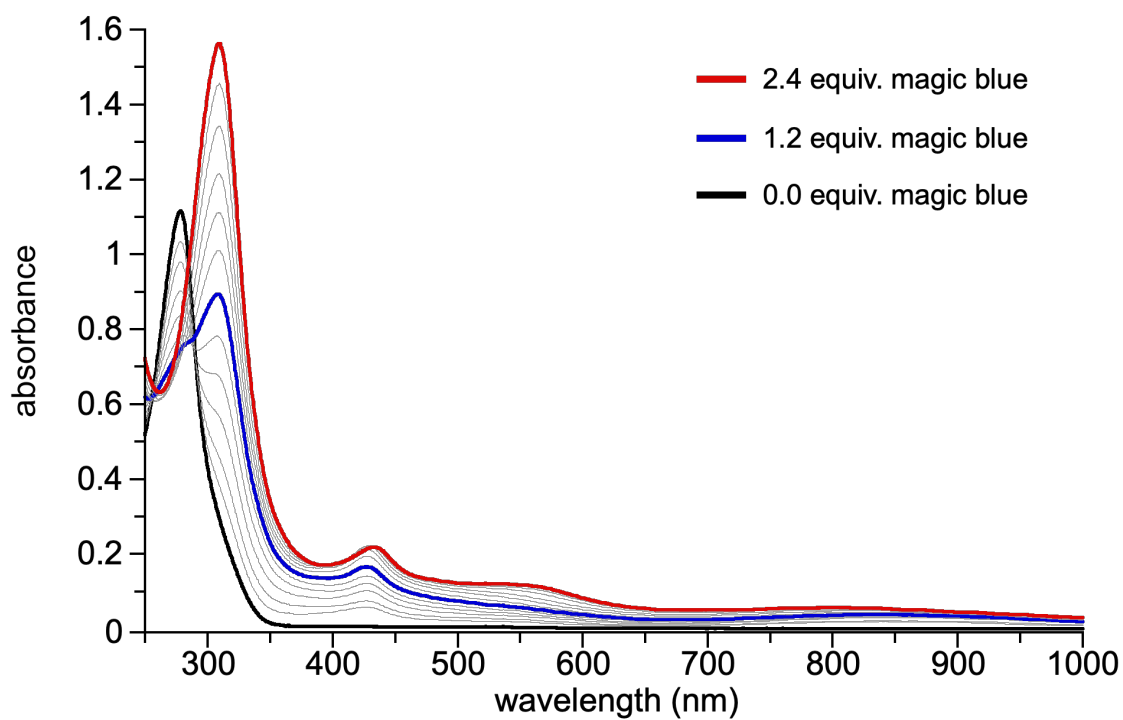

**Fig. S27** UV-vis absorption spectra of cyclo[4]pyrrole **3** during titration with magic blue (0 to 2.4 equiv.) in  $\text{CH}_2\text{Cl}_2$ . The absorption band at 309 nm is attributed to tris(4-bromophenyl)amine which was generated upon oxidation with magic blue.

## 10. NMR Spectra

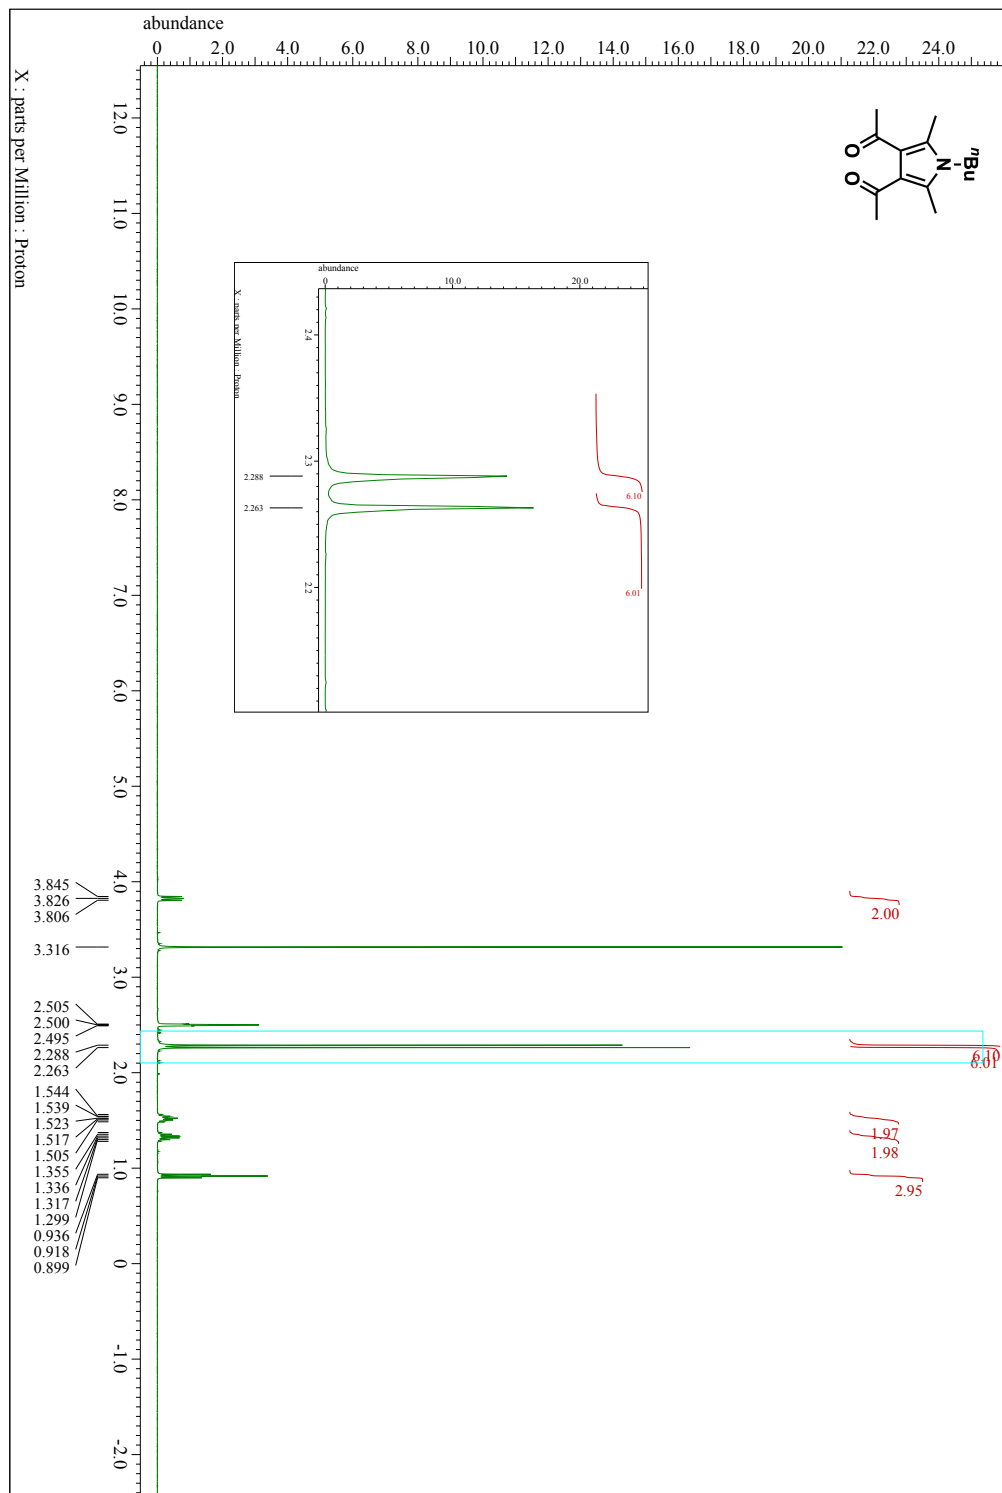

**Fig. S28**  $^1\text{H}$  NMR spectrum of compound **6** (400 MHz,  $\text{DMSO-}d_6$ , 298 K).

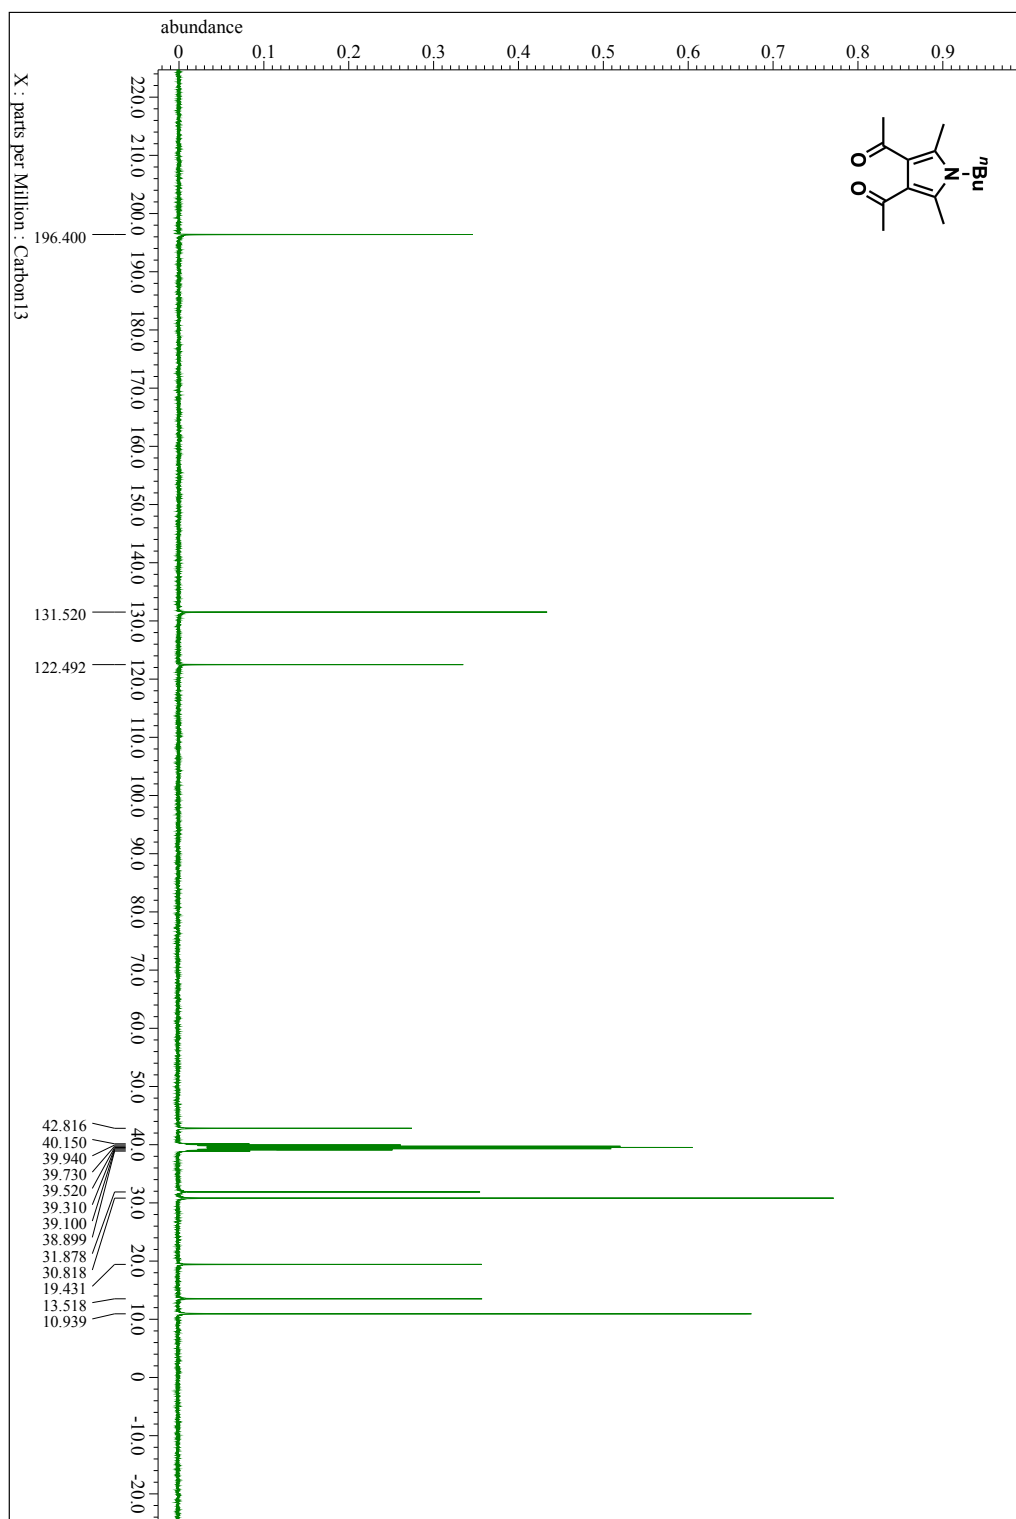

**Fig. S29**  $^{13}\text{C}\{^1\text{H}\}$  NMR spectrum of compound **6** (100 MHz,  $\text{DMSO-}d_6$ , 298 K).



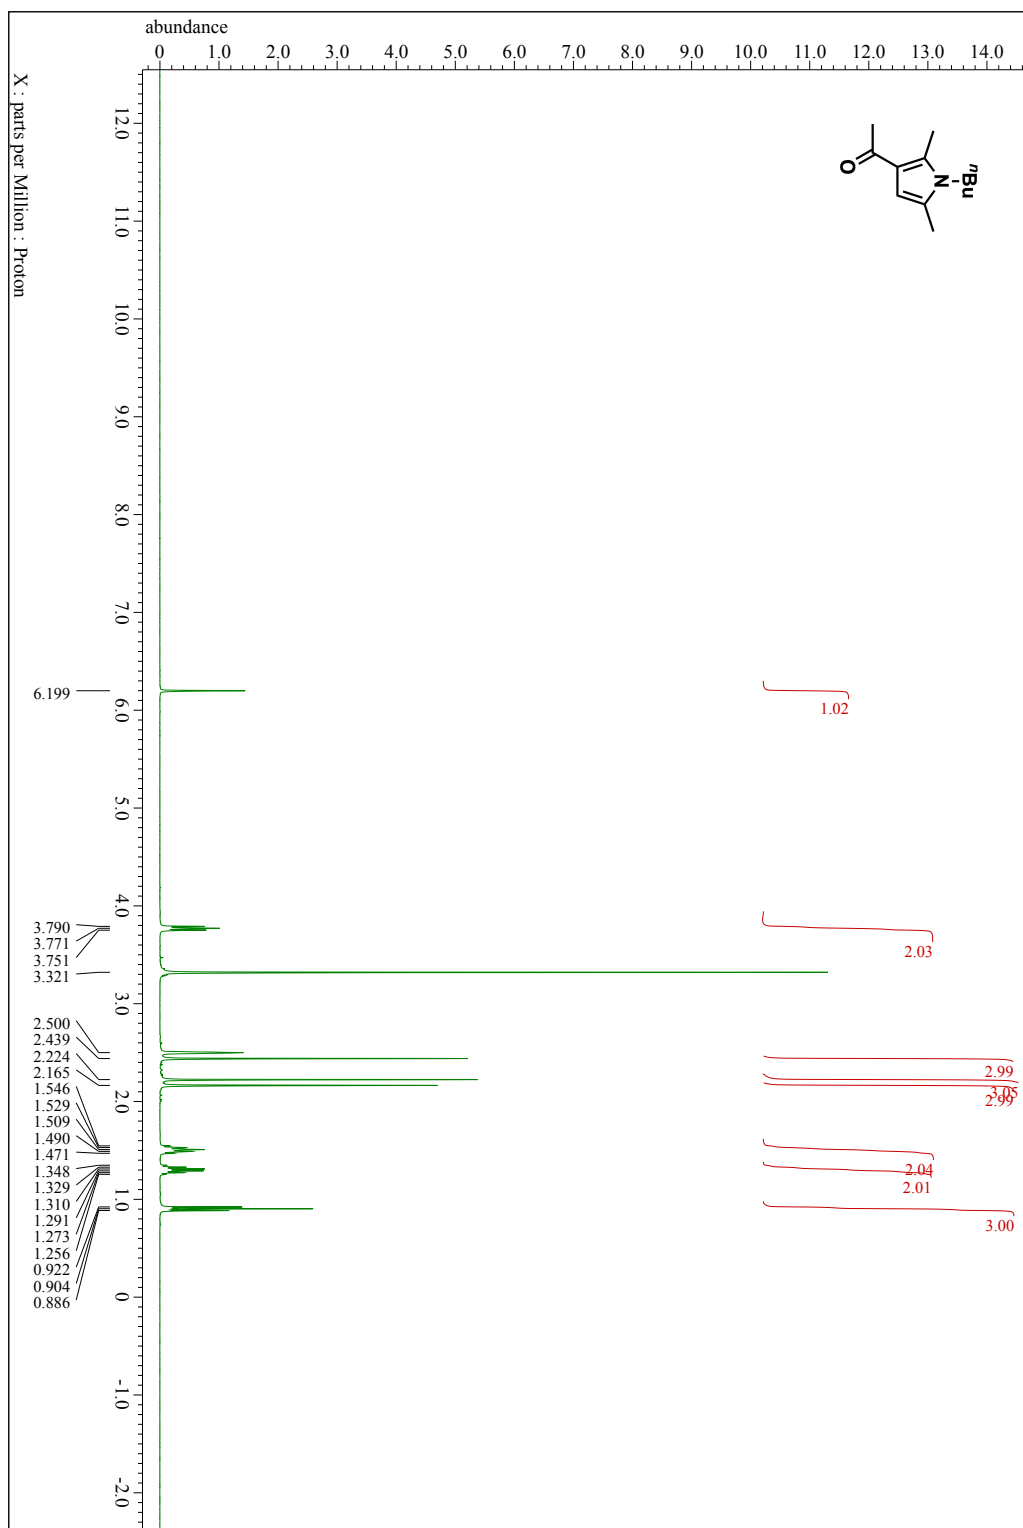

**Fig. S30** <sup>1</sup>H NMR spectrum of compound **7** (400 MHz, DMSO-*d*<sub>6</sub>, 298 K).

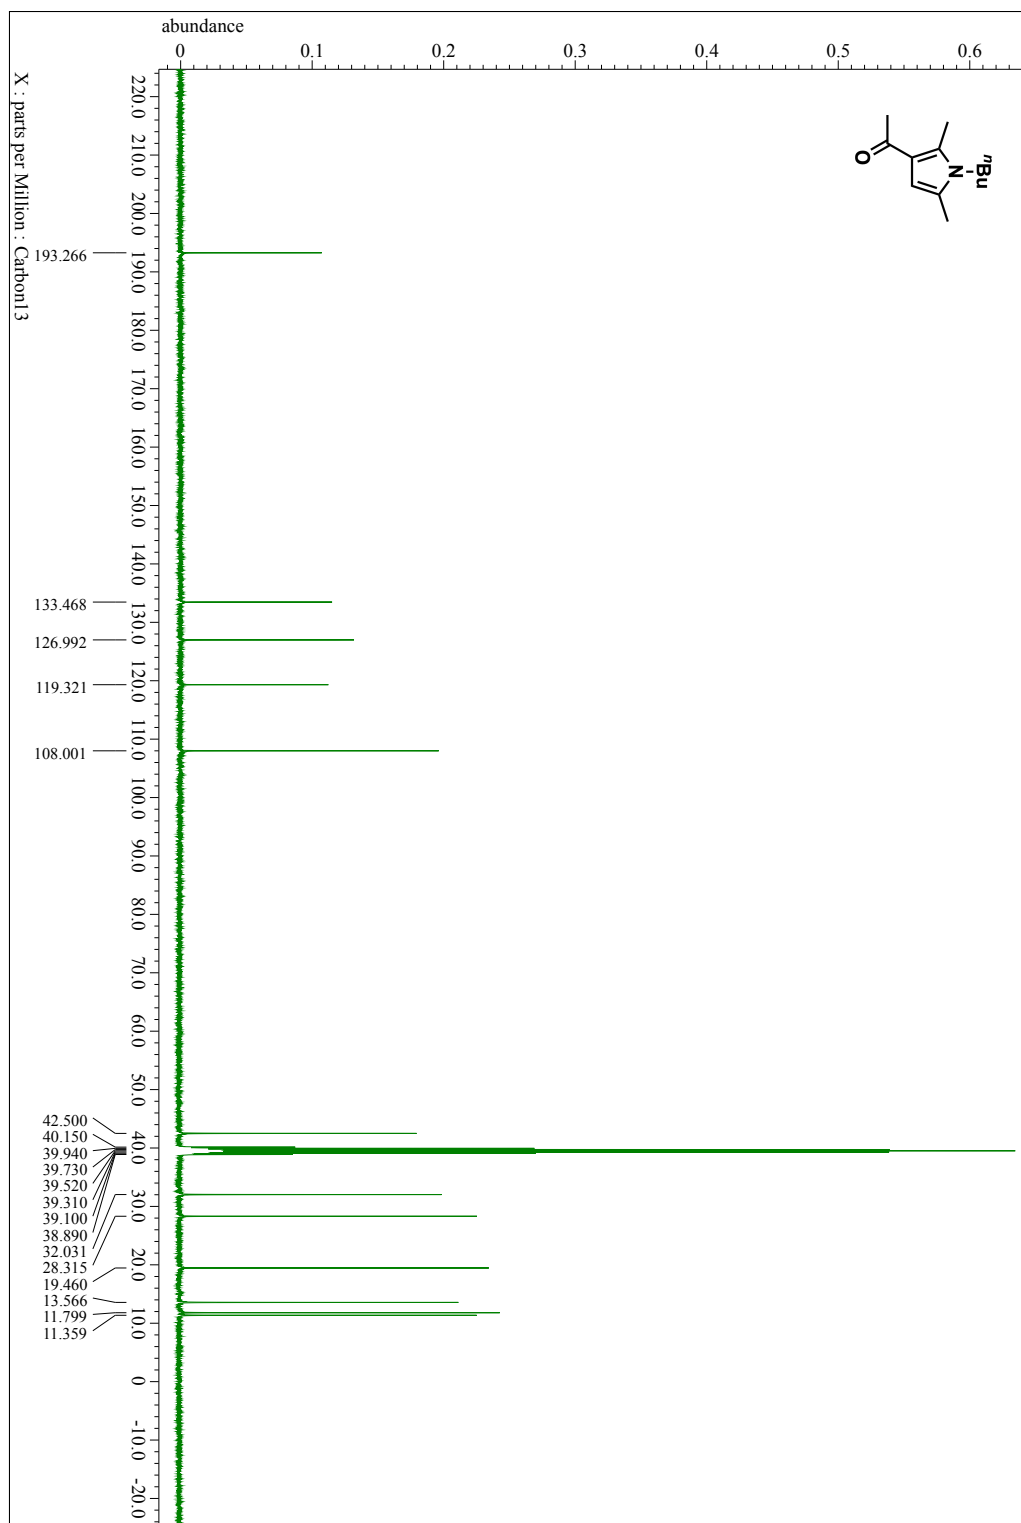

**Fig. S31**  $^{13}\text{C}\{^1\text{H}\}$  NMR spectrum of compound 7 (100 MHz,  $\text{DMSO-}d_6$ , 298 K).

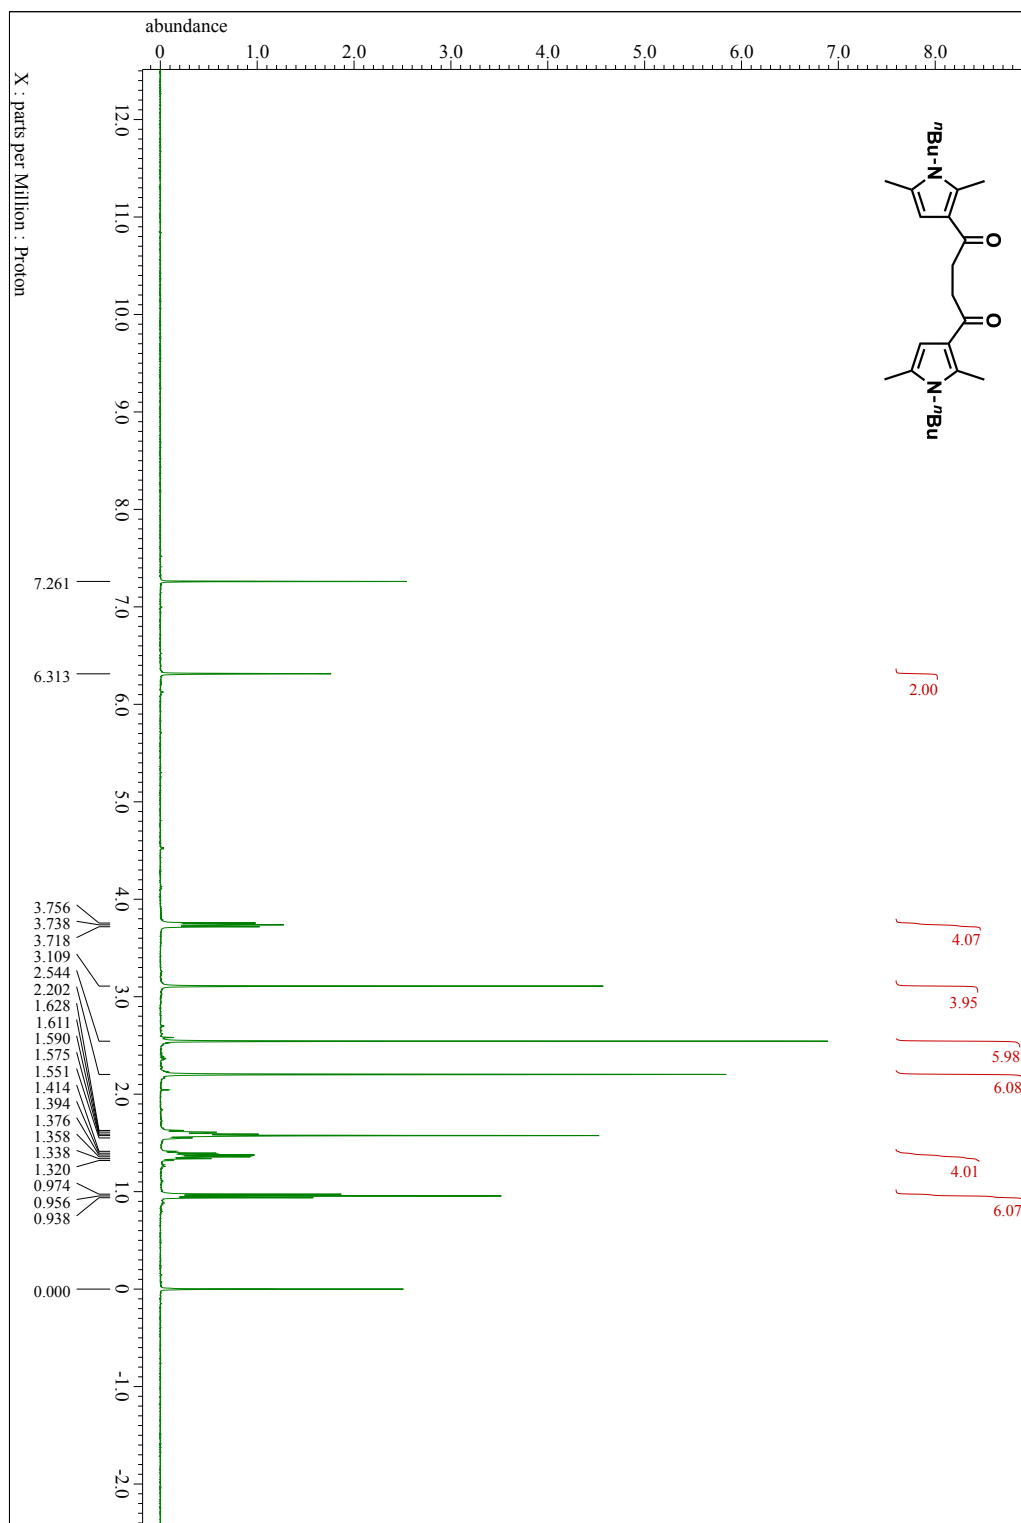

**Fig. S32** <sup>1</sup>H NMR spectrum of compound **8** (400 MHz, CDCl<sub>3</sub>, 298 K).

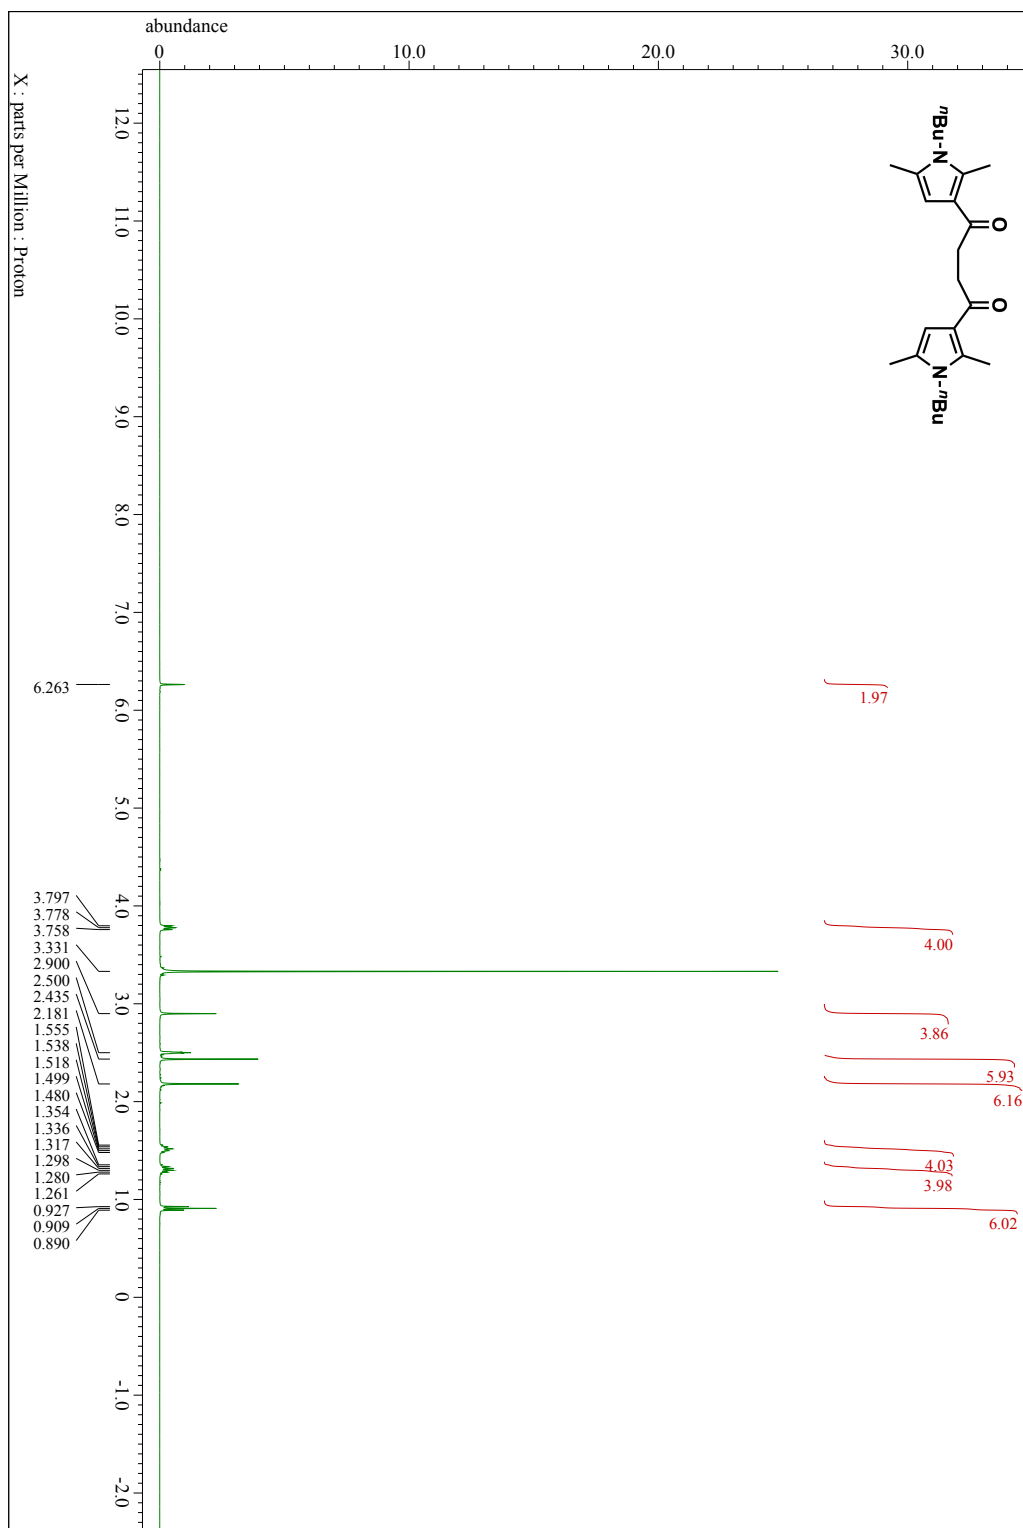

**Fig. S33**  $^1\text{H}$  NMR spectrum of compound **8** (400 MHz,  $\text{DMSO}-d_6$ , 298 K).

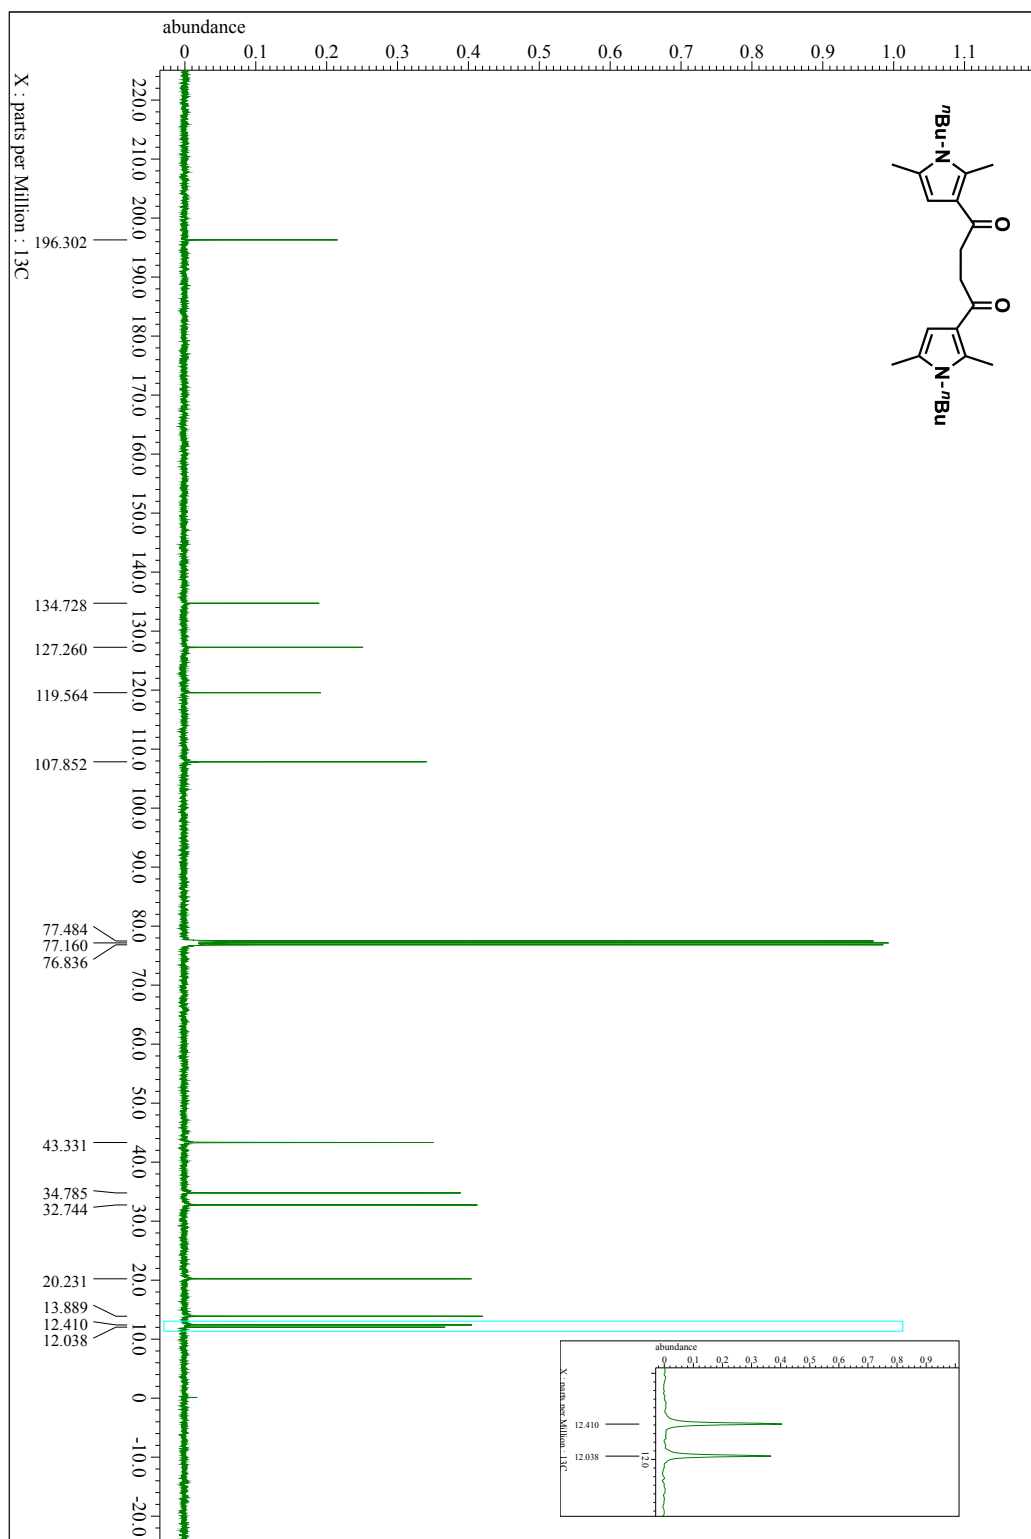

**Fig. S34**  $^{13}\text{C}\{^1\text{H}\}$  NMR spectrum of compound **8** (100 MHz,  $\text{CDCl}_3$ , 298 K).

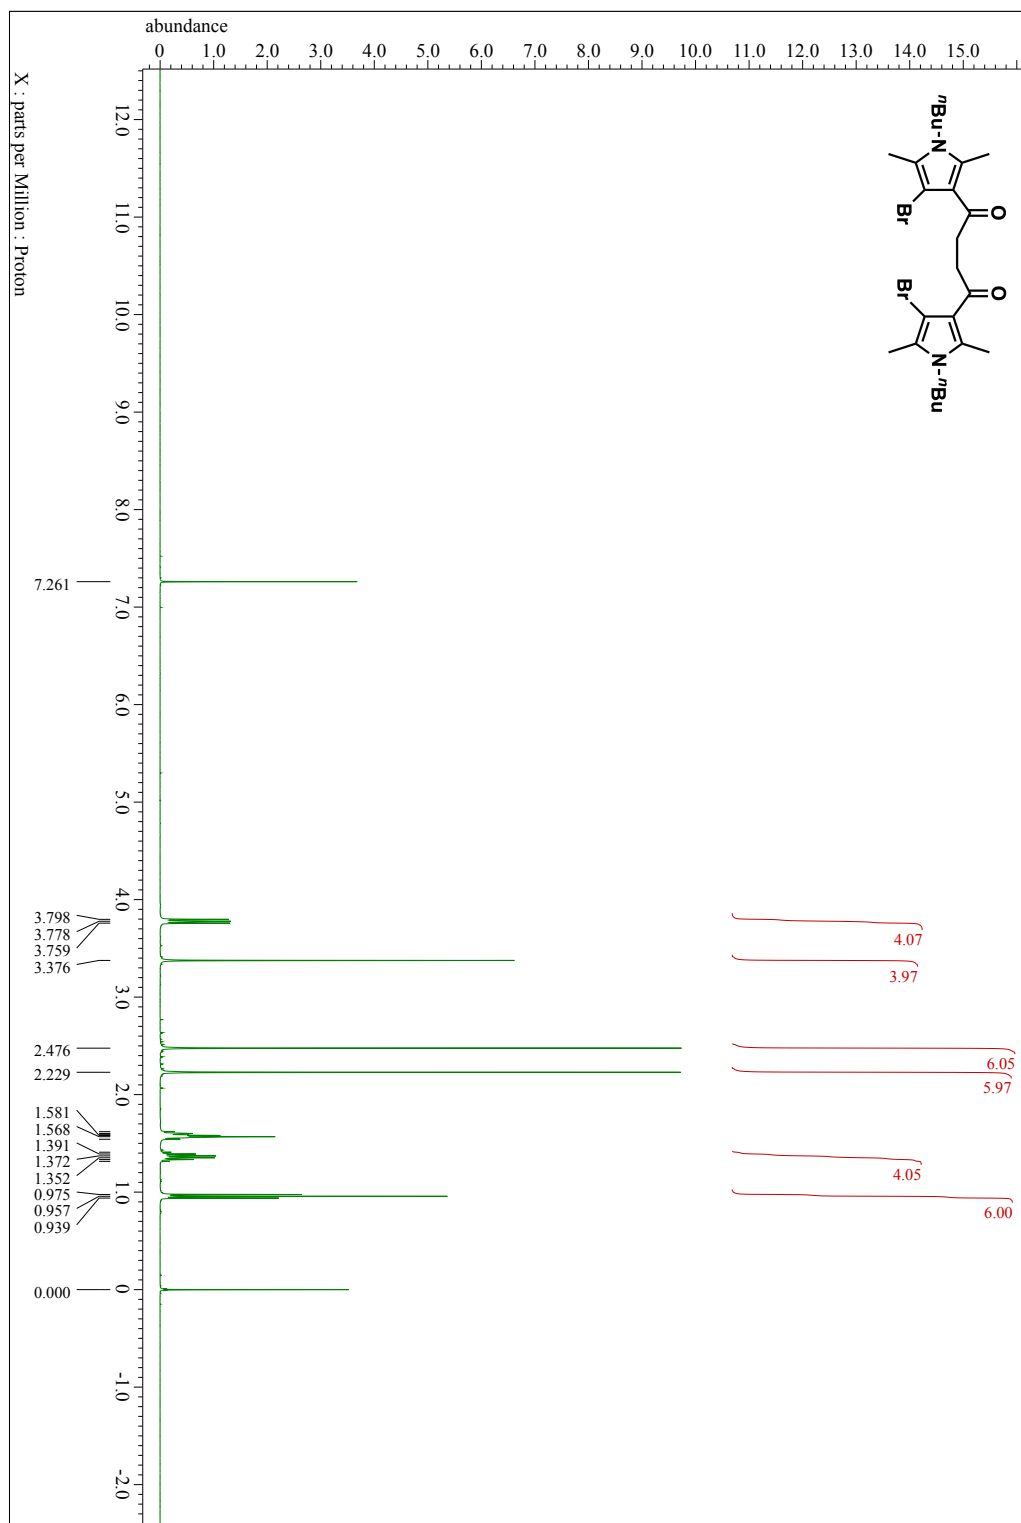

**Fig. S35**  $^1\text{H}$  NMR spectrum of compound **9** (400 MHz,  $\text{CDCl}_3$ , 298 K).

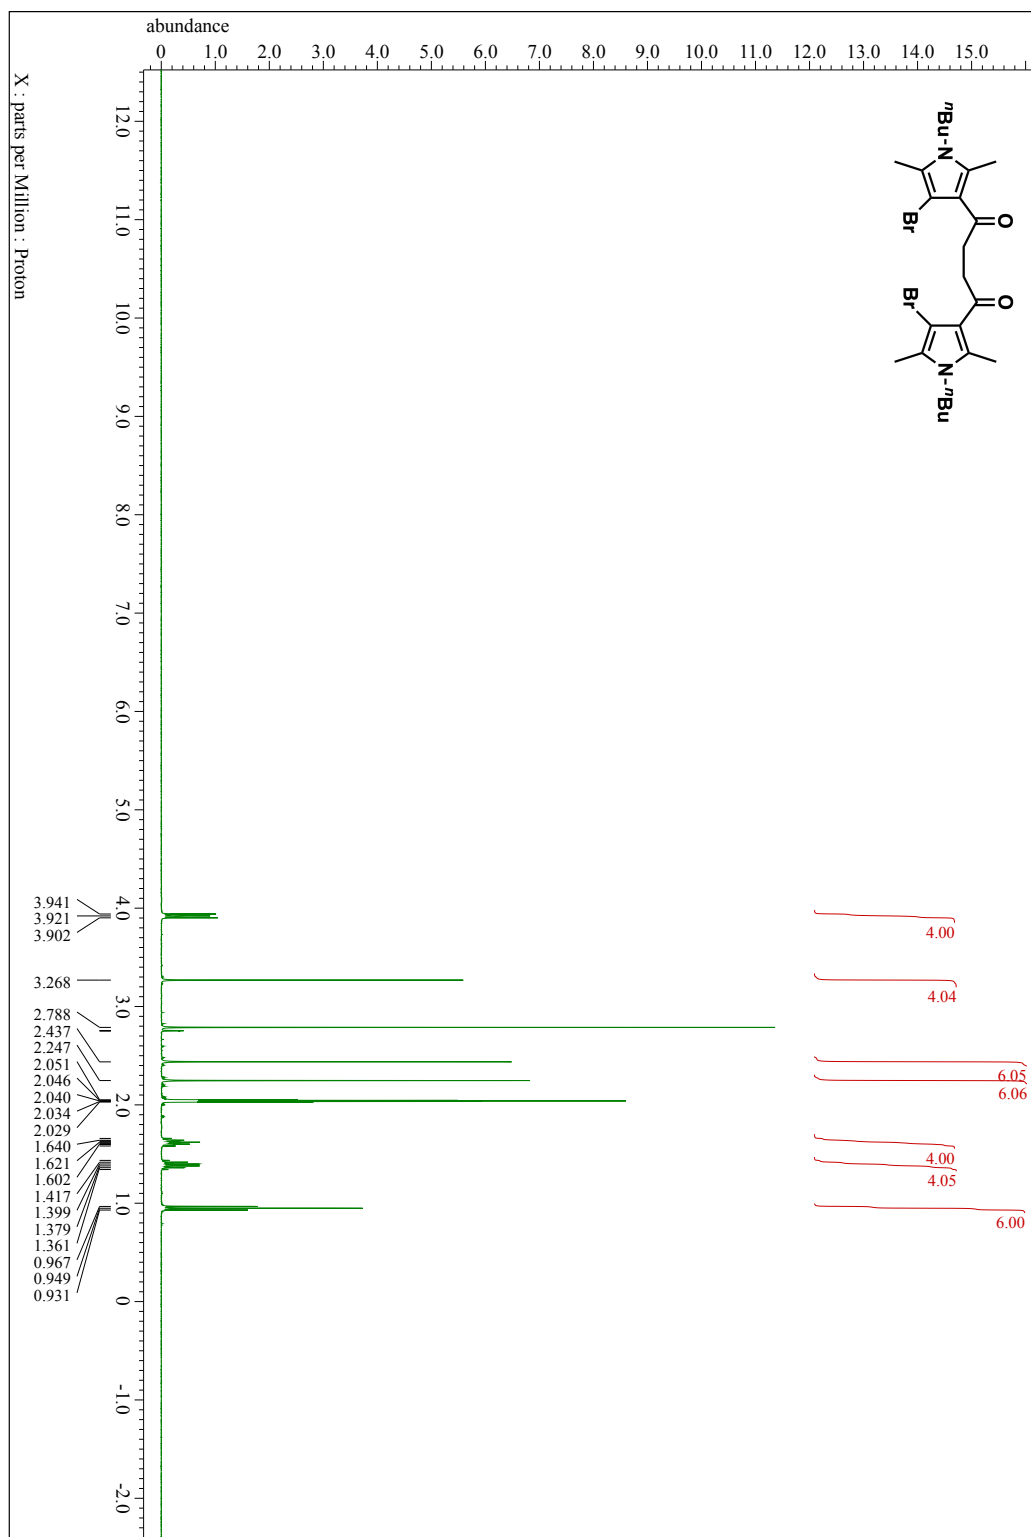

**Fig. S36** <sup>1</sup>H NMR spectrum of compound **9** (400 MHz, acetone-*d*<sub>6</sub>, 298 K).

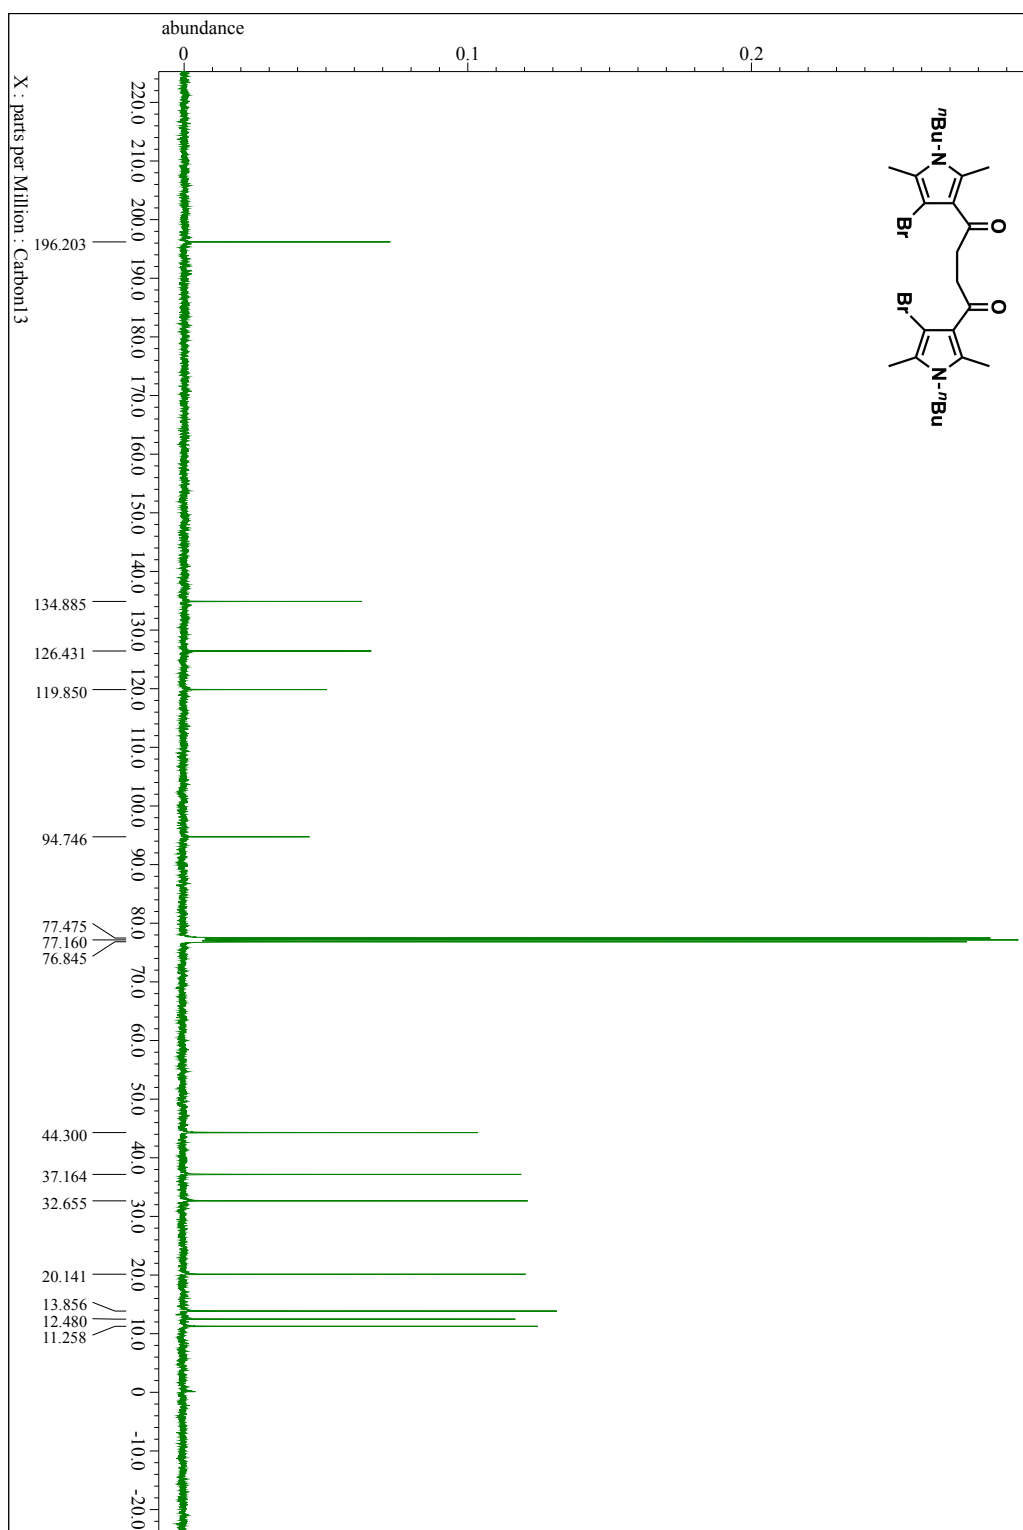

**Fig. S37**  $^{13}\text{C}\{^1\text{H}\}$  NMR spectrum of compound **9** (100 MHz,  $\text{CDCl}_3$ , 298 K).



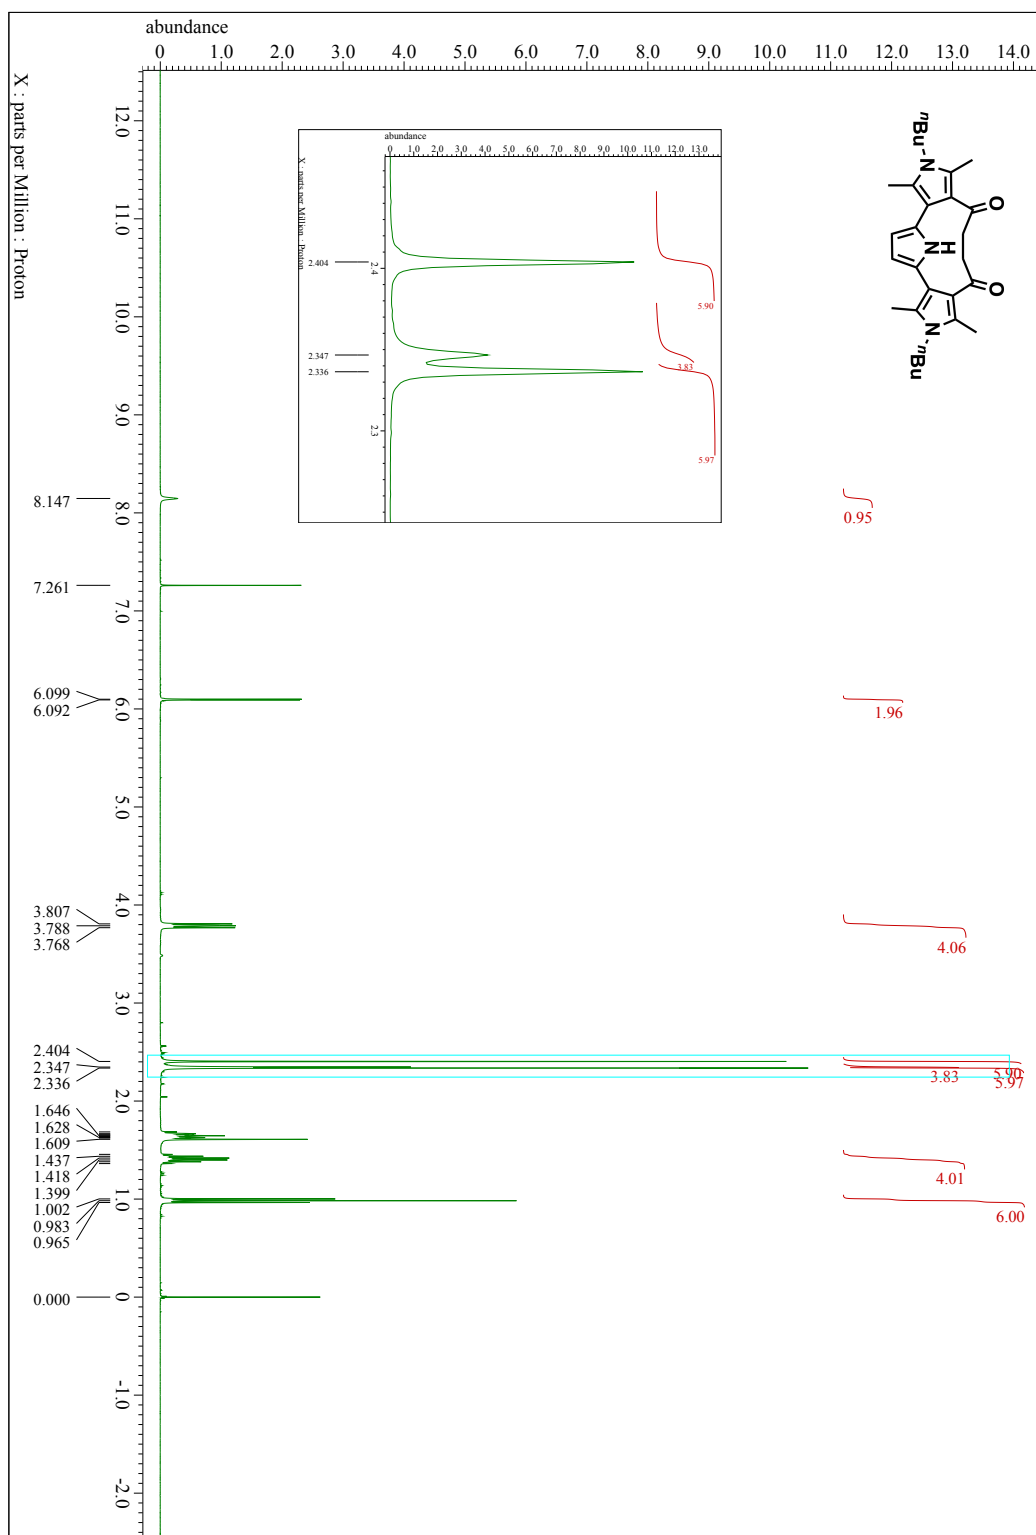

**Fig. S38**  $^1\text{H NMR}$  spectrum of compound **10** (400 MHz,  $\text{CDCl}_3$ , 298 K).

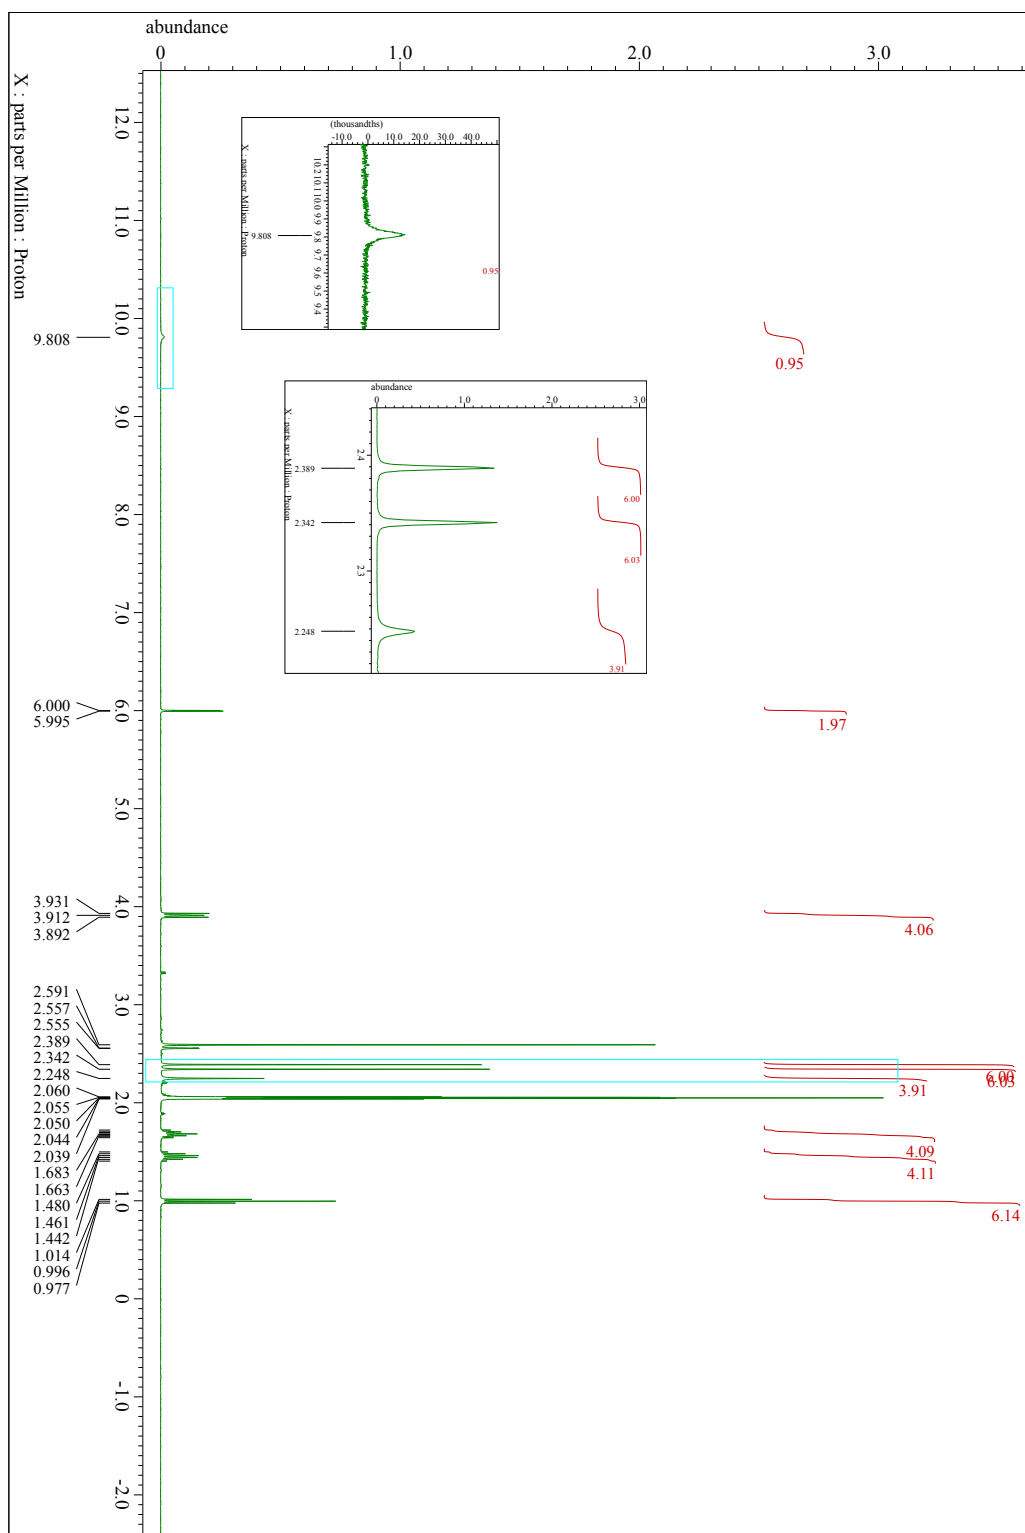

Fig. S39  $^1\text{H}$  NMR spectrum of compound **10** (400 MHz,  $\text{acetone-}d_6$ , 328 K).

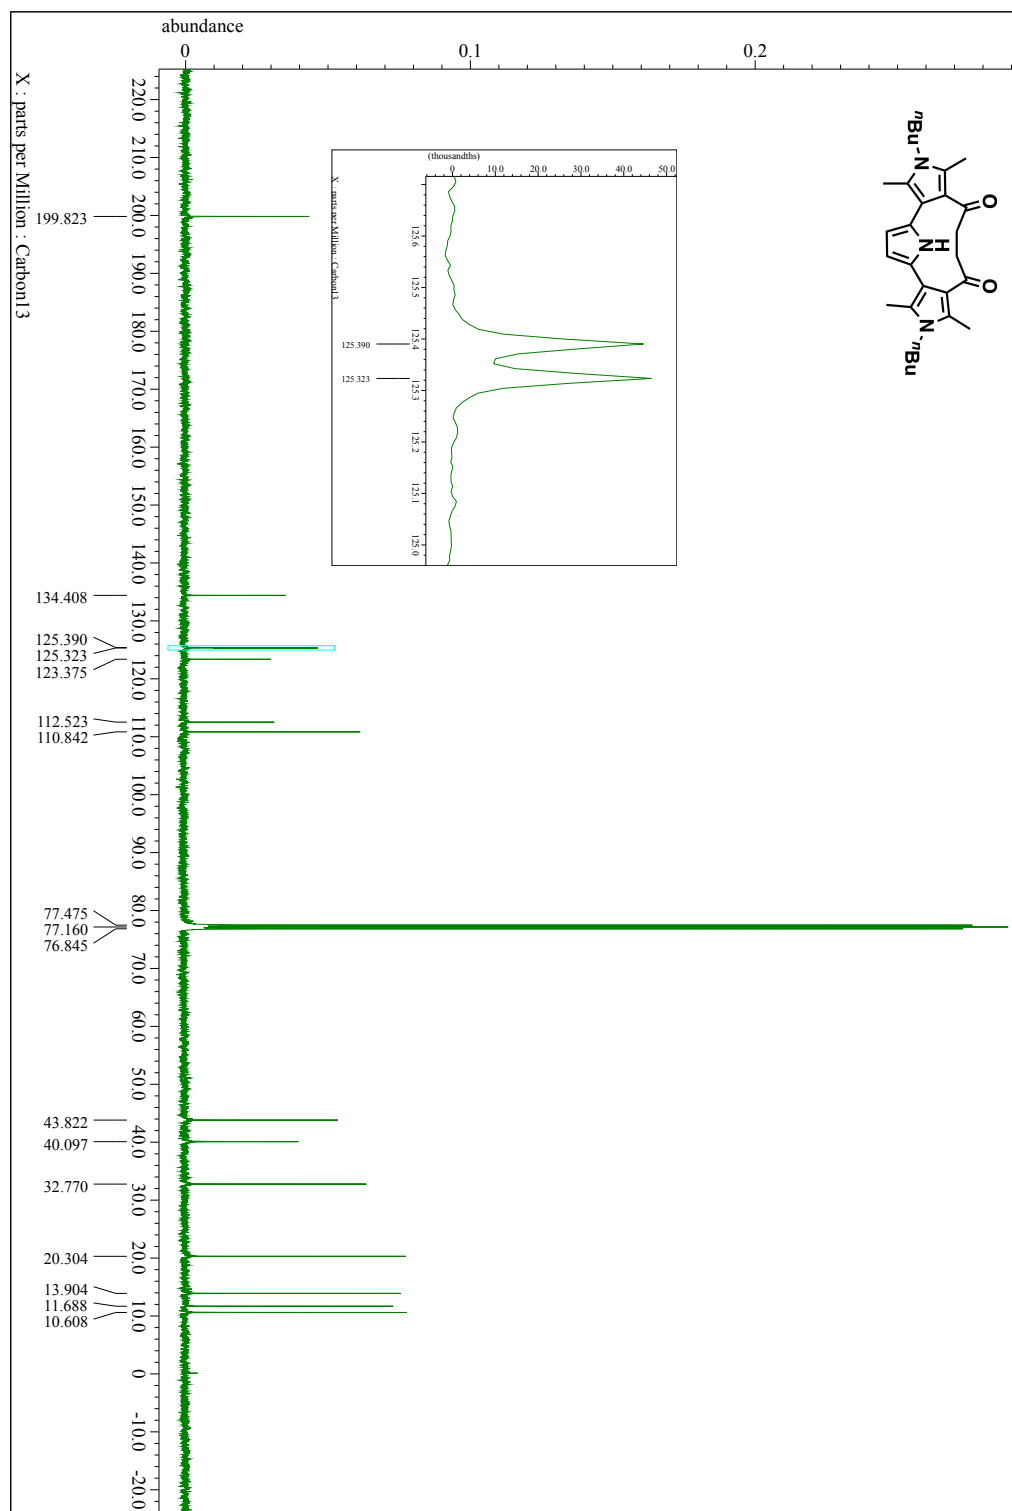

**Fig. S40**  $^{13}\text{C}\{^1\text{H}\}$  NMR spectrum of compound **10** (100 MHz,  $\text{CDCl}_3$ , 298 K).

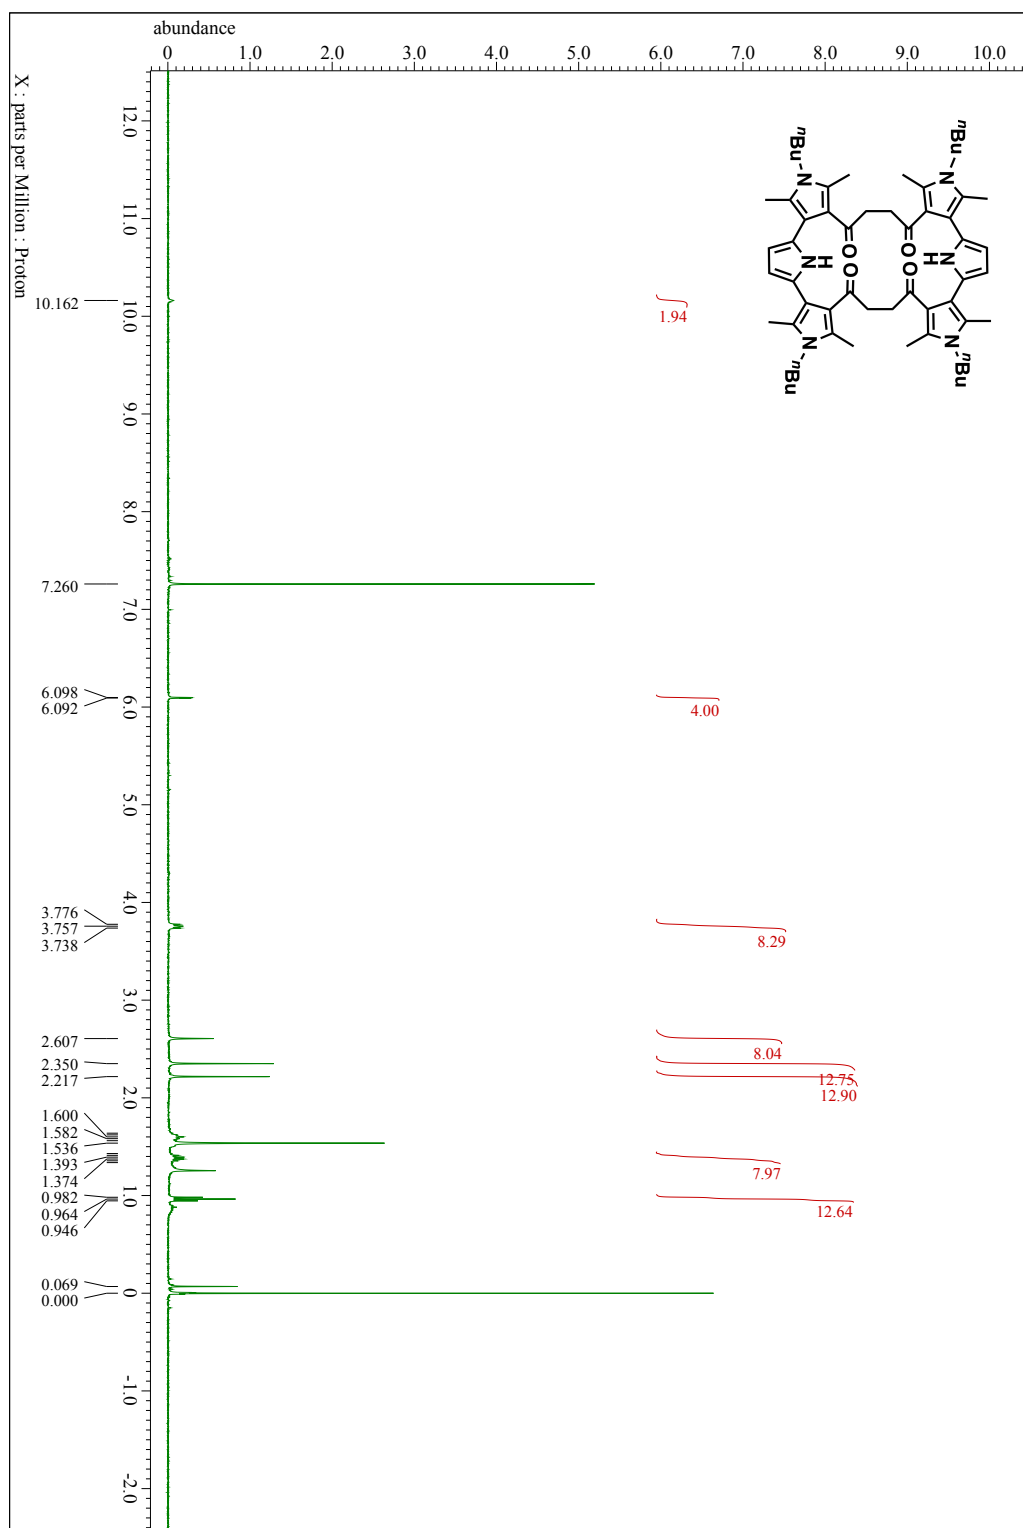

**Fig. S41**  $^1\text{H}$  NMR spectrum of compound **12** (400 MHz,  $\text{CDCl}_3$ , 298 K).

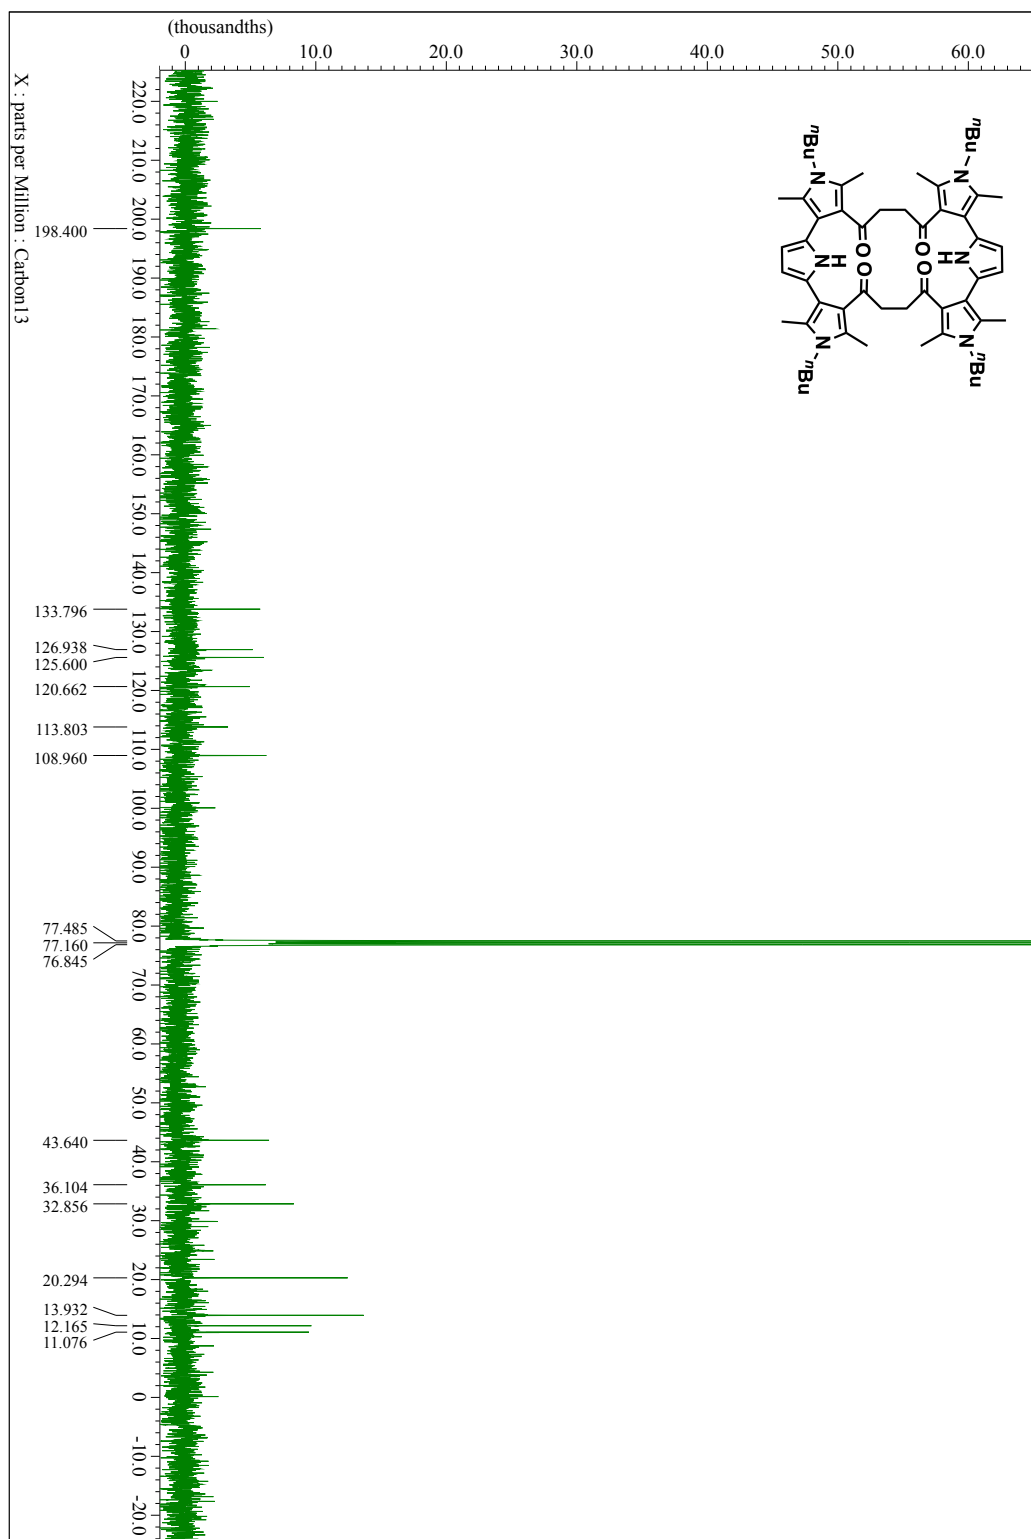

**Fig. S42**  $^{13}\text{C}\{^1\text{H}\}$  NMR spectrum of compound **12** (100 MHz,  $\text{CDCl}_3$ , 298 K).

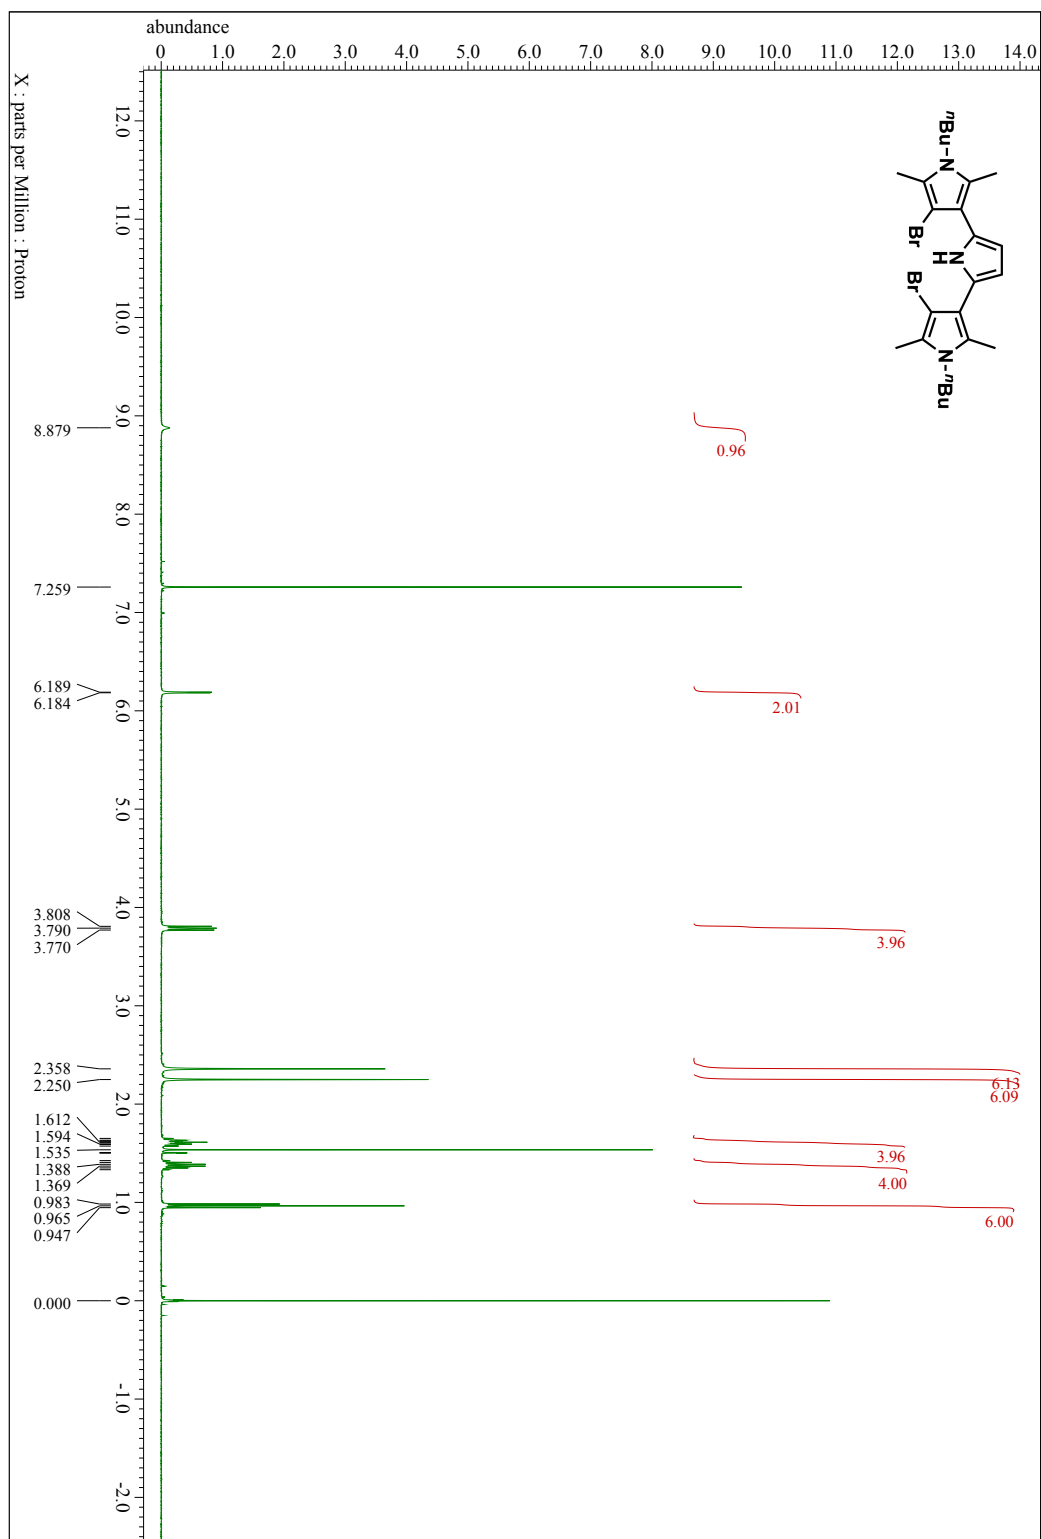

Fig. S43 <sup>1</sup>H NMR spectrum of compound 11 (400 MHz, CDCl<sub>3</sub>, 298 K).

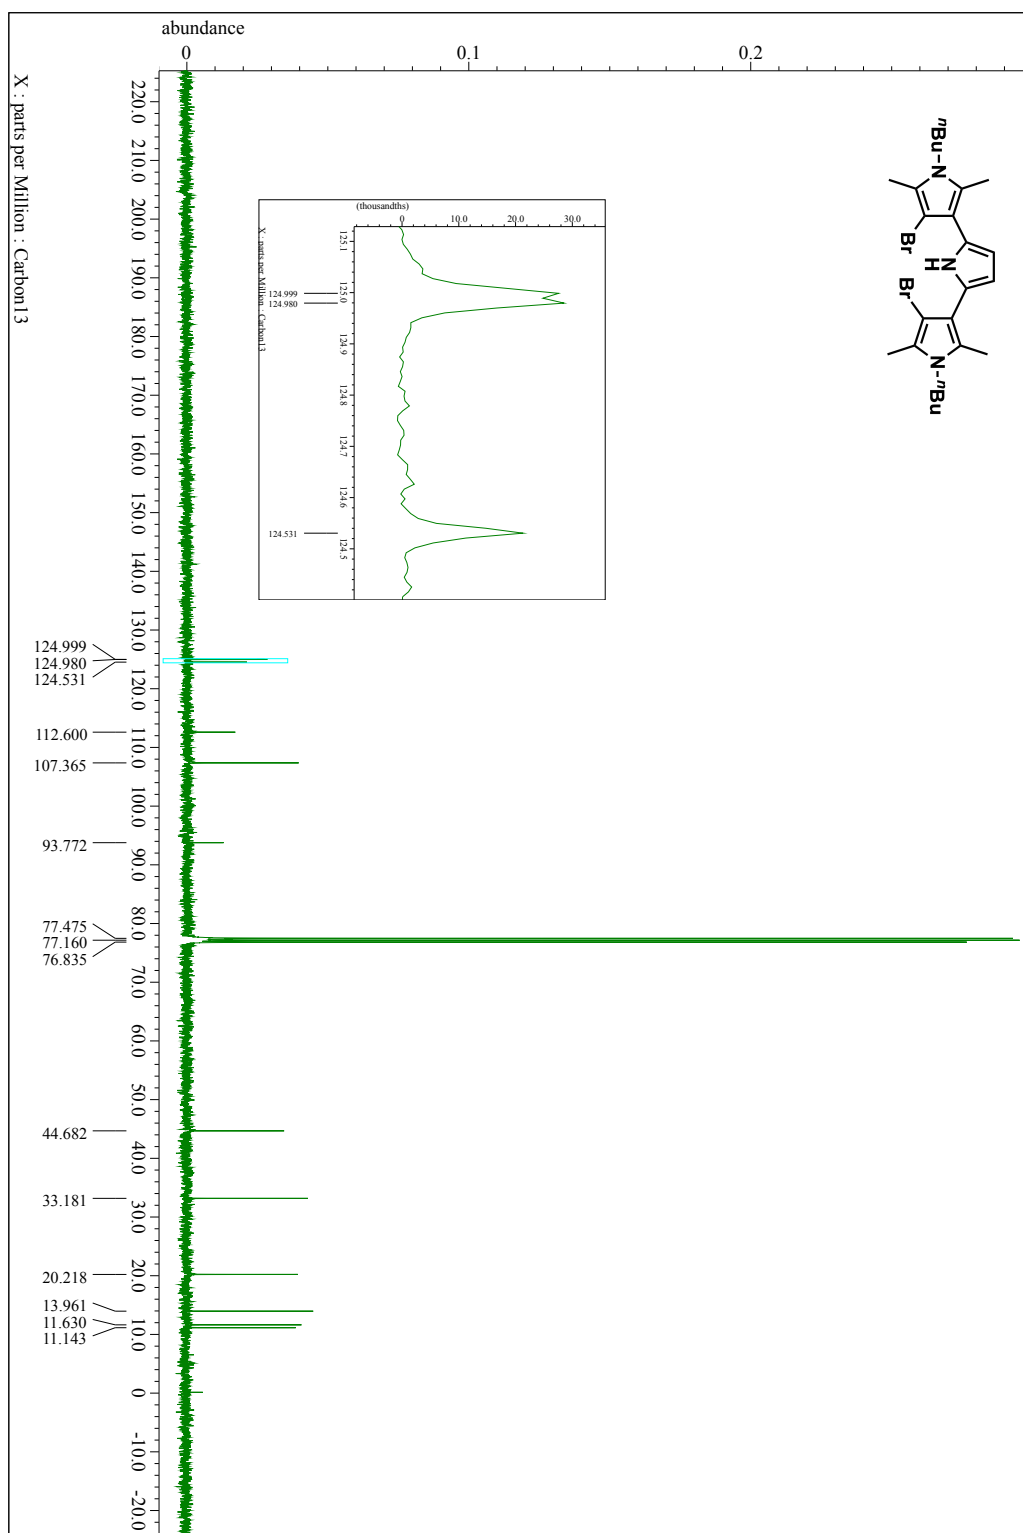

**Fig. S44**  $^{13}\text{C}\{^1\text{H}\}$  NMR spectrum of compound **11** (100 MHz,  $\text{CDCl}_3$ , 298 K).

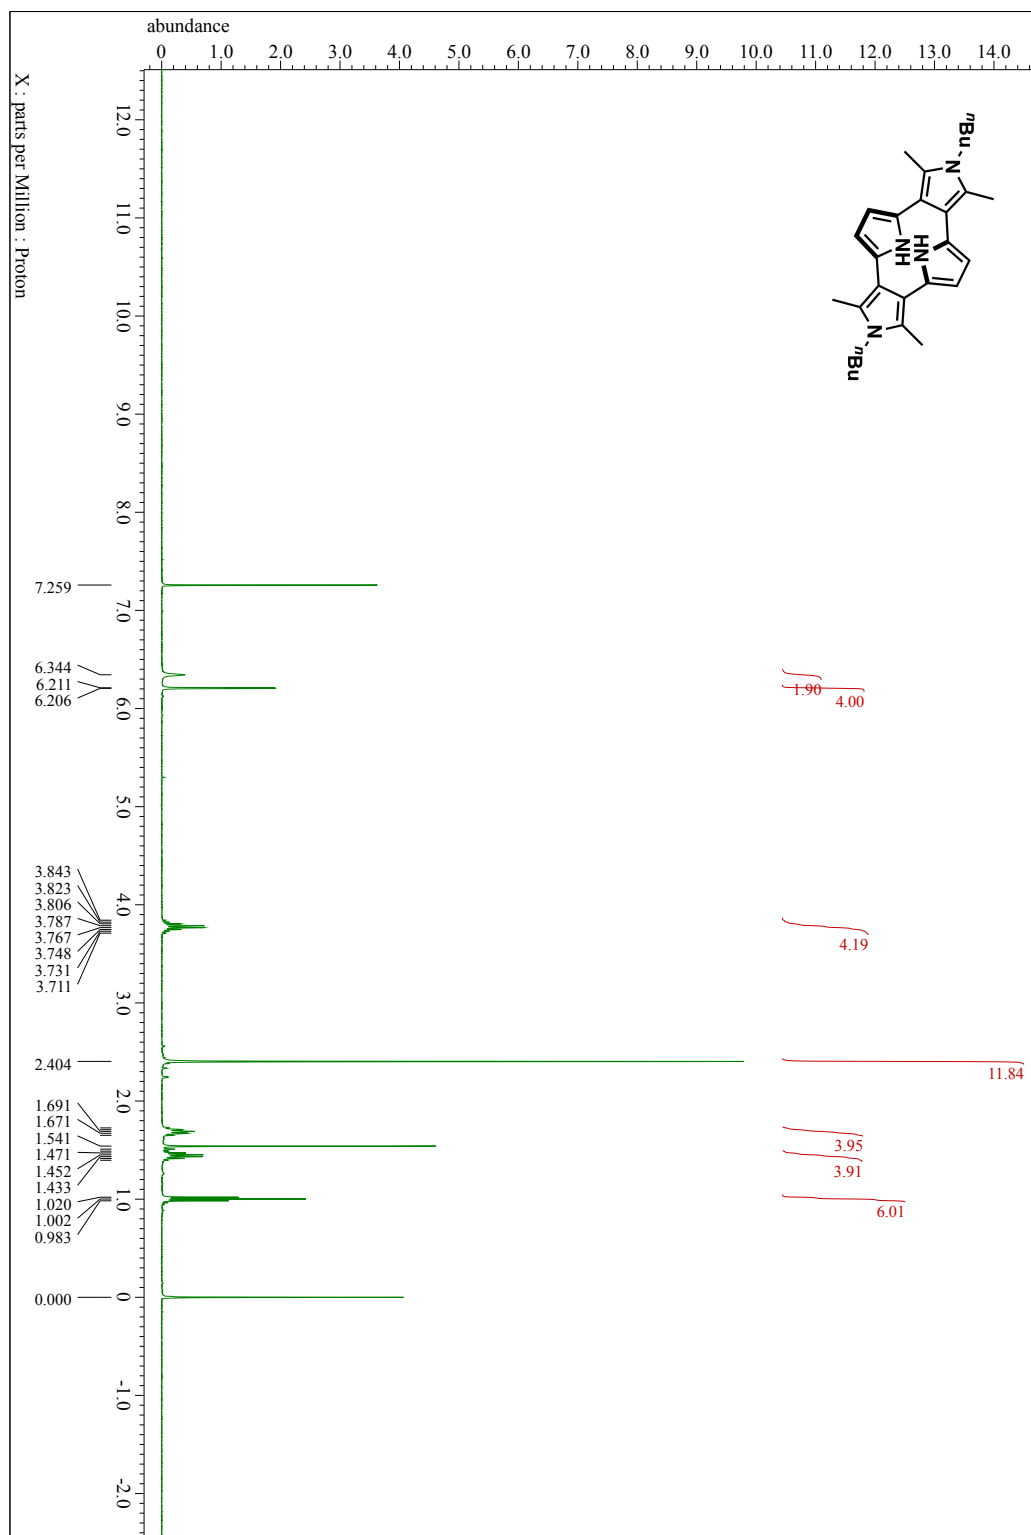

**Fig. S45**  $^1\text{H}$  NMR spectrum of compound **3** (400 MHz,  $\text{CDCl}_3$ , 298 K).



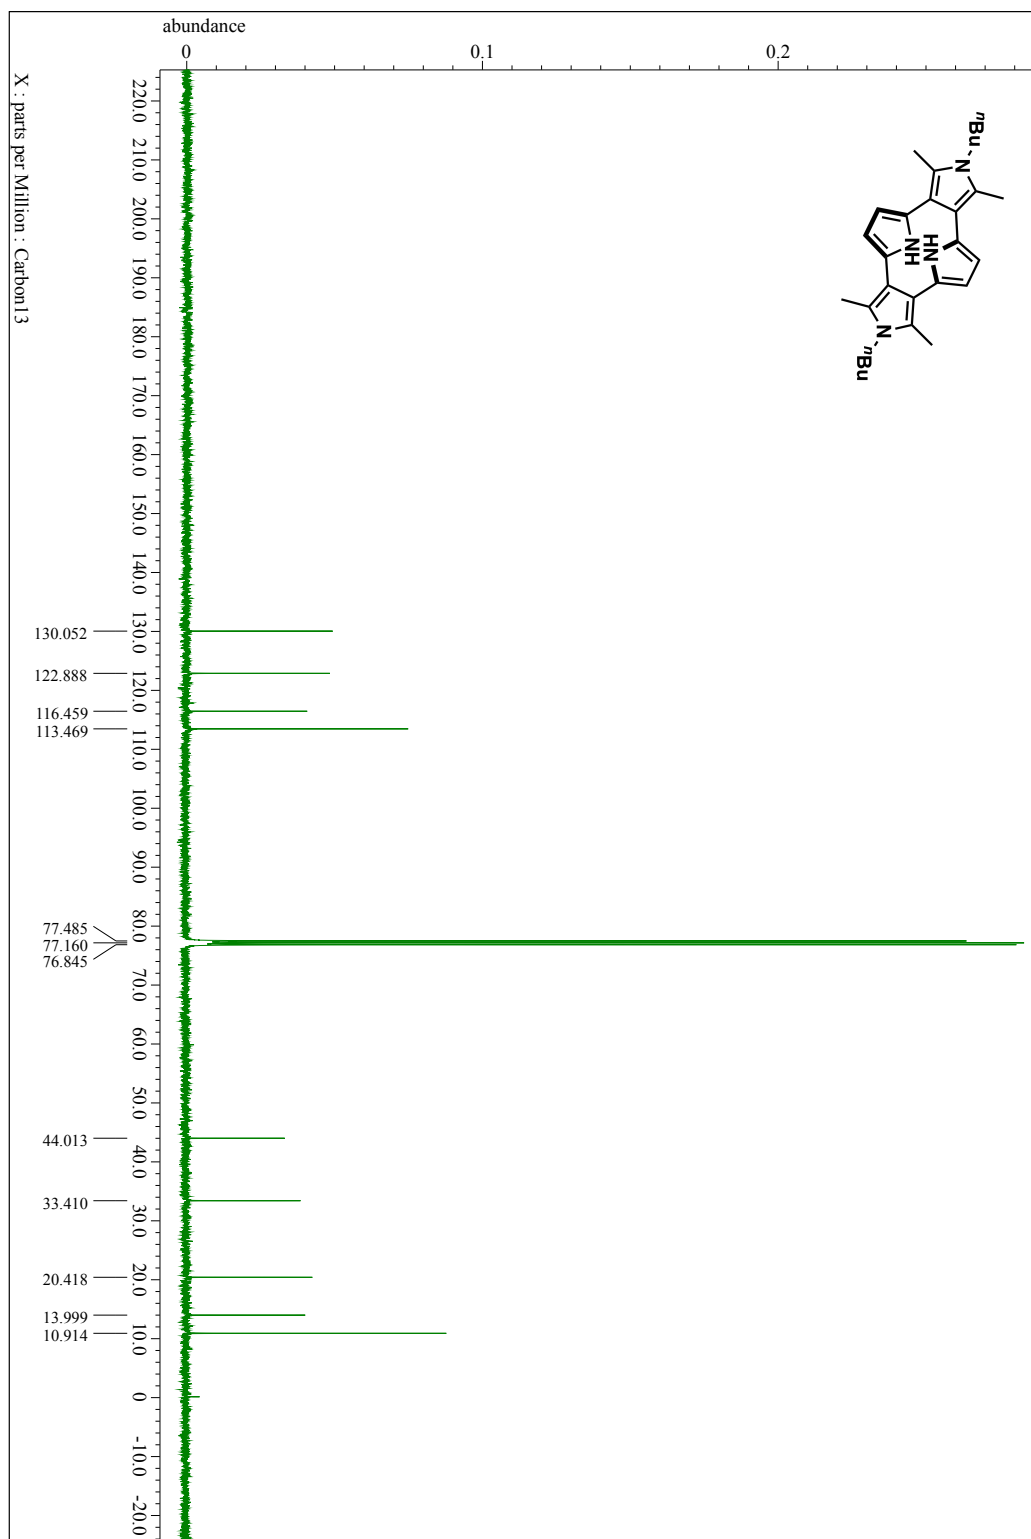

**Fig. S46**  $^{13}\text{C}\{^1\text{H}\}$  NMR spectrum of compound **3** (100 MHz,  $\text{CDCl}_3$ , 298 K).

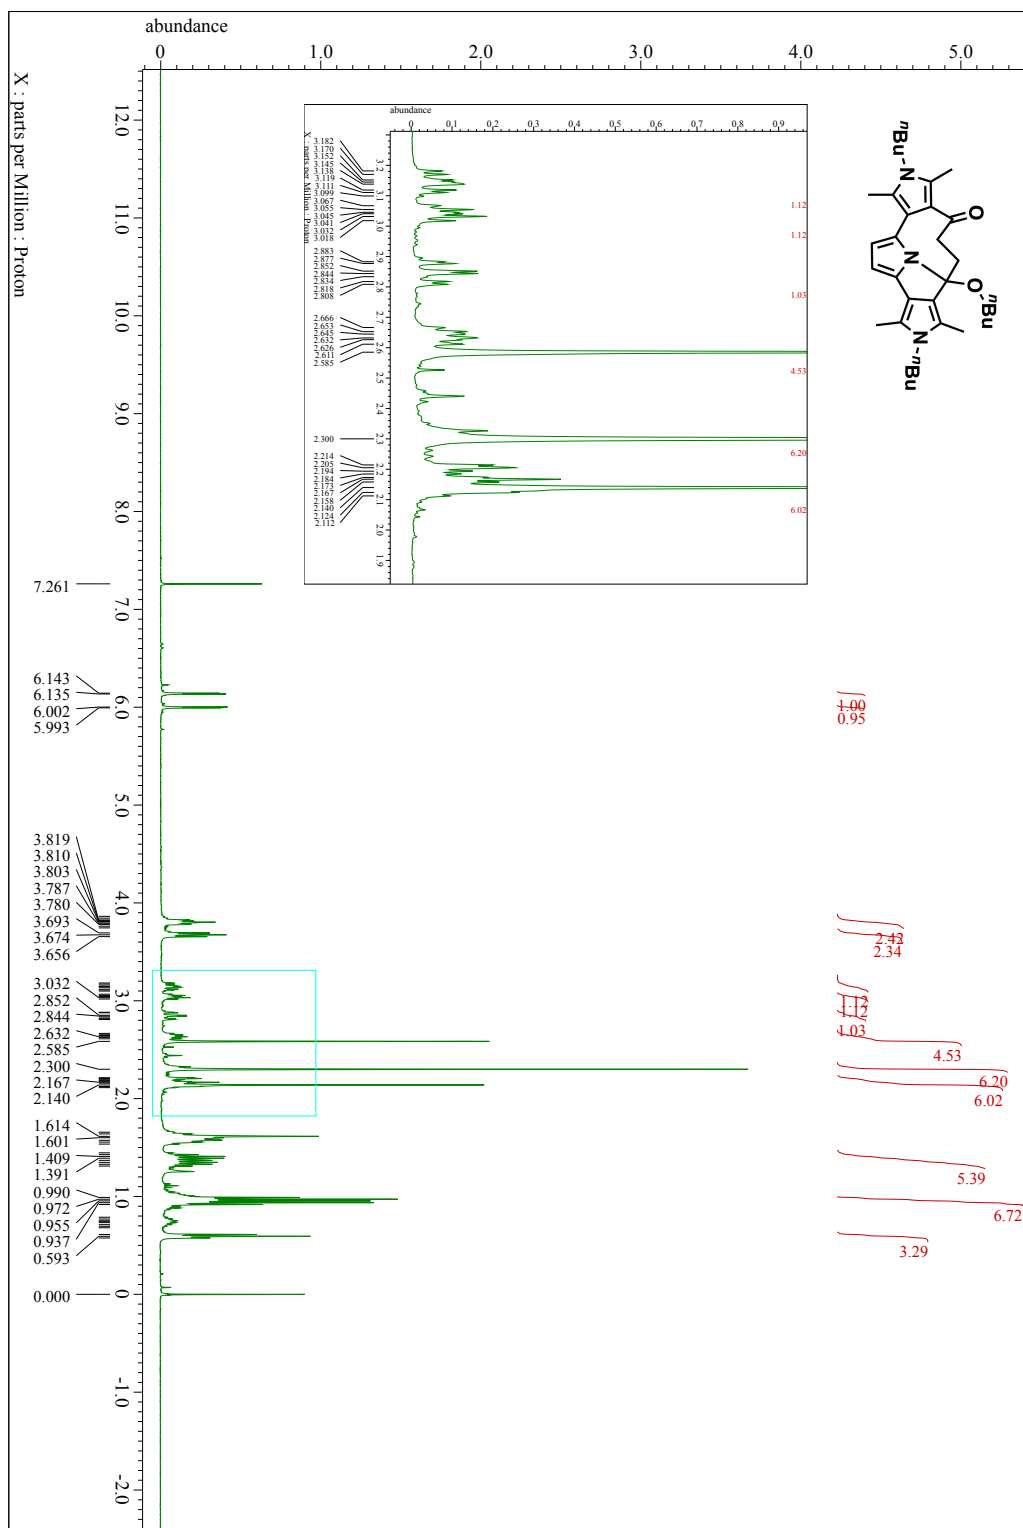

Fig. S47 <sup>1</sup>H NMR spectrum of compound **13** (400 MHz, CDCl<sub>3</sub>, 298 K).

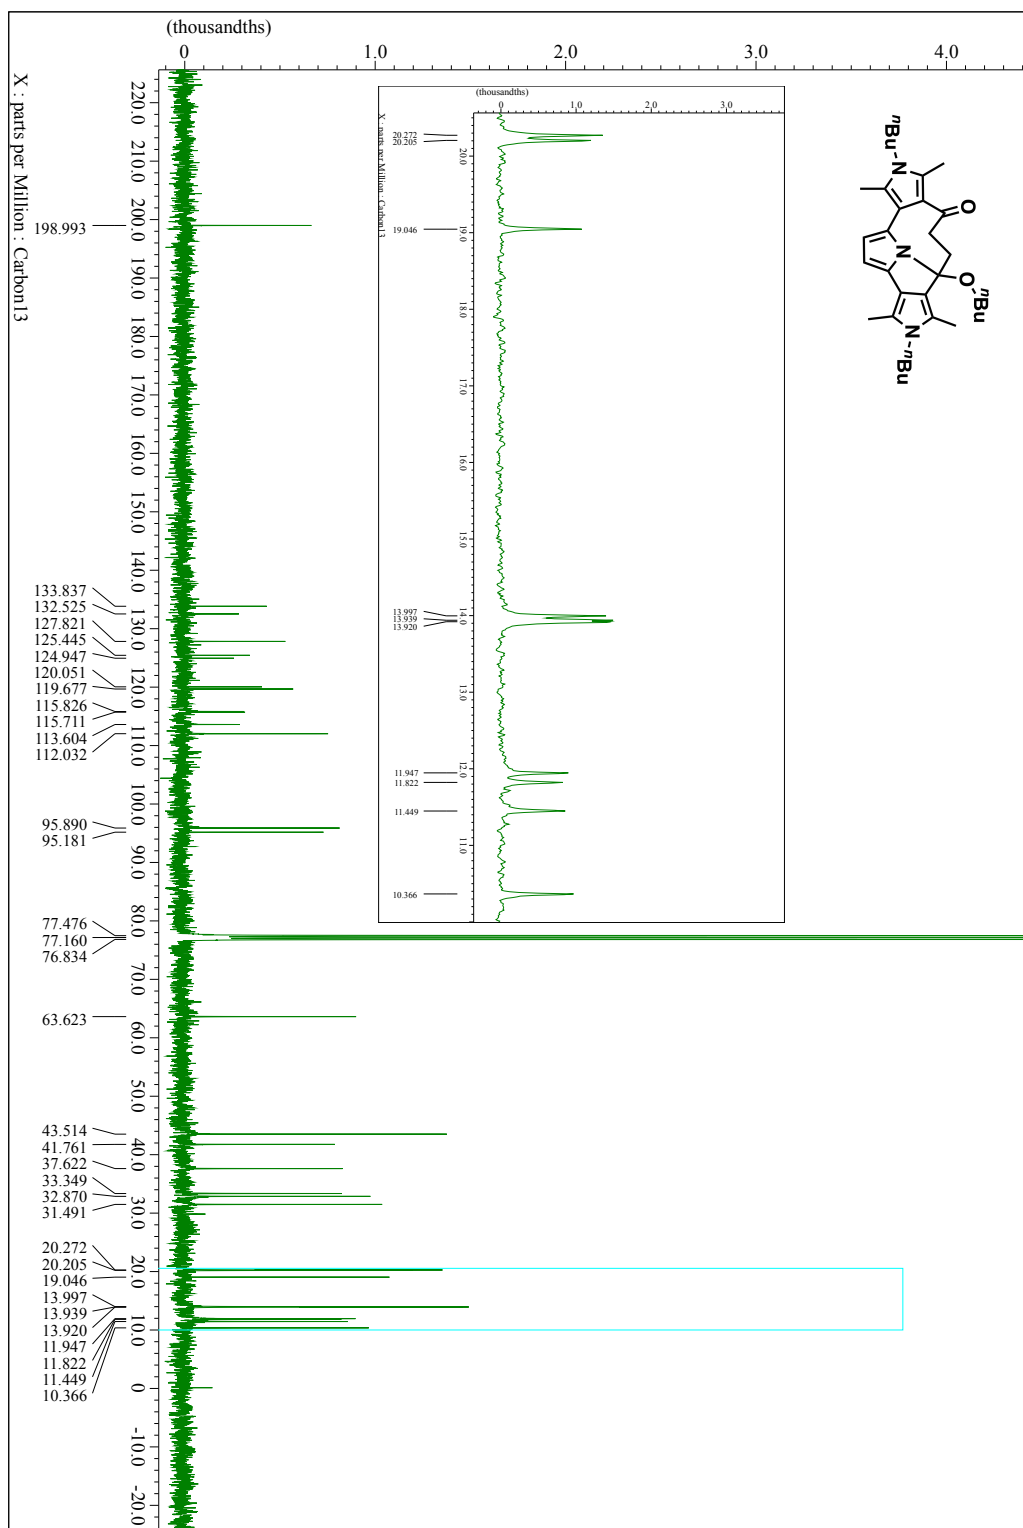

**Fig. S48**  $^{13}\text{C}\{^1\text{H}\}$  NMR spectrum of compound **13** (100 MHz,  $\text{CDCl}_3$ , 298 K).

## 11. Cartesian Coordinates for Optimized Structures

Coordinate and total energy of the lowest energy conformer of each compound shown in Figs. S3–S6.

compound 3

68 atoms

$E_{\text{tot}} = -1307.477985$  hartree

|   |              |             |             |
|---|--------------|-------------|-------------|
| C | 9.640853135  | 6.106863752 | 2.496612626 |
| C | 14.087168412 | 4.265660126 | 2.727531661 |
| C | 10.909958596 | 5.900531967 | 2.972353407 |
| C | 11.100944942 | 6.808788222 | 4.086271620 |
| C | 9.933135198  | 7.510511829 | 4.239538839 |
| C | 11.993301221 | 5.071035059 | 2.429398798 |
| C | 13.975673465 | 4.673468193 | 1.411631499 |
| C | 12.662257441 | 5.179073705 | 1.224781772 |
| C | 7.758546955  | 7.677287436 | 3.007400755 |
| C | 7.861351832  | 8.865999930 | 2.053181956 |
| C | 8.931469740  | 5.438623346 | 1.368699197 |
| C | 9.575677757  | 8.544041776 | 5.252431181 |
| C | 6.518755611  | 9.549284826 | 1.801752351 |
| C | 5.496375867  | 8.647457292 | 1.112720593 |
| C | 16.732506378 | 4.924973668 | 5.182507944 |
| C | 12.286170291 | 6.766111617 | 4.951625228 |
| C | 15.463361580 | 5.131205647 | 4.706834659 |
| C | 15.272439405 | 4.223050639 | 3.592826230 |
| C | 16.440344952 | 3.521509592 | 3.439413256 |
| C | 14.379989577 | 5.960640892 | 5.249815486 |
| C | 12.397581587 | 6.358218509 | 6.267504479 |
| C | 13.710970553 | 5.852550600 | 6.454391039 |
| C | 18.615125260 | 3.355098049 | 4.671348316 |
| C | 18.512845082 | 2.165973587 | 5.625101634 |
| C | 17.441848469 | 5.593149346 | 6.310486249 |
| C | 16.797940259 | 2.488250023 | 2.426296317 |
| C | 19.856146155 | 1.484506592 | 5.877821255 |
| C | 20.875660666 | 2.386878981 | 6.570391381 |
| N | 12.838604774 | 4.404612261 | 3.282958179 |
| N | 9.048975184  | 7.074746188 | 3.277795914 |
| N | 13.534754395 | 6.627145643 | 4.396252676 |
| N | 17.324475270 | 3.957262103 | 4.401188516 |
| H | 12.671393660 | 4.338104214 | 4.278360103 |
| H | 14.789511806 | 4.709106460 | 0.704720805 |
| H | 12.278799024 | 5.675541455 | 0.347410072 |
| H | 7.318830491  | 7.994775363 | 3.956025879 |
| H | 7.106939452  | 6.906392953 | 2.595298252 |
| H | 8.286833443  | 8.520560972 | 1.105682195 |

|   |              |              |             |
|---|--------------|--------------|-------------|
| H | 8.574632802  | 9.581827453  | 2.470013868 |
| H | 8.027862708  | 4.923907354  | 1.705902032 |
| H | 9.596943553  | 4.696717995  | 0.928799219 |
| H | 8.640567757  | 6.142200552  | 0.583780208 |
| H | 10.465801728 | 8.787916019  | 5.831533588 |
| H | 8.808935810  | 8.188358192  | 5.946520742 |
| H | 9.206416546  | 9.463644024  | 4.791482547 |
| H | 6.111442474  | 9.909124550  | 2.752101879 |
| H | 6.689030498  | 10.435760407 | 1.186656462 |
| H | 5.910699337  | 8.225035999  | 0.193937926 |
| H | 4.597151345  | 9.204629601  | 0.848133607 |
| H | 5.189070773  | 7.818314476  | 1.751859117 |
| H | 13.702007261 | 6.693679107  | 3.400859771 |
| H | 11.583704573 | 6.322572105  | 6.974369912 |
| H | 14.094369642 | 5.356024668  | 7.331755776 |
| H | 19.054978468 | 3.038146405  | 3.722616421 |
| H | 19.266401894 | 4.126105203  | 5.083735017 |
| H | 18.085799073 | 2.510554920  | 6.572235322 |
| H | 17.800997527 | 1.449281332  | 5.207250310 |
| H | 18.345269634 | 6.108199656  | 5.973295423 |
| H | 16.776225350 | 6.334765662  | 6.750648255 |
| H | 17.733054522 | 4.889457281  | 7.095194131 |
| H | 15.907817422 | 2.244280551  | 1.847231932 |
| H | 17.564527024 | 2.844251324  | 1.732198170 |
| H | 17.167463592 | 1.568645815  | 2.887023201 |
| H | 20.265856612 | 1.127017556  | 4.927617034 |
| H | 19.686279120 | 0.596670587  | 6.491058925 |
| H | 20.459119304 | 2.806185361  | 7.489621142 |
| H | 21.775720531 | 1.831004896  | 6.834899199 |
| H | 21.182096234 | 3.218249134  | 5.933696546 |

compound 4

36 atoms

$E_{\text{tot}} = -879.933251$  hartree

|   |              |              |             |
|---|--------------|--------------|-------------|
| C | 0.794872812  | 7.535137126  | 2.641712052 |
| C | 1.669335333  | 7.294321469  | 1.600795156 |
| C | 2.595212644  | 6.312953171  | 2.038119239 |
| C | 2.264603565  | 5.977386491  | 3.335919080 |
| C | 3.179395148  | 5.465138822  | 4.380997834 |
| C | 3.823257609  | 4.242833647  | 4.221461356 |
| C | 4.771613760  | 3.805446917  | 5.137611516 |
| C | 5.087633377  | 4.593279681  | 6.233451760 |
| C | 4.462135208  | 5.821652778  | 6.405720281 |
| C | 3.516919486  | 6.281418078  | 5.495168304 |
| N | 1.102525353  | 6.640947695  | 3.634423972 |
| C | 2.767556492  | 7.531462718  | 5.754056969 |
| C | 1.893093971  | 7.772278379  | 6.794973864 |
| C | 0.967216663  | 8.753646679  | 6.357649778 |
| C | 1.297825745  | 9.089213357  | 5.059849937 |
| C | 0.383034163  | 9.601461026  | 4.014771183 |
| C | -0.260828290 | 10.823766206 | 4.174307657 |
| C | -1.209184444 | 11.261152935 | 3.258157500 |
| C | -1.525204073 | 10.473320164 | 2.162317264 |
| C | -0.899705910 | 9.244947064  | 1.990048745 |
| C | 0.045509817  | 8.785181766  | 2.900600717 |
| N | 2.459903954  | 8.425652148  | 4.761345047 |
| H | 1.698488209  | 7.849256184  | 0.676727712 |
| H | 3.472859154  | 5.968609254  | 1.514817240 |
| H | 3.560532538  | 3.625711449  | 3.370742419 |
| H | 5.255829143  | 2.847622549  | 4.996054382 |
| H | 5.824884148  | 4.258556047  | 6.952007364 |
| H | 4.714989488  | 6.449277900  | 7.251720678 |
| H | 0.726021176  | 6.703621722  | 4.571475182 |
| H | 1.863941093  | 7.217343667  | 7.719041309 |
| H | 0.089570154  | 9.097990600  | 6.880951775 |
| H | 0.001896790  | 11.440888407 | 5.025026589 |
| H | -1.693399820 | 12.218977307 | 3.399714630 |
| H | -2.262454849 | 10.808043797 | 1.443761664 |
| H | -1.152560199 | 8.617321939  | 1.144048354 |
| H | 2.836408132  | 8.362978120  | 3.824293838 |

compound **10**

70 atoms

$E_{\text{tot}} = -1403.804178$  hartree

|   |              |              |              |
|---|--------------|--------------|--------------|
| C | 6.501226286  | 6.373077891  | 11.430540817 |
| C | 5.447129605  | 6.381429558  | 12.318494571 |
| C | 4.332159845  | 6.967928395  | 11.663690102 |
| C | 4.730576496  | 7.303631751  | 10.388774351 |
| C | 3.972671130  | 7.607944228  | 9.179558597  |
| C | 3.185419914  | 8.701583236  | 8.945187035  |
| C | 2.918190369  | 9.882579048  | 9.813620726  |
| C | 1.700760949  | 9.499625740  | 7.092956478  |
| C | 0.259934424  | 9.119426959  | 7.418344913  |
| C | -0.741644361 | 10.092347171 | 6.806769158  |
| C | -2.183871608 | 9.718499816  | 7.131110369  |
| C | 3.106941911  | 7.428045662  | 7.086836054  |
| C | 2.678174748  | 7.023122028  | 5.716496457  |
| C | 3.936113223  | 6.783252233  | 7.995979855  |
| C | 4.564335487  | 5.477171453  | 7.720994087  |
| C | 5.110298343  | 4.595575836  | 8.843606423  |
| C | 6.635770785  | 4.451904889  | 8.662642667  |
| C | 7.324204409  | 3.694817815  | 9.790419827  |
| C | 8.099231071  | 4.436263461  | 10.813724560 |
| C | 9.303858199  | 3.990339076  | 11.321430868 |
| C | 10.084745585 | 2.763047308  | 10.990607024 |
| C | 11.006435239 | 4.882016729  | 12.945567225 |
| C | 12.040122786 | 5.818416794  | 12.319532597 |
| C | 12.427142869 | 5.454906623  | 10.890289505 |
| C | 13.397076909 | 6.466136092  | 10.288461008 |
| C | 8.798591594  | 5.913193450  | 12.380054738 |
| C | 8.909634167  | 6.986621303  | 13.408834700 |
| C | 7.784304603  | 5.669180527  | 11.490943762 |
| N | 6.057756896  | 6.986217989  | 10.290500608 |
| N | 2.664969600  | 8.578639311  | 7.671047966  |
| N | 9.726117622  | 4.900130015  | 12.255473421 |
| O | 4.660541590  | 5.064062364  | 6.578944544  |
| O | 7.287932205  | 2.481511036  | 9.793149717  |
| H | 5.469888488  | 5.945212491  | 13.304254821 |
| H | 3.325419556  | 7.053671325  | 12.039938327 |
| H | 6.609479995  | 7.129100343  | 9.461244680  |
| H | 3.453045364  | 9.750703267  | 10.753288066 |
| H | 1.855600028  | 9.997931835  | 10.041960736 |
| H | 3.264273716  | 10.812067656 | 9.353844488  |
| H | 1.855254145  | 9.529172668  | 6.013520321  |
| H | 1.919279531  | 10.499343720 | 7.471925995  |
| H | 0.136775330  | 9.087956073  | 8.505344964  |
| H | 0.066231682  | 8.104734611  | 7.057182002  |

|   |              |              |              |
|---|--------------|--------------|--------------|
| H | -0.531913211 | 11.103497945 | 7.169533365  |
| H | -0.602767151 | 10.119234337 | 5.721419461  |
| H | -2.420618880 | 8.721757523  | 6.753797219  |
| H | -2.887900839 | 10.422077768 | 6.686001298  |
| H | -2.350408275 | 9.713208157  | 8.210117760  |
| H | 1.660011710  | 7.350077491  | 5.502498711  |
| H | 2.736652786  | 5.942575258  | 5.620131534  |
| H | 3.341966387  | 7.444846499  | 4.957100034  |
| H | 4.662518819  | 3.609286438  | 8.707065524  |
| H | 4.842290070  | 4.953438999  | 9.835147687  |
| H | 6.807961560  | 3.876282762  | 7.752428814  |
| H | 7.110056013  | 5.422991779  | 8.524023029  |
| H | 11.115522325 | 2.995654790  | 10.719610570 |
| H | 9.606470431  | 2.245068984  | 10.163932858 |
| H | 10.103477438 | 2.073014362  | 11.838332633 |
| H | 11.373959676 | 3.855266762  | 12.942931694 |
| H | 10.832302071 | 5.160363162  | 13.986611764 |
| H | 11.653326217 | 6.841276963  | 12.335860980 |
| H | 12.931459120 | 5.811924962  | 12.954917534 |
| H | 11.524665547 | 5.396225571  | 10.274254570 |
| H | 12.882843592 | 4.459940774  | 10.880602219 |
| H | 12.949485859 | 7.461673160  | 10.258657383 |
| H | 13.675527093 | 6.193707640  | 9.270152175  |
| H | 14.312123619 | 6.530515026  | 10.881233212 |
| H | 8.053576685  | 7.652707636  | 13.310292297 |
| H | 9.819361356  | 7.580471838  | 13.300936574 |
| H | 8.899825251  | 6.574747643  | 14.421650969 |

Coordinate and total energy of the lowest energy conformer of each compound shown in **Figure S15–S18**.

### Macrocycle 3

68 atoms

$E_{\text{tot}} = -1307.981311$  hartree

|   |              |              |            |
|---|--------------|--------------|------------|
| C | -1.060179000 | -1.595921000 | 0.0301230  |
| C | -0.494079000 | -2.539439000 | -0.8210040 |
| C | 0.917584000  | -2.459556000 | -0.6887790 |
| C | -1.207437000 | 1.467883000  | -0.2426150 |
| C | -2.377787000 | 0.584386000  | -0.3482940 |
| C | -2.321089000 | -0.849931000 | -0.0902530 |
| C | -3.613676000 | -1.324956000 | -0.1538190 |
| C | -3.702375000 | 0.908695000  | -0.5501390 |



|   |              |              |            |
|---|--------------|--------------|------------|
| C | -4.111406000 | -2.723426000 | 0.0171170  |
| C | -4.305470000 | 2.235829000  | -0.8774670 |
| C | -5.903137000 | -0.327992000 | -0.5110000 |
| C | -6.597681000 | -0.116548000 | 0.8441300  |
| C | -8.842720000 | 0.822952000  | -0.0227980 |
| H | 0.112062000  | 0.249609000  | -1.3440970 |
| H | -1.037052000 | -3.133117000 | -1.5407370 |
| H | 1.647433000  | -2.981476000 | -1.2889900 |
| H | -4.876547000 | 2.211460000  | -1.8126220 |
| H | -3.504847000 | 2.966405000  | -0.9985350 |
| H | -4.976725000 | 2.605141000  | -0.0937110 |
| H | -3.278102000 | -3.360403000 | 0.3162740  |
| H | -4.527567000 | -3.137362000 | -0.9093350 |
| H | -4.885780000 | -2.802989000 | 0.7876250  |
| H | -6.175131000 | -1.306232000 | -0.9159840 |
| H | -6.241643000 | 0.414346000  | -1.2356240 |
| H | -8.562999000 | 0.805889000  | -1.0796780 |
| N | -0.010485000 | -1.056501000 | 0.7467450  |
| N | -4.449197000 | -0.254642000 | -0.4362870 |
| H | -8.608602000 | 1.818833000  | 0.3664030  |
| C | -8.125455000 | -0.265771000 | 0.7844510  |
| H | -6.336774000 | 0.875426000  | 1.2293870  |
| H | -6.189627000 | -0.839134000 | 1.5576830  |
| H | -8.377322000 | -1.251975000 | 0.3748680  |
| H | -8.511384000 | -0.259541000 | 1.8090870  |
| H | -9.927265000 | 0.695401000  | 0.0267640  |
| C | 8.125448000  | 0.265771000  | -0.7844840 |
| H | 6.336757000  | -0.875414000 | -1.2294110 |
| H | 6.189617000  | 0.839150000  | -1.5576900 |
| H | 8.377323000  | 1.251975000  | -0.3749060 |
| H | 8.511363000  | 0.259538000  | -1.8091250 |
| H | 9.927265000  | -0.695399000 | -0.0268160 |
| H | 8.608601000  | -1.818833000 | -0.3664400 |
| C | 1.060180000  | 1.595919000  | -0.0301160 |
| C | 0.494078000  | 2.539438000  | 0.8210110  |
| C | -0.917584000 | 2.459563000  | 0.6887750  |

|   |              |              |            |
|---|--------------|--------------|------------|
| C | 1.207439000  | -1.467884000 | 0.2426190  |
| C | 2.377789000  | -0.584388000 | 0.3483030  |
| C | 2.321090000  | 0.849930000  | 0.0902630  |
| C | 3.613675000  | 1.324958000  | 0.1538400  |
| C | 3.702377000  | -0.908697000 | 0.5501420  |
| C | 4.111405000  | 2.723429000  | -0.0170810 |
| C | 4.305472000  | -2.235830000 | 0.8774780  |
| C | 5.903141000  | 0.327987000  | 0.5109910  |
| C | 6.597673000  | 0.116554000  | -0.8441470 |
| C | 8.842721000  | -0.822952000 | 0.0227580  |
| H | -0.112059000 | -0.249608000 | 1.3441000  |
| H | 1.037051000  | 3.133113000  | 1.5407470  |
| H | -1.647435000 | 2.981489000  | 1.2889780  |
| H | 4.876519000  | -2.211463000 | 1.8126520  |
| H | 3.504850000  | -2.966412000 | 0.9985150  |
| H | 4.976755000  | -2.605131000 | 0.0937410  |
| H | 3.278103000  | 3.360408000  | -0.3162380 |
| H | 4.527560000  | 3.137359000  | 0.9093770  |
| H | 4.885784000  | 2.802998000  | -0.7875830 |
| H | 6.175137000  | 1.306223000  | 0.9159830  |
| H | 6.241650000  | -0.414359000 | 1.2356060  |
| H | 8.563011000  | -0.805889000 | 1.0796400  |
| N | 0.010487000  | 1.056497000  | -0.7467370 |
| N | 4.449199000  | 0.254640000  | 0.4362880  |

### Macrocycle 3<sup>2+</sup>

68 atoms

$E_{\text{tot}} = -1307.776599$  hartree

|   |              |              |           |
|---|--------------|--------------|-----------|
| C | 1.060000000  | -1.703000000 | 0.3330000 |
| C | 0.492000000  | -2.454000000 | 1.3560000 |
| C | -0.920000000 | -2.374000000 | 1.2280000 |
| C | 1.199000000  | 1.356000000  | 0.6390000 |
| C | 2.356000000  | 0.515000000  | 0.5530000 |
| C | 2.316000000  | -0.933000000 | 0.3320000 |
| C | 3.612000000  | -1.351000000 | 0.1920000 |
| C | 3.709000000  | 0.892000000  | 0.5300000 |

|   |              |              |            |
|---|--------------|--------------|------------|
| C | 4.135000000  | -2.726000000 | -0.0550000 |
| C | 4.316000000  | 2.237000000  | 0.7570000  |
| C | 5.910000000  | -0.275000000 | 0.2040000  |
| C | 6.402000000  | -0.067000000 | -1.2360000 |
| C | 8.718000000  | 0.930000000  | -0.6720000 |
| H | -0.099000000 | -0.071000000 | 1.4860000  |
| H | 1.036000000  | -2.917000000 | 2.1640000  |
| H | -1.649000000 | -2.766000000 | 1.9200000  |
| H | 5.040000000  | 2.215000000  | 1.5770000  |
| H | 3.546000000  | 2.957000000  | 1.0280000  |
| H | 4.837000000  | 2.609000000  | -0.1300000 |
| H | 3.295000000  | -3.407000000 | -0.1940000 |
| H | 4.727000000  | -3.096000000 | 0.7880000  |
| H | 4.763000000  | -2.776000000 | -0.9490000 |
| H | 6.246000000  | -1.242000000 | 0.5820000  |
| H | 6.320000000  | 0.484000000  | 0.8710000  |
| H | 8.592000000  | 0.908000000  | 0.4150000  |
| N | 0.009000000  | -1.284000000 | -0.4610000 |
| N | 4.447000000  | -0.234000000 | 0.3260000  |
| H | 8.411000000  | 1.919000000  | -1.0260000 |
| C | 7.928000000  | -0.179000000 | -1.3750000 |
| H | 6.070000000  | 0.915000000  | -1.5930000 |
| H | 5.922000000  | -0.809000000 | -1.8810000 |
| H | 8.255000000  | -1.158000000 | -1.0050000 |
| H | 8.169000000  | -0.167000000 | -2.4420000 |
| H | 9.787000000  | 0.828000000  | -0.8710000 |
| C | -8.167000000 | 0.360000000  | 0.1520000  |
| H | -6.485000000 | -0.798000000 | 0.8800000  |
| H | -6.364000000 | 0.919000000  | 1.2100000  |
| H | -8.340000000 | 1.348000000  | -0.2920000 |
| H | -8.699000000 | 0.364000000  | 1.1080000  |
| H | -9.842000000 | -0.583000000 | -0.8610000 |
| H | -8.608000000 | -1.722000000 | -0.3260000 |
| C | -1.057000000 | 1.483000000  | 0.4340000  |
| C | -0.495000000 | 2.681000000  | -0.1110000 |
| C | 0.880000000  | 2.603000000  | 0.0140000  |

|   |              |              |            |
|---|--------------|--------------|------------|
| C | -1.207000000 | -1.576000000 | 0.1270000  |
| C | -2.349000000 | -0.670000000 | -0.0900000 |
| C | -2.266000000 | 0.775000000  | 0.1340000  |
| C | -3.539000000 | 1.303000000  | -0.1420000 |
| C | -3.634000000 | -0.941000000 | -0.4790000 |
| C | -4.015000000 | 2.715000000  | -0.0560000 |
| C | -4.240000000 | -2.242000000 | -0.8830000 |
| C | -5.782000000 | 0.377000000  | -0.7910000 |
| C | -6.668000000 | 0.192000000  | 0.4500000  |
| C | -8.765000000 | -0.725000000 | -0.7500000 |
| H | 0.115000000  | -0.633000000 | -1.2240000 |
| H | -1.044000000 | 3.439000000  | -0.6460000 |
| H | 1.598000000  | 3.290000000  | -0.4060000 |
| H | -4.618000000 | -2.215000000 | -1.9100000 |
| H | -3.481000000 | -3.022000000 | -0.8270000 |
| H | -5.070000000 | -2.534000000 | -0.2330000 |
| H | -3.257000000 | 3.340000000  | 0.4160000  |
| H | -4.228000000 | 3.131000000  | -1.0470000 |
| H | -4.927000000 | 2.802000000  | 0.5400000  |
| H | -5.957000000 | 1.356000000  | -1.2400000 |
| H | -6.017000000 | -0.366000000 | -1.5530000 |
| H | -8.335000000 | -0.717000000 | -1.7550000 |
| N | -0.006000000 | 0.818000000  | 1.0110000  |
| N | -4.347000000 | 0.265000000  | -0.4960000 |

Macrocycle  $3^{2+}$  (closed shell, singlet)

68 atoms

$E_{\text{tot}} = -1307.441161$  hartree

|   |              |              |           |
|---|--------------|--------------|-----------|
| C | 1.056524000  | -1.760222000 | 0.4574100 |
| C | 0.492133000  | -2.454262000 | 1.5214080 |
| C | -0.920035000 | -2.374929000 | 1.3954490 |
| C | 1.190751000  | 1.281412000  | 0.8011670 |
| C | 2.321391000  | 0.482446000  | 0.6234470 |
| C | 2.306482000  | -0.978314000 | 0.4219150 |
| C | 3.591946000  | -1.361417000 | 0.2040020 |
| C | 3.698388000  | 0.896936000  | 0.5092030 |

|   |              |              |            |
|---|--------------|--------------|------------|
| C | 4.146716000  | -2.712275000 | -0.0726120 |
| C | 4.291842000  | 2.249854000  | 0.6961040  |
| C | 5.887037000  | -0.230203000 | 0.0863370  |
| C | 6.291257000  | -0.041215000 | -1.3852610 |
| C | 8.622882000  | 0.981731000  | -0.9348690 |
| H | -0.097071000 | -0.203814000 | 1.5649660  |
| H | 1.035052000  | -2.885154000 | 2.3484860  |
| H | -1.644939000 | -2.734568000 | 2.1093420  |
| H | 5.064106000  | 2.230877000  | 1.4707550  |
| H | 3.541429000  | 2.971037000  | 1.0099150  |
| H | 4.763150000  | 2.609242000  | -0.2234250 |
| H | 3.326879000  | -3.422702000 | -0.1764920 |
| H | 4.786142000  | -3.058563000 | 0.7459550  |
| H | 4.739680000  | -2.734202000 | -0.9903300 |
| H | 6.242293000  | -1.188852000 | 0.4638910  |
| H | 6.318876000  | 0.545991000  | 0.7167720  |
| H | 8.564637000  | 0.958174000  | 0.1574510  |
| N | 0.006308000  | -1.365776000 | -0.3499920 |
| N | 4.421745000  | -0.199010000 | 0.2838640  |
| H | 8.288160000  | 1.967166000  | -1.2733220 |
| C | 7.812337000  | -0.138706000 | -1.5940730 |
| H | 5.932255000  | 0.931911000  | -1.7383340 |
| H | 5.790382000  | -0.800486000 | -1.9933270 |
| H | 8.165300000  | -1.114154000 | -1.2408580 |
| H | 7.993894000  | -0.127657000 | -2.6722910 |
| H | 9.678949000  | 0.890948000  | -1.1948780 |
| C | -8.135799000 | 0.399368000  | -0.0837410 |
| H | -6.496074000 | -0.747659000 | 0.7513170  |
| H | -6.399234000 | 0.974677000  | 1.0765150  |
| H | -8.289842000 | 1.387757000  | -0.5317420 |
| H | -8.717741000 | 0.396588000  | 0.8419540  |
| H | -9.741816000 | -0.552441000 | -1.1875200 |
| H | -8.534864000 | -1.685699000 | -0.5890210 |
| C | -1.058564000 | 1.406993000  | 0.5998350  |
| C | -0.496671000 | 2.705125000  | 0.2089630  |
| C | 0.852854000  | 2.629859000  | 0.3292230  |

|   |              |              |            |
|---|--------------|--------------|------------|
| C | -1.207173000 | -1.633252000 | 0.2554370  |
| C | -2.336536000 | -0.717303000 | 0.0085500  |
| C | -2.221313000 | 0.738201000  | 0.2171600  |
| C | -3.496311000 | 1.305872000  | -0.1493240 |
| C | -3.593132000 | -0.953418000 | -0.4511190 |
| C | -3.941553000 | 2.726912000  | -0.1007410 |
| C | -4.219197000 | -2.226186000 | -0.8952030 |
| C | -5.710373000 | 0.421265000  | -0.8921820 |
| C | -6.656129000 | 0.239959000  | 0.3065500  |
| C | -8.672196000 | -0.689004000 | -1.0189900 |
| H | 0.112125000  | -0.804471000 | -1.1816790 |
| H | -1.052824000 | 3.520426000  | -0.2248530 |
| H | 1.562377000  | 3.374578000  | 0.0067160  |
| H | -4.521988000 | -2.182494000 | -1.9457480 |
| H | -3.501113000 | -3.038023000 | -0.7832490 |
| H | -5.105193000 | -2.473997000 | -0.3040080 |
| H | -3.251115000 | 3.335754000  | 0.4785800  |
| H | -4.013197000 | 3.147211000  | -1.1104530 |
| H | -4.925786000 | 2.819704000  | 0.3617620  |
| H | -5.847542000 | 1.400360000  | -1.3515620 |
| H | -5.901363000 | -0.324733000 | -1.6620130 |
| H | -8.193506000 | -0.673653000 | -2.0027760 |
| N | -0.007844000 | 0.712813000  | 1.1363850  |
| N | -4.285327000 | 0.297626000  | -0.5146510 |

Macrocycle  $3^{2+}$  (open shell, singlet)

68 atoms

$E_{\text{tot}} = -1307.438116$  hartree

|   |              |              |            |
|---|--------------|--------------|------------|
| C | 1.063305000  | -1.601895000 | -0.0884580 |
| C | 0.495870000  | -2.719639000 | 0.6035050  |
| C | -0.879521000 | -2.646114000 | 0.4782130  |
| C | 1.191695000  | 1.482060000  | 0.2946060  |
| C | 2.334900000  | 0.609744000  | 0.2872240  |
| C | 2.270423000  | -0.854869000 | 0.1350560  |
| C | 3.581596000  | -1.323776000 | 0.2324060  |
| C | 3.681597000  | 0.934668000  | 0.4509810  |

|   |              |              |            |
|---|--------------|--------------|------------|
| C | 4.093068000  | -2.716953000 | 0.1122890  |
| C | 4.301028000  | 2.259256000  | 0.7304880  |
| C | 5.879031000  | -0.311514000 | 0.5118560  |
| C | 6.573469000  | -0.170290000 | -0.8514400 |
| C | 8.789034000  | 0.837865000  | 0.0193110  |
| H | -0.112780000 | 0.211186000  | 1.3572380  |
| H | 1.044237000  | -3.407128000 | 1.2282890  |
| H | -1.601052000 | -3.265591000 | 0.9874770  |
| H | 4.813221000  | 2.262229000  | 1.6975810  |
| H | 3.540065000  | 3.037469000  | 0.7614340  |
| H | 5.037403000  | 2.528801000  | -0.0316350 |
| H | 3.287917000  | -3.396045000 | -0.1642540 |
| H | 4.520481000  | -3.064161000 | 1.0589410  |
| H | 4.872328000  | -2.798270000 | -0.6492150 |
| H | 6.128156000  | -1.266354000 | 0.9752880  |
| H | 6.198031000  | 0.469743000  | 1.2005230  |
| H | 8.510067000  | 0.858066000  | 1.0770550  |
| N | 0.014779000  | -1.008580000 | -0.7474560 |
| N | 4.404446000  | -0.236855000 | 0.4166820  |
| H | 8.550700000  | 1.813906000  | -0.4143330 |
| C | 8.103417000  | -0.295406000 | -0.7508160 |
| H | 6.311317000  | 0.796338000  | -1.2953140 |
| H | 6.188446000  | -0.939087000 | -1.5287580 |
| H | 8.360200000  | -1.261653000 | -0.3016840 |
| H | 8.496871000  | -0.325946000 | -1.7705260 |
| H | 9.873668000  | 0.722181000  | -0.0179430 |
| C | -8.103417000 | 0.295409000  | 0.7508140  |
| H | -6.311318000 | -0.796335000 | 1.2953140  |
| H | -6.188445000 | 0.939090000  | 1.5287550  |
| H | -8.360200000 | 1.261655000  | 0.3016790  |
| H | -8.496871000 | 0.325952000  | 1.7705230  |
| H | -9.873669000 | -0.722178000 | 0.0179430  |
| H | -8.550702000 | -1.813904000 | 0.4143360  |
| C | -1.063305000 | 1.601894000  | 0.0884570  |
| C | -0.495871000 | 2.719639000  | -0.6035050 |
| C | 0.879520000  | 2.646111000  | -0.4782190 |

|   |              |              |            |
|---|--------------|--------------|------------|
| C | -1.191694000 | -1.482060000 | -0.2946080 |
| C | -2.334900000 | -0.609745000 | -0.2872240 |
| C | -2.270423000 | 0.854869000  | -0.1350550 |
| C | -3.581596000 | 1.323775000  | -0.2324050 |
| C | -3.681597000 | -0.934669000 | -0.4509770 |
| C | -4.093067000 | 2.716952000  | -0.1122890 |
| C | -4.301028000 | -2.259257000 | -0.7304830 |
| C | -5.879030000 | 0.311514000  | -0.5118570 |
| C | -6.573469000 | 0.170292000  | 0.8514390  |
| C | -8.789035000 | -0.837863000 | -0.0193100 |
| H | 0.112781000  | -0.211184000 | -1.3572370 |
| H | -1.044239000 | 3.407129000  | -1.2282870 |
| H | 1.601050000  | 3.265586000  | -0.9874860 |
| H | -4.813222000 | -2.262231000 | -1.6975750 |
| H | -3.540066000 | -3.037470000 | -0.7614270 |
| H | -5.037403000 | -2.528801000 | 0.0316420  |
| H | -3.287916000 | 3.396044000  | 0.1642540  |
| H | -4.520480000 | 3.064160000  | -1.0589410 |
| H | -4.872327000 | 2.798270000  | 0.6492150  |
| H | -6.128155000 | 1.266353000  | -0.9752900 |
| H | -6.198029000 | -0.469744000 | -1.2005230 |
| H | -8.510068000 | -0.858067000 | -1.0770540 |
| N | -0.014779000 | 1.008580000  | 0.7474560  |
| N | -4.404445000 | 0.236854000  | -0.4166820 |

Macrocycle  $3^{2+}$  (open shell, triplet)

68 atoms

$E_{\text{tot}} = -1307.440678$  hartree

|   |              |              |            |
|---|--------------|--------------|------------|
| C | -1.063244000 | 1.601772000  | -0.0885180 |
| C | -0.495927000 | 2.715073000  | 0.6072640  |
| C | 0.880577000  | 2.641448000  | 0.4816910  |
| C | -1.192139000 | -1.481723000 | 0.2948790  |
| C | -2.333832000 | -0.606010000 | 0.2866050  |
| C | -2.269496000 | 0.851516000  | 0.1352700  |
| C | -3.583933000 | 1.322453000  | 0.2314770  |
| C | -3.684002000 | -0.932286000 | 0.4513570  |



|   |              |              |            |
|---|--------------|--------------|------------|
| C | -4.092616000 | 2.715504000  | 0.1086490  |
| C | -4.300630000 | -2.256713000 | 0.7332570  |
| C | -5.883764000 | 0.312232000  | 0.5113750  |
| C | -6.578317000 | 0.170876000  | -0.8513930 |
| C | -8.793073000 | -0.839499000 | 0.0188200  |
| H | 0.112716000  | -0.210523000 | 1.3565470  |
| H | -1.043257000 | 3.401593000  | 1.2340360  |
| H | 1.601504000  | 3.259975000  | 0.9929810  |
| H | -4.804247000 | -2.260721000 | 1.7050500  |
| H | -3.540156000 | -3.035547000 | 0.7553850  |
| H | -5.045155000 | -2.522820000 | -0.0222240 |
| H | -3.285329000 | 3.394183000  | -0.1621440 |
| H | -4.526501000 | 3.061467000  | 1.0529530  |
| H | -4.867713000 | 2.797272000  | -0.6572350 |
| H | -6.132316000 | 1.267240000  | 0.9748540  |
| H | -6.202417000 | -0.468373000 | 1.2009130  |
| H | -8.513851000 | -0.860426000 | 1.0764790  |
| N | -0.014626000 | 1.008406000  | -0.7474380 |
| N | -4.408507000 | 0.237518000  | 0.4164120  |
| H | -8.554245000 | -1.815026000 | -0.4157250 |
| C | -8.108391000 | 0.294859000  | -0.7506130 |
| H | -6.315765000 | -0.795469000 | -1.2957650 |
| H | -6.194168000 | 0.940008000  | -1.5288700 |
| H | -8.365764000 | 1.260586000  | -0.3006790 |
| H | -8.502086000 | 0.325897000  | -1.7701720 |
| H | -9.877785000 | -0.724516000 | -0.0180980 |
| C | 8.108392000  | -0.294858000 | 0.7506110  |
| H | 6.315766000  | 0.795471000  | 1.2957620  |
| H | 6.194168000  | -0.940006000 | 1.5288700  |
| H | 8.365764000  | -1.260585000 | 0.3006790  |
| H | 8.502087000  | -0.325894000 | 1.7701710  |
| H | 9.877786000  | 0.724516000  | 0.0180940  |
| H | 8.554245000  | 1.815026000  | 0.4157210  |
| C | 1.063243000  | -1.601772000 | 0.0885210  |
| C | 0.495927000  | -2.715074000 | -0.6072610 |
| C | -0.880577000 | -2.641447000 | -0.4816910 |

|   |              |              |            |
|---|--------------|--------------|------------|
| C | 1.192139000  | 1.481723000  | -0.2948790 |
| C | 2.333832000  | 0.606010000  | -0.2866050 |
| C | 2.269496000  | -0.851516000 | -0.1352680 |
| C | 3.583933000  | -1.322453000 | -0.2314760 |
| C | 3.684002000  | 0.932285000  | -0.4513580 |
| C | 4.092616000  | -2.715504000 | -0.1086460 |
| C | 4.300629000  | 2.256713000  | -0.7332600 |
| C | 5.883764000  | -0.312233000 | -0.5113760 |
| C | 6.578317000  | -0.170875000 | 0.8513910  |
| C | 8.793074000  | 0.839498000  | -0.0188240 |
| H | -0.112717000 | 0.210523000  | -1.3565450 |
| H | 1.043258000  | -3.401595000 | -1.2340320 |
| H | -1.601504000 | -3.259973000 | -0.9929820 |
| H | 4.804246000  | 2.260720000  | -1.7050530 |
| H | 3.540156000  | 3.035547000  | -0.7553870 |
| H | 5.045156000  | 2.522820000  | 0.0222210  |
| H | 3.285330000  | -3.394183000 | 0.1621490  |
| H | 4.526500000  | -3.061468000 | -1.0529500 |
| H | 4.867713000  | -2.797271000 | 0.6572380  |
| H | 6.132316000  | -1.267241000 | -0.9748540 |
| H | 6.202416000  | 0.468372000  | -1.2009160 |
| H | 8.513851000  | 0.860425000  | -1.0764830 |
| N | 0.014626000  | -1.008406000 | 0.7474400  |
| N | 4.408507000  | -0.237518000 | -0.4164120 |

## 12. References

- S1. R. G. Charles, *Org. Synth.*, 1959, **39**, 61.
- S2. G. M. Sheldrick, *Acta Cryst.*, 2015, **A71**, 3–8.
- S3. G. M. Sheldrick, *Acta Cryst.*, 2015, **C71**, 3–8.
- S4. M. E. Hoque, R. Bisht, C. Haldar, B. Chattopadhyay, *J. Am. Chem. Soc.*, 2017, **139**, 7745–7748.
- S5. <https://global.hpc.co.jp/products/grrm23/> (accessed August 26, 2024)
- S6. Y. Morimoto, Y. H. Koo, K. Otsubo, H. Kitakado, S. Seki, A. Osuka, T. Tanaka, *Angew. Chem. Int. Ed.*, 2022, **61**, e202200341.
- S7. Y. Zhao, D. G. Truhlar, *Theor. Chem. Account.*, 2008, **120**, 215–241.
- S8. M. J. Frisch, G. W. Trucks, H. B. Schlegel, G. E. Scuseria, M. A. Robb, J. R. Cheeseman, G. Scalmani, V. Barone, G. A. Petersson, H. Nakatsuji, X. Li, M. Caricato, A. V. Marenich, J. Bloino, B. G. Janesko, R. Gomperts, B. Mennucci, H. P. Hratchian, J. V. Ortiz, A. F. Izmaylov, J. L. Sonnenberg, D. Williams-Young, F. Ding, F. Lipparini, F. Egidi, J. Goings, B. Peng, A. Petrone, T. Henderson, D. Ranasinghe, V. G. Zakrzewski, J. Gao, N. Rega, G. Zheng, W. Liang, M. Hada, M. Ehara, K. Toyota, R. Fukuda, J. Hasegawa, M. Ishida, T. Nakajima, Y. Honda, O. Kitao, H. Nakai, T. Vreven, K. Throssell, J. A. Montgomery, Jr., J. E. Peralta, F. Ogliaro, M. J. Bearpark, J. J. Heyd, E. N. Brothers, K. N. Kudin, V. N. Staroverov, T. A. Keith, R. Kobayashi, J. Normand, K. Raghavachari, A. P. Rendell, J. C. Burant, S. S. Iyengar, J. Tomasi, M. Cossi, J. M. Millam, M. Klene, C. Adamo, R. Cammi, J. W. Ochterski, R. L. Martin, K. Morokuma, O. Farkas, J. B. Foresman, D. J. Fox, Gaussian 16, Revision C.01; Gaussian, Inc., Wallingford CT, 2019.
- S9. C. E. Colwell, T. W. Price, T. Stauch, R. Jasti, *Chem. Sci.*, 2020, **11**, 3923–3930.
- S10. Visual Molecular Dynamics. <https://www.ks.uiuc.edu/Research/vmd/>. (accessed August 26, 2024)
- S11. A. D. Becke, *Phys. Rev. A*, 1988, **38**, 3098–3100.
- S12. A. D. Becke, *J. Phys. Chem.*, 1993, **98**, 5648–5652.
- S13. C. Lee, W. Yang, R. G. Parr, *Phys. Rev. B*, 1988, **37**, 785–789.
- S14. S. Grimme, J. Antony, S. Ehrlich, H. A. Krieg, *J. Chem. Phys.*, 2010, **132**, 154104.
- S15. P. v. R. Schleyer, C. Maerker, A. Dransfeld, H. Jiao, N. J. R. v. E. Hommes, *J. Am. Chem. Soc.*, 1996, **118**, 6317–6318.
- S16. Z. Chen, C. S. Wannere, C. Corminboeuf, R. Puchta, P. v. R. Schleyer, *Chem. Rev.*, 2005, **105**, 3842–3888.
- S17. R. Herges, D. Geuenich, *J. Phys. Chem. A*, 2001, **105**, 3214–3220.
- S18. D. Geuenich, K. Hess, F. Köhler, R. Herges, *Chem. Rev.*, 2005, **105**, 3758–3772.
